# Supplementary material for: Divergent construction of 3-(indol-2-yl)succinimide/maleimide and fused benzodiazepine skeletons from 2-(1H-indol-1-yl)anilines and maleimides
Source: Royal Society of Chemistry journal article supplement (doi:10.1039/d2qo00779g), 2022-01-01
Supplement: d2qo00779g1.pdf [file d2qo00779g1.pdf]

## Supporting Information

### **Divergent Construction of 3-(Indol-2-yl)succinimide/maleimide and Fused Benzodiazepine Skeletons from 2-(1*H*-Indol-1-yl)anilines and Maleimides**

Chunhua Ma, Yue Wang, Guang Chen, Jingyi Li, Yuqin Jiang, Xinying Zhang\* and Xuesen Fan\*

*NMPA Key Laboratory for Research and Evaluation of Innovative Drug, Collaborative Innovation Center of Henan Province for Green Manufacturing of Fine Chemicals, Key Laboratory of Green Chemical Media and Reactions, Ministry of Education, School of Chemistry and Chemical Engineering, Henan Normal University,*

*Xinxiang, Henan 453007, China*

*E-mail: xinyingzhang@htu.cn; xuesen.fan@htu.cn*

## Table of Contents

|             |                                                |         |
|-------------|------------------------------------------------|---------|
| <b>I</b>    | General experimental information               | S3      |
| <b>II</b>   | Experimental procedures and spectroscopic data | S4-S25  |
| <b>III</b>  | Mechanism studies                              | S26-S28 |
| <b>IV</b>   | Cell antiproliferative activity assay          | S29     |
| <b>V</b>    | NMR spectra of <b>3a-3v</b>                    | S30-S56 |
| <b>VI</b>   | NMR spectra of <b>4a-4y</b>                    | S57-S87 |
| <b>VII</b>  | NMR spectra of <b>5a-5f</b>                    | S88-S94 |
| <b>VIII</b> | X-ray crystal structure and data of <b>3a</b>  | S95-S96 |
| <b>IX</b>   | X-ray crystal structure and data of <b>4a</b>  | S97-S98 |
| <b>X</b>    | References                                     | S99     |

## I. General experimental information

Unless otherwise noted, all reagents including catalyst  $[\text{Ru}(p\text{-cymene})\text{Cl}_2]_2$  were purchased from commercial sources and used without further purification. 2-(1*H*-Indol-1-yl)anilines (**1**) were prepared based on literature procedures.<sup>1</sup> Melting points were recorded with a micro melting point apparatus and uncorrected. The  $^1\text{H}$  NMR spectra were recorded at 400 MHz or 600 MHz. The  $^{13}\text{C}$  NMR spectra were recorded at 100 MHz or 150 MHz. The  $^{19}\text{F}$  NMR spectra were recorded at 376 MHz or 565 MHz. Chemical shifts were expressed in parts per million ( $\delta$ ), and were reported as s (singlet), d (doublet), t (triplet), dd (doublet of doublets), m (multiplet), br s (broad singlet), etc. The coupling constants  $J$  were given in Hz. High resolution mass spectra (HRMS) were obtained *via* ESI mode by using a MicroTOF mass spectrometer. All reactions were monitored by thin layer chromatography (TLC) using silica gel plates (silica gel 60 F254 0.25 mm), and components were visualized by observation under UV light (254 and 365 nm).

## II. Experimental procedures and spectroscopic data

### 1. Typical procedure for the synthesis of **3a** and spectroscopic data of **3a-3v**

To a reaction tube equipped with a stir bar were added 2-(1*H*-indol-1-yl)aniline (**1a**, 41.6 mg, 0.2 mmol), EA (2 mL), *N*-methylmaleimide (**2a**, 33.3 mg, 0.3 mmol), [Ru(*p*-cymene)Cl<sub>2</sub>]<sub>2</sub> (6.12 mg, 0.01 mmol), AgSbF<sub>6</sub> (13.7 mg, 0.04 mmol) and AcOH (57 μL, 1.0 mmol) with stirring. The mixture was stirred at 80 °C under air for 12 h. Upon completion, it was cooled to room temperature, quenched with saturated aqueous solution of NaHCO<sub>3</sub> (1 mL), filtered through a pad of celite, and extracted with CH<sub>2</sub>Cl<sub>2</sub> (10 mL × 3). The combined organic phases were dried over anhydrous Na<sub>2</sub>SO<sub>4</sub>, and concentrated under reduced pressure. The residue was purified by silica gel chromatography using petroleum ether/ethyl acetate (4:1) as eluent to afford **3a**. **3b-3v** were obtained in a similar manner except for that the reaction for the synthesis of **3v** was carried out at 60 °C.

#### **3-(1-(2-Aminophenyl)-1*H*-indol-2-yl)-1-methylpyrrolidine-2,5-dione (3a)**

Eluent: petroleum ether/ethyl acetate (4:1). Yellow solid (43.4 mg, 68%, dr = 0.6:0.4), mp 90.2-92.1 °C. <sup>1</sup>H NMR (600 MHz, CDCl<sub>3</sub>): δ 7.62-7.60 (m, 1H), 7.30-7.27 (m, 1.4H), 7.15-7.13 (m, 2H), 7.02 (d, *J* = 7.8 Hz, 0.6H), 6.96-6.94 (m, 1H), 6.88-6.80 (m, 2H), 6.57 (s, 0.6H), 6.56 (s, 0.4H), 4.13-4.08 (m, 1H), 3.54 (br s, 2H), 2.96-2.83 (m, 5H). <sup>13</sup>C{<sup>1</sup>H} NMR (150 MHz, CDCl<sub>3</sub>): δ 176.8, 176.0, 175.7, 175.6, 144.8, 144.5, 138.0, 137.6, 136.0, 135.9, 130.6, 130.5, 130.4, 130.3, 127.7, 127.6, 122.7, 121.8, 121.7, 120.9, 120.8, 120.7, 120.6, 119.0, 118.7, 116.7, 116.3, 110.5, 110.4, 102.4, 101.7, 39.2, 39.0, 36.4, 35.9, 25.1. HRMS (ESI) *m/z*: [M+Na]<sup>+</sup> Calcd for C<sub>19</sub>H<sub>17</sub>N<sub>3</sub>O<sub>2</sub>Na 342.1213; Found 342.1207.

#### **3-(1-(2-Aminophenyl)-6-methyl-1*H*-indol-2-yl)-1-methylpyrrolidine-2,5-dione (3b)**

Eluent: petroleum ether/ethyl acetate (4:1). White solid (40.0 mg, 60%, dr = 0.55:0.45), mp 180.8-181.9 °C. <sup>1</sup>H NMR (600 MHz, CDCl<sub>3</sub>): δ 7.48 (d, *J* = 7.8 Hz, 1H), 7.30-7.26 (m, 1.55H), 7.02 (dd, *J*<sub>1</sub> = 7.8 Hz, *J*<sub>2</sub> = 1.2 Hz, 0.45H), 6.98 (d, *J* = 7.8 Hz, 1H), 6.89-6.81 (m, 2H), 6.74 (s, 0.55H), 6.73 (s, 0.45H), 6.52 (s, 0.45H), 6.51 (s, 0.55H), 4.11-4.06 (m, 1H), 3.70 (s, 0.9H), 3.41 (s, 1.1H), 2.95-2.83 (m, 5H), 2.38 (s, 3H). <sup>13</sup>C{<sup>1</sup>H} NMR (150

MHz, CDCl<sub>3</sub>):  $\delta$  176.9, 176.0, 175.8, 175.7, 144.9, 144.6, 138.4, 138.0, 135.2, 135.1, 132.7, 130.6, 130.5, 130.4, 130.3, 125.5, 125.4, 122.6, 122.5, 122.0, 121.9, 120.4, 120.3, 118.9, 118.6, 116.6, 116.2, 110.3, 110.2, 102.2, 101.6, 39.2, 39.0, 36.4, 35.9, 25.1, 21.8. HRMS (ESI) m/z: [M+H]<sup>+</sup> Calcd for C<sub>20</sub>H<sub>20</sub>N<sub>3</sub>O<sub>2</sub> 334.1550; Found 334.1543.

### **3-(1-(2-Aminophenyl)-6-methoxy-1H-indol-2-yl)-1-methylpyrrolidine-2,5-dione (3c)**

Eluent: petroleum ether/ethyl acetate (4:1). White solid (39.8 mg, 57%, dr = 0.6:0.4), mp 200.1-202.0 °C. <sup>1</sup>H NMR (600 MHz, CDCl<sub>3</sub>):  $\delta$  7.47 (d, *J* = 9.0 Hz, 1H), 7.31-7.27 (m, 1.6H), 7.03 (dd, *J*<sub>1</sub> = 7.8 Hz, *J*<sub>2</sub> = 1.2 Hz, 0.4H), 6.89-6.80 (m, 3H), 6.50 (s, 0.4H), 6.49 (s, 0.6H), 6.40 (d, *J* = 1.8 Hz, 0.6H), 6.39 (d, *J* = 1.8 Hz, 0.4H), 4.10-4.05 (m, 1H), 3.733 (s, 1.8H), 3.729 (s, 1.2H), 3.71 (s, 0.8H), 3.43 (s, 1.2H), 2.95-2.82 (m, 5H). <sup>13</sup>C{<sup>1</sup>H} NMR (150 MHz, CDCl<sub>3</sub>):  $\delta$  176.9, 176.1, 175.8, 175.7, 157.1, 144.8, 144.5, 138.8, 138.4, 134.6, 134.5, 130.6, 130.5, 130.4, 130.3, 121.8, 121.7, 121.4, 121.3, 119.0, 118.7, 116.7, 116.3, 110.8, 110.7, 102.3, 101.7, 93.8, 93.7, 55.7, 39.3, 39.0, 36.4, 35.9, 25.1. HRMS (ESI) m/z: [M+Na]<sup>+</sup> Calcd for C<sub>20</sub>H<sub>19</sub>N<sub>3</sub>O<sub>3</sub>Na 372.1319; Found 372.1309.

### **3-(1-(2-Aminophenyl)-6-fluoro-1H-indol-2-yl)-1-methylpyrrolidine-2,5-dione (3d)**

Eluent: petroleum ether/ethyl acetate (4:1). White solid (43.8 mg, 65%, dr = 0.5:0.5), mp 215.0-216.2 °C. <sup>1</sup>H NMR (600 MHz, CDCl<sub>3</sub>):  $\delta$  7.52-7.50 (m, 1H), 7.30-7.27 (m, 1.5H), 7.02-7.01 (m, 0.5H), 6.92-6.81 (m, 3H), 6.65-6.62 (m, 1H), 6.55 (s, 0.5H), 6.54 (s, 0.5H), 4.12-4.07 (m, 1H), 3.71 (s, 1H), 3.41 (s, 1H), 2.97-2.83 (m, 5H). <sup>13</sup>C{<sup>1</sup>H} NMR (150 MHz, CDCl<sub>3</sub>):  $\delta$  176.7, 175.9, 175.6, 175.5, 160.3 (d, <sup>1</sup>*J*<sub>C-F</sub> = 237.0 Hz), 144.7, 144.4, 138.1 (d, <sup>3</sup>*J*<sub>C-F</sub> = 11.9 Hz), 137.7 (d, <sup>3</sup>*J*<sub>C-F</sub> = 12.0 Hz), 136.4 (d, <sup>4</sup>*J*<sub>C-F</sub> = 2.3 Hz), 136.3 (d, <sup>4</sup>*J*<sub>C-F</sub> = 2.7 Hz), 130.8, 130.7, 130.4, 130.1, 124.1, 124.0, 121.6 (d, <sup>3</sup>*J*<sub>C-F</sub> = 9.9 Hz), 121.5, 121.48 (d, <sup>3</sup>*J*<sub>C-F</sub> = 9.9 Hz), 121.4, 119.1, 118.8, 116.8, 116.4, 109.6 (d, <sup>2</sup>*J*<sub>C-F</sub> = 25.8 Hz), 109.5 (d, <sup>2</sup>*J*<sub>C-F</sub> = 23.4 Hz), 102.4, 101.8, 97.0 (d, <sup>2</sup>*J*<sub>C-F</sub> = 27.2 Hz), 96.9 (d, <sup>2</sup>*J*<sub>C-F</sub> = 26.1 Hz), 39.2, 39.0, 36.3, 35.8, 25.1. <sup>19</sup>F NMR (565 MHz, CDCl<sub>3</sub>):  $\delta$  -119.39 – -119.43 (m). HRMS (ESI) m/z: [M+Na]<sup>+</sup> Calcd for C<sub>19</sub>H<sub>16</sub>FN<sub>3</sub>O<sub>2</sub>Na 360.1119; Found 360.1119.

### 3-(1-(2-Aminophenyl)-6-chloro-1*H*-indol-2-yl)-1-methylpyrrolidine-2,5-dione (3e)

Eluent: petroleum ether/ethyl acetate (4:1). White solid (45.2 mg, 64%, dr = 0.55:0.45), mp 220.0-221.7 °C. <sup>1</sup>H NMR (600 MHz, CDCl<sub>3</sub>): δ 7.50 (d, *J* = 8.4 Hz, 1H), 7.31-7.27 (m, 1.55H), 7.11-7.10 (m, 1H), 7.00 (d, *J* = 6.6 Hz, 0.45H), 6.94 (s, 0.55H), 6.93 (s, 0.45H), 6.88-6.81 (m, 2H), 6.55 (s, 0.45H), 6.54 (s, 0.55H), 4.11-4.06 (m, 1H), 3.70 (s, 0.9H), 3.41 (s, 1.1H), 2.96-2.82 (m, 5H). <sup>13</sup>C{<sup>1</sup>H} NMR (150 MHz, CDCl<sub>3</sub>): δ 176.6, 175.7, 175.5, 175.4, 144.7, 144.4, 138.4, 138.0, 136.8, 136.7, 130.9, 130.8, 130.4, 130.2, 128.7, 126.2, 126.1, 121.6, 121.59, 121.56, 121.1, 119.1, 118.8, 116.9, 116.4, 110.45, 110.41, 102.4, 101.7, 39.2, 38.9, 36.2, 35.7, 25.2. HRMS (ESI) m/z: [M+Na]<sup>+</sup> Calcd for C<sub>19</sub>H<sub>16</sub>ClN<sub>3</sub>O<sub>2</sub>Na 376.0823; Found 376.0814.

### 3-(1-(2-Aminophenyl)-6-bromo-1*H*-indol-2-yl)-1-methylpyrrolidine-2,5-dione (3f)

Eluent: petroleum ether/ethyl acetate (4:1). White solid (48.4 mg, 61%, dr = 0.6:0.4), mp 236.1-236.7 °C. <sup>1</sup>H NMR (600 MHz, CDCl<sub>3</sub>): δ 7.56-7.53 (m, 1H), 7.27-7.16 (m, 2.6H), 6.93-6.89 (m, 1.4H), 6.83-6.81 (m, 1H), 6.72-6.63 (m, 2H), 4.93 (s, 1.2H), 4.77 (s, 0.8H), 4.28 (dd, *J*<sub>1</sub> = 9.6 Hz, *J*<sub>2</sub> = 5.2 Hz, 0.6H), 4.08-4.04 (m, 0.4H), 2.95-2.84 (m, 2H), 2.81 (s, 1.2H), 2.70 (s, 1.8H). <sup>13</sup>C{<sup>1</sup>H} NMR (100 MHz, DMSO): δ 177.3, 176.6, 176.4, 176.0, 146.3, 139.2, 139.0, 138.4, 138.3, 130.8, 130.6, 130.5, 130.4, 127.1, 126.9, 123.4, 122.5, 120.0, 119.9, 117.0, 116.9, 116.6, 116.4, 115.0, 114.8, 113.1, 112.9, 103.8, 101.2, 38.9, 36.5, 35.0, 25.2, 25.0. HRMS (ESI) m/z: [M+Na]<sup>+</sup> Calcd for C<sub>19</sub>H<sub>16</sub>BrN<sub>3</sub>O<sub>2</sub>Na 420.0318; Found 420.0295.

### 3-(1-(2-Aminophenyl)-6-(trifluoromethyl)-1*H*-indol-2-yl)-1-methylpyrrolidine-2,5-dione (3g)

Eluent: petroleum ether/ethyl acetate (4:1). White solid (57.3 mg, 74%, dr = 0.7:0.3), mp 82.7-84.6 °C. <sup>1</sup>H NMR (600 MHz, CDCl<sub>3</sub>): δ 7.68 (d, *J* = 8.4 Hz, 1H), 7.38 (d, *J* = 8.4 Hz, 1H), 7.32-7.28 (m, 1.7H), 7.22 (s, 0.7H), 7.21 (s, 0.3H), 7.02-7.01 (m, 0.3H), 6.90-6.82 (m, 2H), 6.63 (s, 0.3H), 6.62 (s, 0.7H), 4.14 (dd, *J*<sub>1</sub> = 9.6 Hz, *J*<sub>2</sub> = 5.4 Hz, 0.3H), 4.10 (dd, *J*<sub>1</sub> = 9.6 Hz, *J*<sub>2</sub> = 5.4 Hz, 0.7H), 3.72 (br s, 0.6H), 3.42 (br s, 1.4H), 2.97-2.83 (m, 5H). <sup>13</sup>C{<sup>1</sup>H} NMR (150 MHz, CDCl<sub>3</sub>): δ 176.4, 175.6, 175.4, 175.3, 144.7, 144.4, 139.0, 138.9, 136.9, 136.5, 131.1, 131.0, 130.4, 130.2, 130.1, 130.0, 125.0 (q, <sup>1</sup>*J*<sub>C-F</sub> = 270.3 Hz), 124.8 (q, <sup>2</sup>*J*<sub>C-F</sub> = 31.8 Hz), 121.2, 121.1, 120.8,

120.7, 119.2, 118.9, 117.5 (q,  $^3J_{C-F} = 3.6$  Hz), 117.0, 116.5, 108.0 (q,  $^3J_{C-F} = 4.4$  Hz), 102.5, 101.8, 39.2, 38.9, 36.2, 35.7, 25.18, 25.16.  $^{19}\text{F}$  NMR (565 MHz,  $\text{CDCl}_3$ ):  $\delta$  -60.51 (s), -60.52 (s). HRMS (ESI)  $m/z$ :  $[\text{M}+\text{Na}]^+$  Calcd for  $\text{C}_{20}\text{H}_{16}\text{F}_3\text{N}_3\text{O}_2\text{Na}$  410.1087; Found 410.1074.

### **3-(1-(2-Aminophenyl)-5-methyl-1*H*-indol-2-yl)-1-methylpyrrolidine-2,5-dione (3h)**

Eluent: petroleum ether/ethyl acetate (4:1). White solid (44.0 mg, 66%, dr = 0.5:0.5), mp 91.2-93.0 °C.  $^1\text{H}$  NMR (600 MHz,  $\text{CDCl}_3$ ):  $\delta$  7.38 (s, 1H), 7.28-7.23 (m, 1.5H), 7.00 (dd,  $J_1 = 7.2$  Hz,  $J_2 = 1.2$  Hz, 0.5H), 6.96 (d,  $J = 8.4$  Hz, 1H), 6.85-6.78 (m, 3H), 6.47 (s, 0.5H), 6.46 (s, 0.5H), 4.08-4.04 (m, 1H), 3.69 (br s, 1H), 3.41 (br s, 1H), 2.93-2.81 (m, 5H), 2.42 (s, 3H).  $^{13}\text{C}\{^1\text{H}\}$  NMR (150 MHz,  $\text{CDCl}_3$ ):  $\delta$  176.8, 176.0, 175.8, 175.7, 144.9, 144.6, 136.4, 136.0, 135.9, 130.5, 130.4, 130.3, 130.2, 130.14, 130.11, 128.0, 127.9, 124.3, 122.0, 121.9, 120.4, 120.3, 118.9, 118.6, 116.6, 116.2, 110.14, 110.12, 101.9, 101.2, 39.2, 39.0, 36.4, 35.9, 25.1, 21.4. HRMS (ESI)  $m/z$ :  $[\text{M}+\text{Na}]^+$  Calcd for  $\text{C}_{20}\text{H}_{19}\text{N}_3\text{O}_2\text{Na}$  356.1369; Found 356.1363.

### **3-(1-(2-Aminophenyl)-5-methoxy-1*H*-indol-2-yl)-1-methylpyrrolidine-2,5-dione (3i)**

Eluent: petroleum ether/ethyl acetate (4:1). White solid (38.4 mg, 55%, dr = 0.5:0.5), mp 90.3-92.0 °C.  $^1\text{H}$  NMR (600 MHz,  $\text{CDCl}_3$ ):  $\delta$  7.30-7.25 (m, 1.5H), 7.06 (d,  $J = 1.8$  Hz, 1H), 7.01 (dd,  $J_1 = 7.8$  Hz,  $J_2 = 1.2$  Hz, 0.5H), 6.87-6.79 (m, 4H), 6.49 (s, 0.5H), 6.48 (s, 0.5H), 4.10-4.05 (m, 1H), 3.84 (s, 3H), 3.70 (s, 1H), 3.40 (s, 1H), 2.96-2.83 (m, 5H).  $^{13}\text{C}\{^1\text{H}\}$  NMR (150 MHz,  $\text{CDCl}_3$ ):  $\delta$  176.8, 176.0, 175.8, 175.6, 155.0, 154.9, 144.9, 144.6, 136.4, 136.3, 133.2, 132.8, 130.5, 130.4, 130.4, 130.3, 128.1, 128.0, 122.0, 121.9, 118.9, 118.6, 116.7, 116.2, 112.8, 111.24, 111.21, 102.5, 102.4, 101.9, 101.4, 55.94, 55.93, 39.3, 39.0, 36.4, 35.9, 25.1. HRMS (ESI)  $m/z$ :  $[\text{M}+\text{Na}]^+$  Calcd for  $\text{C}_{20}\text{H}_{19}\text{N}_3\text{O}_3\text{Na}$  372.1319; Found 372.1306.

### **3-(1-(2-Aminophenyl)-5-fluoro-1*H*-indol-2-yl)-1-methylpyrrolidine-2,5-dione (3j)**

Eluent: petroleum ether/ethyl acetate (4:1). White solid (48.5 mg, 72%, dr = 0.5:0.5), mp 73.2-74.0 °C.  $^1\text{H}$  NMR (600 MHz,  $\text{CDCl}_3$ ):  $\delta$  7.30-7.24 (m, 2.5H), 7.01 (dd,  $J_1 = 7.2$  Hz,  $J_2 = 1.2$  Hz, 0.5H), 6.91-6.81 (m, 4H), 6.531 (s, 0.5H), 6.526 (s, 0.5H), 4.11-4.07 (m, 1H), 3.70 (s, 1H), 3.39 (s, 1H), 2.98-2.83 (m, 5H).  $^{13}\text{C}\{^1\text{H}\}$

NMR (150 MHz, CDCl<sub>3</sub>):  $\delta$  176.6, 175.8, 175.6, 175.5, 158.6 (d,  $^1J_{C-F}$  = 234.3 Hz), 158.5 (d,  $^1J_{C-F}$  = 234.3 Hz), 144.8, 144.5, 137.6, 137.5, 134.5, 134.1, 130.7, 130.6, 130.5, 130.2, 128.0 (d,  $^3J_{C-F}$  = 7.2 Hz), 127.9 (d,  $^3J_{C-F}$  = 7.5 Hz), 121.5, 119.1, 118.7, 116.8, 116.4, 111.2 (d,  $^3J_{C-F}$  = 6.3 Hz), 111.18 (d,  $^3J_{C-F}$  = 6.5 Hz), 111.16, 111.0, 105.6 (d,  $^2J_{C-F}$  = 23.0 Hz), 105.5 (d,  $^2J_{C-F}$  = 22.8 Hz), 102.2 (d,  $^4J_{C-F}$  = 4.4 Hz), 101.7 (d,  $^4J_{C-F}$  = 4.2 Hz), 39.2, 39.0, 36.3, 35.8, 25.2. <sup>19</sup>F NMR (565 MHz, CDCl<sub>3</sub>):  $\delta$  -123.45 – -123.49 (m), -123.51 – -123.55 (m). HRMS (ESI) m/z: [M+Na]<sup>+</sup> Calcd for C<sub>19</sub>H<sub>16</sub>FN<sub>3</sub>O<sub>2</sub>Na 360.1119; Found 360.1106.

### **3-(1-(2-Aminophenyl)-5-chloro-1H-indol-2-yl)-1-methylpyrrolidine-2,5-dione (3k)**

Eluent: petroleum ether/ethyl acetate (4:1). White solid (47.3 mg, 67%, dr = 0.6:0.4), mp 83.9-85.6 °C. <sup>1</sup>H NMR (600 MHz, CDCl<sub>3</sub>):  $\delta$  7.57 (d,  $J$  = 1.8 Hz, 1H), 7.30-7.27 (m, 1.6H), 7.11-7.09 (m, 1H), 7.00 (dd,  $J_1$  = 7.8 Hz,  $J_2$  = 1.2 Hz, 0.4H), 6.88-6.81 (m, 3H), 6.52 (s, 0.4H), 6.51 (s, 0.6H), 4.11-4.07 (m, 1H), 3.69 (s, 0.8H), 3.39 (s, 1.2H), 2.98-2.82 (m, 5H). <sup>13</sup>C{<sup>1</sup>H} NMR (150 MHz, CDCl<sub>3</sub>):  $\delta$  176.5, 175.7, 175.5, 175.4, 144.7, 144.4, 137.4, 137.3, 136.3, 135.9, 130.8, 130.7, 130.4, 130.1, 128.7, 128.6, 126.53, 126.50, 123.0, 121.3, 120.1, 120.0, 119.1, 118.8, 116.8, 116.4, 111.6, 111.5, 101.9, 101.3, 39.2, 38.9, 36.2, 35.7, 25.2. HRMS (ESI) m/z: [M+Na]<sup>+</sup> Calcd for C<sub>19</sub>H<sub>16</sub>ClN<sub>3</sub>O<sub>2</sub>Na 376.0823; Found 376.0820.

### **3-(1-(2-Aminophenyl)-5-bromo-1H-indol-2-yl)-1-methylpyrrolidine-2,5-dione (3l)**

Eluent: petroleum ether/ethyl acetate (4:1). White solid (51.6 mg, 65%, dr = 0.6:0.4), mp 80.0-81.5 °C. <sup>1</sup>H NMR (600 MHz, CDCl<sub>3</sub>):  $\delta$  7.73 (d,  $J$  = 0.6 Hz, 1H), 7.30-7.28 (m, 1.6H), 7.23 (d,  $J$  = 9.0 Hz, 1H), 7.00 (d,  $J$  = 7.2 Hz, 0.4H), 6.88-6.81 (m, 3H), 6.514 (s, 0.4H), 6.510 (s, 0.6H), 4.12-4.07 (m, 1H), 3.68 (s, 0.8H), 3.38 (s, 1.2H), 2.97-2.82 (m, 5H). <sup>13</sup>C{<sup>1</sup>H} NMR (150 MHz, CDCl<sub>3</sub>):  $\delta$  176.5, 175.7, 175.5, 175.4, 144.7, 144.4, 137.2, 137.1, 136.6, 136.2, 130.8, 130.7, 130.4, 130.1, 129.3, 129.2, 125.6, 123.2, 123.1, 121.3, 119.1, 118.8, 116.8, 116.4, 114.1, 114.0, 112.0, 111.9, 101.8, 101.2, 39.1, 38.9, 36.2, 35.7, 25.2. HRMS (ESI) m/z: [M+Na]<sup>+</sup> Calcd for C<sub>19</sub>H<sub>16</sub>BrN<sub>3</sub>O<sub>2</sub>Na 420.0318; Found 420.0303.

### **3-(1-(2-Aminophenyl)-4-methyl-1H-indol-2-yl)-1-methylpyrrolidine-2,5-dione (3m)**



Eluent: petroleum ether/ethyl acetate (4:1). White solid (37.3 mg, 56%, dr = 0.6:0.4), mp 209.0-209.5 °C. <sup>1</sup>H NMR (600 MHz, CDCl<sub>3</sub>): δ 7.30-7.26 (m, 1.4H), 7.07-7.01 (m, 1.6H), 6.94 (d, *J* = 7.2 Hz, 1H), 6.87-6.77 (m, 3H), 6.59 (s, 0.6H), 6.58 (s, 0.4H), 4.14-4.10 (m, 1H), 3.68 (s, 1.2H), 3.40 (s, 0.8H), 2.93-2.87 (m, 5H), 2.55 (s, 3H). <sup>13</sup>C{<sup>1</sup>H} NMR (150 MHz, CDCl<sub>3</sub>): δ 176.9, 176.1, 175.8, 175.7, 144.8, 144.5, 137.7, 137.3, 135.4, 135.3, 130.6, 130.5, 130.4, 130.3, 130.2, 127.6, 127.5, 122.9, 122.1, 122.0, 121.0, 120.9, 118.9, 118.6, 116.7, 116.3, 108.04, 108.01, 100.9, 100.2, 39.3, 39.0, 36.5, 36.0, 25.1, 18.7. HRMS (ESI) *m/z*: [M+Na]<sup>+</sup> Calcd for C<sub>20</sub>H<sub>19</sub>N<sub>3</sub>O<sub>2</sub>Na 356.1369; Found 356.1354.

### **3-(1-(2-Aminophenyl)-4-fluoro-1*H*-indol-2-yl)-1-methylpyrrolidine-2,5-dione (3n)**

Eluent: petroleum ether/ethyl acetate (4:1). White solid (41.8 mg, 62%, dr = 0.6:0.4), mp 155.0-156.2 °C. <sup>1</sup>H NMR (600 MHz, CDCl<sub>3</sub>): δ 7.30-7.26 (m, 1.6H), 7.07-7.03 (m, 1H), 7.01 (dd, *J*<sub>1</sub> = 7.8 Hz, *J*<sub>2</sub> = 1.2 Hz, 0.4H), 6.88-6.79 (m, 3H), 6.74-6.71 (m, 1H), 6.66 (s, 0.4H), 6.65 (s, 0.6H), 4.12-4.06 (m, 1H), 3.71(br s, 0.8H), 3.42 (br s, 1.2H), 2.97-2.84 (m, 5H). <sup>13</sup>C{<sup>1</sup>H} NMR (150 MHz, CDCl<sub>3</sub>): δ 176.5, 175.7, 175.5, 175.4, 156.2 (d, <sup>1</sup>*J*<sub>C-F</sub> = 247.7 Hz), 156.1 (d, <sup>1</sup>*J*<sub>C-F</sub> = 248.1 Hz), 144.7, 144.4, 140.4 (d, <sup>3</sup>*J*<sub>C-F</sub> = 11.7 Hz), 140.0 (d, <sup>3</sup>*J*<sub>C-F</sub> = 10.4 Hz), 136.1, 136.0, 130.8, 130.7, 130.4, 130.1, 123.3, 123.2, 121.5, 121.4, 119.0, 118.7, 116.84 (d, <sup>2</sup>*J*<sub>C-F</sub> = 21.3 Hz), 116.83, 116.8 (d, <sup>2</sup>*J*<sub>C-F</sub> = 22.2 Hz), 116.4, 106.6 (d, <sup>4</sup>*J*<sub>C-F</sub> = 3.0 Hz), 106.5 (d, <sup>4</sup>*J*<sub>C-F</sub> = 3.3 Hz), 105.7 (d, <sup>2</sup>*J*<sub>C-F</sub> = 18.6 Hz), 105.6 (d, <sup>2</sup>*J*<sub>C-F</sub> = 18.9 Hz), 98.4, 97.7, 39.2, 38.9, 36.3, 35.7, 25.2. <sup>19</sup>F NMR (565 MHz, CDCl<sub>3</sub>): δ -122.12 (dd, *J*<sub>1</sub> = 10.2 Hz, *J*<sub>2</sub> = 5.7 Hz), -122.16 ((dd, *J*<sub>1</sub> = 9.6 Hz, *J*<sub>2</sub> = 5.1 Hz)). HRMS (ESI) *m/z*: [M+Na]<sup>+</sup> Calcd for C<sub>19</sub>H<sub>16</sub>FN<sub>3</sub>O<sub>2</sub>Na 360.1119; Found 360.1100.

### **3-(1-(2-Aminophenyl)-7-fluoro-1*H*-indol-2-yl)-1-methylpyrrolidine-2,5-dione (3o)**

Eluent: petroleum ether/ethyl acetate (4:1). Yellow solid (39.8 mg, 59%, dr = 0.55:0.45), mp 137.8-138.7 °C. <sup>1</sup>H NMR (400 MHz, CDCl<sub>3</sub>): δ 7.35-7.30 (m, 1.45H), 7.24-7.21 (m, 1H), 7.06-6.99 (m, 1.55H), 6.83-6.75 (m, 3H), 6.57 (s, 1H), 4.07-4.01 (m, 1H), 3.57 (br s, 2H), 2.90-2.81 (m, 5H). <sup>13</sup>C{<sup>1</sup>H} NMR (100 MHz, CDCl<sub>3</sub>): δ 176.6, 175.8, 175.6, 175.4, 149.7 (d, <sup>1</sup>*J*<sub>C-F</sub> = 246.2 Hz), 149.6 (d, <sup>1</sup>*J*<sub>C-F</sub> = 246.3 Hz), 144.7, 144.6, 137.5, 137.4,

131.6 (d,  $^3J_{\text{C-F}} = 8.7$  Hz), 131.5 (d,  $^3J_{\text{C-F}} = 8.6$  Hz), 130.6, 130.5, 130.0, 129.9, 125.6 (d,  $^2J_{\text{C-F}} = 35.7$  Hz), 125.5 (d,  $^2J_{\text{C-F}} = 35.4$  Hz), 123.4, 123.3, 121.0 (d,  $^4J_{\text{C-F}} = 2.4$  Hz), 120.9 (d,  $^4J_{\text{C-F}} = 3.9$  Hz), 118.6, 118.3, 116.6 (d,  $^3J_{\text{C-F}} = 6.4$  Hz), 116.5 (d,  $^3J_{\text{C-F}} = 7.3$  Hz), 116.4, 116.0, 108.5 (d,  $^2J_{\text{C-F}} = 16.9$  Hz), 108.4 (d,  $^2J_{\text{C-F}} = 17.0$  Hz), 103.2, 102.5, 39.0, 38.7, 36.3, 35.9, 25.2, 25.1.  $^{19}\text{F}$  NMR (376 MHz,  $\text{CDCl}_3$ ):  $\delta$  -135.64 (d,  $J = 10.5$  Hz), -135.83 (d,  $J = 11.3$  Hz). HRMS (ESI)  $m/z$ :  $[\text{M}+\text{Na}]^+$  Calcd for  $\text{C}_{19}\text{H}_{16}\text{FN}_3\text{O}_2\text{Na}$  360.1119; Found 360.1108.

### **3-(1-(2-Aminophenyl)-7-chloro-1H-indol-2-yl)-1-methylpyrrolidine-2,5-dione (3p)**

Eluent: petroleum ether/ethyl acetate (4:1). White solid (46.6 mg, 66%, dr = 0.5:0.5), mp 134.6-136.0 °C.  $^1\text{H}$  NMR (600 MHz,  $\text{CDCl}_3$ ):  $\delta$  7.51-7.50 (m, 1H), 7.30 (td,  $J_1 = 7.8$  Hz,  $J_2 = 1.2$  Hz, 0.5H), 7.27-7.25 (m, 1H), 7.13-7.12 (m, 1H), 7.06-7.02 (m, 1.5H), 6.85-6.76 (m, 2H), 6.59 (s, 0.5H), 6.58 (s, 0.5H), 4.05-4.01 (m, 1H), 3.47 (br s, 2H), 2.97-2.86 (m, 5H).  $^{13}\text{C}\{^1\text{H}\}$  NMR (100 MHz,  $\text{CDCl}_3$ ):  $\delta$  176.6, 175.8, 175.6, 175.5, 145.6, 145.5, 138.0, 137.9, 133.0, 132.6, 131.1, 131.0, 130.8, 130.7, 130.6, 130.4, 124.3, 124.2, 123.2, 122.9, 121.43, 121.40, 119.6, 119.5, 118.5, 118.1, 117.1, 117.0, 116.1, 115.7, 103.3, 102.5, 39.2, 38.9, 36.4, 35.9, 25.2, 25.1. HRMS (ESI)  $m/z$ :  $[\text{M}+\text{Na}]^+$  Calcd for  $\text{C}_{19}\text{H}_{16}\text{ClN}_3\text{O}_2\text{Na}$  376.0823; Found 376.0813.

### **3-(1-(2-Amino-5-chlorophenyl)-1H-indol-2-yl)-1-methylpyrrolidine-2,5-dione (3q)**

Eluent: petroleum ether/ethyl acetate (4:1). White solid (40.9 mg, 58%, dr = 0.6:0.4), mp 82.1-83.6 °C.  $^1\text{H}$  NMR (600 MHz,  $\text{CDCl}_3$ ):  $\delta$  7.62-7.61 (m, 1H), 7.36 (d,  $J = 1.8$  Hz, 0.6H), 7.27 (d,  $J = 2.4$  Hz, 0.6H), 7.25 (d,  $J = 1.8$  Hz, 0.4H), 7.19-7.15 (m, 2H), 7.04 (d,  $J = 2.4$  Hz, 0.4H), 6.97-6.94 (m, 1H), 6.83 (d,  $J = 8.4$  Hz, 0.4H), 6.80 (d,  $J = 9.0$  Hz, 0.6H), 6.59 (s, 0.4H), 6.57 (s, 0.6H), 4.11 (dd,  $J_1 = 9.6$  Hz,  $J_2 = 5.4$  Hz, 0.4H), 4.07 (dd,  $J_1 = 9.6$  Hz,  $J_2 = 4.8$  Hz, 0.6H), 3.76 (s, 0.8H), 3.43 (s, 1.2H), 3.05-2.83 (m, 5H).  $^{13}\text{C}\{^1\text{H}\}$  NMR (150 MHz,  $\text{CDCl}_3$ ):  $\delta$  176.6, 175.8, 175.5, 175.4, 143.7, 143.2, 137.8, 137.3, 135.9, 135.5, 130.6, 130.5, 130.4, 129.9, 127.8, 123.03, 123.01, 123.0, 122.7, 122.6, 121.14, 121.11, 120.9, 120.8, 117.6, 117.1, 110.4, 110.3, 102.9, 101.8, 39.1, 38.7, 36.3, 35.7, 25.23, 25.21. HRMS (ESI)  $m/z$ :  $[\text{M}+\text{Na}]^+$  Calcd for  $\text{C}_{19}\text{H}_{16}\text{ClN}_3\text{O}_2\text{Na}$  376.0823; Found 376.0816.

### **3-(1-(2-Amino-5-bromophenyl)-1H-indol-2-yl)-1-methylpyrrolidine-2,5-dione (3r)**

Eluent: petroleum ether/ethyl acetate (4:1). White solid (47.7 mg, 60%, dr = 0.5:0.5), mp 102.3-103.5 °C. <sup>1</sup>H NMR (400 MHz, CDCl<sub>3</sub>): δ 7.62-7.59 (m, 1H), 7.49 (d, *J* = 2.0 Hz, 0.5H), 7.40-7.36 (m, 1H), 7.19-7.14 (m, 2.5H), 6.97-6.93 (m, 1H), 6.79-6.73 (m, 1H), 6.58 (s, 0.5H), 6.56 (s, 0.5H), 4.12-4.05 (m, 1H), 3.78 (br s, 1H), 3.46 (br s, 1H), 3.09-2.80 (m, 5H). <sup>13</sup>C{<sup>1</sup>H} NMR (150 MHz, CDCl<sub>3</sub>): δ 176.6, 175.8, 175.5, 175.4, 144.2, 143.7, 137.8, 137.3, 135.9, 135.5, 133.4, 133.3, 133.2, 132.8, 127.4, 123.0, 123.0, 122.9, 121.2, 121.1, 120.9, 120.8, 118.0, 117.5, 110.4, 110.3, 109.6, 109.2, 102.9, 101.8, 39.1, 38.7, 36.3, 35.7, 25.3, 25.2. HRMS (ESI) *m/z*: [M+H]<sup>+</sup> Calcd for C<sub>19</sub>H<sub>17</sub>BrN<sub>3</sub>O<sub>2</sub> 398.0499; Found 398.0491.

### **3-(1-(2-Amino-4-methoxyphenyl)-1H-indol-2-yl)-1-methylpyrrolidine-2,5-dione (3s)**

Eluent: petroleum ether/ethyl acetate (4:1). White solid (39.1 mg, 56%, dr = 0.55:0.45), mp 82.4-84.0 °C. <sup>1</sup>H NMR (600 MHz, CDCl<sub>3</sub>): δ 7.61-7.59 (m, 1H), 7.21 (d, *J* = 8.4 Hz, 0.45H), 7.16-7.12 (m, 2H), 6.98-6.95 (m, 1H), 6.93 (d, *J* = 8.4 Hz, 0.55H), 6.55 (s, 0.55H), 6.54 (s, 0.45H), 6.42 (dd, *J*<sub>1</sub> = 8.4 Hz, *J*<sub>2</sub> = 2.4 Hz, 0.45H), 6.39-6.36 (m, 1.55H), 4.13-4.08 (m, 1H), 3.82 (s, 1.35H), 3.81 (s, 1.65H), 3.68 (s, 1.1H), 3.38 (s, 0.9H), 2.99-2.84 (m, 5H). <sup>13</sup>C{<sup>1</sup>H} NMR (150 MHz, CDCl<sub>3</sub>): δ 176.8, 176.0, 175.8, 175.6, 161.2, 145.9, 145.6, 138.3, 137.9, 136.3, 136.2, 131.4, 131.1, 127.7, 127.6, 122.6, 120.73, 120.70, 120.67, 120.6, 115.0, 114.9, 110.43, 110.40, 104.7, 104.5, 102.0, 101.4, 101.3, 101.2, 55.4, 39.2, 38.9, 36.4, 36.0, 25.1. HRMS (ESI) *m/z*: [M+Na]<sup>+</sup> Calcd for C<sub>20</sub>H<sub>19</sub>N<sub>3</sub>O<sub>3</sub>Na 372.1319; Found 372.1317.

### **3-(1-(2-Aminophenyl)-1H-indol-2-yl)-1-ethylpyrrolidine-2,5-dione (3t)**

Eluent: petroleum ether/ethyl acetate (4:1). White solid (40.0 mg, 60%, dr = 0.7:0.3), mp 201.0-202.2 °C. <sup>1</sup>H NMR (400 MHz, CDCl<sub>3</sub>): δ 7.63-7.60 (m, 1H), 7.33-7.26 (m, 1.3H), 7.17-7.13 (m, 2H), 7.04 (dd, *J*<sub>1</sub> = 7.6 Hz, *J*<sub>2</sub> = 1.2 Hz, 0.7H), 6.97-6.95 (m, 1H), 6.89-6.80 (m, 2H), 6.55 (s, 1H), 4.11-4.06 (m, 1H), 3.57-3.48 (m, 2H), 3.13 (br s, 2H), 2.98-2.81 (m, 2H), 1.17-1.12 (m, 3H). <sup>13</sup>C{<sup>1</sup>H} NMR (100 MHz, CDCl<sub>3</sub>): δ 176.5, 175.8, 175.5, 175.4, 144.9, 144.5, 137.9, 137.5, 136.3, 136.2, 130.6, 130.5, 130.4, 130.2, 127.8, 127.7, 122.7, 121.9, 120.8,

120.79, 120.7, 120.6, 119.0, 118.8, 116.7, 116.3, 110.5, 110.4, 101.8, 101.4, 39.0, 38.8, 36.4, 36.2, 34.14, 34.10, 13.00, 12.97. HRMS (ESI)  $m/z$ :  $[M+Na]^+$  Calcd for  $C_{20}H_{19}N_3O_2Na$  356.1369; Found 356.1352.

**3-(1-(2-Aminophenyl)-1*H*-indol-2-yl)-1-benzylpyrrolidine-2,5-dione (3u)**

Eluent: petroleum ether/ethyl acetate (4:1). White solid (41.1 mg, 52%, dr = 0.5:0.5), mp 94.0-95.0 °C.  $^1H$  NMR (600 MHz,  $CDCl_3$ ):  $\delta$  7.58-7.57 (m, 1H), 7.35-7.34 (m, 2H), 7.29-7.23 (m, 4.5H), 7.14-7.11 (m, 2H), 7.00 (dd,  $J_1 = 7.8$  Hz,  $J_2 = 1.2$  Hz, 0.5H), 6.95-6.93 (m, 1H), 6.86-6.83 (m, 1H), 6.79-6.73 (m, 1H), 6.47 (s, 0.5H), 6.46 (s, 0.5H), 4.62-4.56 (m, 2H), 4.06-4.03 (m, 1H), 3.67 (s, 1H), 3.36 (s, 1H), 2.92-2.79 (m, 2H).  $^{13}C\{^1H\}$  NMR (150 MHz,  $CDCl_3$ ):  $\delta$  176.3, 175.7, 175.4, 175.2, 144.9, 144.5, 137.9, 137.5, 136.3, 136.2, 135.7, 135.6, 130.6, 130.5, 130.4, 130.2, 128.9, 128.8, 128.7, 128.1, 128.0, 127.8, 127.7, 122.7, 121.8, 121.7, 120.83, 120.81, 120.8, 120.7, 119.0, 118.7, 116.7, 116.3, 110.6, 110.4, 101.8, 101.3, 42.8, 42.7, 39.0, 38.8, 36.4, 36.3. HRMS (ESI)  $m/z$ :  $[M+Na]^+$  Calcd for  $C_{25}H_{21}N_3O_2Na$  418.1526; Found 418.1503.

**3-(1-(2-Aminophenyl)-1*H*-pyrrol-2-yl)-1-methylpyrrolidine-2,5-dione (3v)**

Eluent: petroleum ether/ethyl acetate (4:1). Yellow syrup (33.9 mg, 63%, dr = 0.45:0.55).  $^1H$  NMR (600 MHz,  $CDCl_3$ ):  $\delta$  7.20 (d,  $J = 7.8$  Hz, 0.45H), 7.11 (t,  $J = 7.8$  Hz, 1H), 6.92 (d,  $J = 7.2$  Hz, 0.55H), 6.71-6.59 (m, 3H), 6.20-6.19 (m, 1H), 6.08-6.07 (m, 1H), 3.85-3.80 (m, 1H), 3.76 (br s, 1.1H), 3.44 (br s, 0.9H), 2.85-2.66 (m, 5H).  $^{13}C\{^1H\}$  NMR (150 MHz,  $CDCl_3$ ):  $\delta$  176.5, 175.6, 175.0, 174.9, 143.2, 143.0, 129.0, 128.9, 128.4, 128.1, 127.8, 127.7, 123.6, 123.5, 122.2, 121.9, 117.3, 117.0, 115.3, 114.8, 108.2, 106.8, 106.6, 37.5, 37.3, 35.5, 35.3, 24.0, 23.9. HRMS (ESI)  $m/z$ :  $[M+H]^+$  Calcd for  $C_{15}H_{16}N_3O_2$  270.1237; Found 270.1238.

## 2. Typical procedure for the synthesis of 4a and spectroscopic data of 4a-4y

To a reaction tube equipped with a stir bar were added 2-(1*H*-indol-1-yl)aniline (**1a**, 41.6 mg, 0.2 mmol), EA (2 mL), *N*-methylmaleimide (**2a**, 33.3 mg, 0.3 mmol), [Ru(*p*-cymene)Cl<sub>2</sub>]<sub>2</sub> (6.12 mg, 0.01 mmol), AgSbF<sub>6</sub> (13.7 mg, 0.04 mmol) and AcOH (57 μL, 1.0 mmol) with stirring. The mixture was stirred at 80 °C under air for 12 h. After being cooled to room temperature, it was added with BF<sub>3</sub>·Et<sub>2</sub>O (49 μL, 0.4 mmol). The resulting mixture was stirred at 100 °C under air for 10 h. Upon completion, it was cooled to ambient temperature, quenched with saturated aqueous solution of NaHCO<sub>3</sub> (1 mL), filtered through a pad of celite, and extracted with CH<sub>2</sub>Cl<sub>2</sub> (10 mL × 3). The combined organic phases were dried over anhydrous Na<sub>2</sub>SO<sub>4</sub>, and concentrated under reduced pressure. The residue was purified by silica gel chromatography using petroleum ether/ethyl acetate (6:1) as eluent to afford **4a**. **4b-4y** were obtained in a similar manner except for that the reaction for the synthesis of **4y** was carried out at 60 °C and 80 °C for the two steps, respectively.

### 11-Methyl-13,13a-dihydrobenzo[2,3]pyrrolo[2',3':5,6][1,4]diazepino[1,7-*a*]indol-12(11*H*)-one (**4a**)

Eluent: petroleum ether/ethyl acetate (6:1). White solid (33.1 mg, 55%), mp 178.1-178.9 °C. <sup>1</sup>H NMR (400 MHz, CDCl<sub>3</sub>): δ 7.77 (dd, *J*<sub>1</sub> = 8.0 Hz, *J*<sub>2</sub> = 1.2 Hz, 1H), 7.62 (d, *J* = 8.4 Hz, 2H), 7.42 (dd, *J*<sub>1</sub> = 8.0 Hz, *J*<sub>2</sub> = 1.6 Hz, 1H), 7.38-7.34 (m, 1H), 7.29-7.25 (m, 1H), 7.23-7.15 (m, 2H), 6.37 (s, 1H), 4.02-4.00 (m, 1H), 3.21-3.04 (m, 5H). <sup>13</sup>C{<sup>1</sup>H} NMR (100 MHz, CDCl<sub>3</sub>): δ 175.2, 161.6, 140.2, 139.9, 136.6, 129.9, 128.9, 127.7, 126.8, 125.0, 124.8, 122.7, 121.2, 120.9, 111.1, 98.0, 34.8, 31.9, 26.3. HRMS (ESI) *m/z*: [M+H]<sup>+</sup> Calcd for C<sub>19</sub>H<sub>16</sub>N<sub>3</sub>O 302.1288; Found 302.1278.

### 3,11-Dimethyl-13,13a-dihydrobenzo[2,3]pyrrolo[2',3':5,6][1,4]diazepino[1,7-*a*]indol-12(11*H*)-one (**4b**)

Eluent: petroleum ether/ethyl acetate (6:1). White solid (32.1 mg, 51%), mp 172.0-173.5 °C. <sup>1</sup>H NMR (600 MHz, CDCl<sub>3</sub>): δ 7.77 (d, *J* = 7.8 Hz, 1H), 7.50 (d, *J* = 7.8 Hz, 1H), 7.43-7.40 (m, 2H), 7.35 (t, *J* = 7.8 Hz, 1H), 7.28 (t, *J* = 7.8 Hz, 1H), 7.01 (d, *J* = 7.8 Hz, 1H), 6.31 (s, 1H), 3.99 (d, *J* = 8.4 Hz, 1H), 3.18-3.04 (m, 5H), 2.45 (s, 3H). <sup>13</sup>C{<sup>1</sup>H} NMR (150 MHz, CDCl<sub>3</sub>): δ 175.3, 161.7, 140.2, 139.4, 137.0, 132.6, 130.0, 127.7, 126.7,

125.1, 124.7, 122.9, 120.5, 111.0, 97.8, 34.8, 31.9, 26.3, 22.0. HRMS (ESI) m/z: [M+H]<sup>+</sup> Calcd for C<sub>20</sub>H<sub>18</sub>N<sub>3</sub>O 316.1444; Found 316.1438.

**3-Methoxy-11-methyl-13,13a-dihydrobenzo[2,3]pyrrolo[2',3':5,6][1,4]diazepino[1,7-a]indol-12(11H)-one (4c)**

Eluent: petroleum ether/ethyl acetate (6:1). White solid (28.5 mg, 43%), mp 185.4-186.6 °C. <sup>1</sup>H NMR (600 MHz, CDCl<sub>3</sub>): δ 7.76 (d, *J* = 7.8 Hz, 1H), 7.49 (d, *J* = 8.4 Hz, 1H), 7.41 (d, *J* = 7.8 Hz, 1H), 7.36 (t, *J* = 7.8 Hz, 1H), 7.27 (t, *J* = 7.8 Hz, 1H), 7.12 (s, 1H), 6.84 (dd, *J*<sub>1</sub> = 8.4 Hz, *J*<sub>2</sub> = 1.8 Hz, 1H), 6.29 (s, 1H), 3.99 (d, *J* = 8.4 Hz, 1H), 3.81 (s, 3H), 3.16-3.04 (m, 5H). <sup>13</sup>C{<sup>1</sup>H} NMR (150 MHz, CDCl<sub>3</sub>): δ 175.3, 161.9, 156.8, 140.3, 139.1, 137.4, 129.9, 127.7, 126.8, 124.8, 124.7, 123.0, 121.4, 110.8, 97.8, 95.1, 55.8, 34.7, 31.9, 26.3. HRMS (ESI) m/z: [M+H]<sup>+</sup> Calcd for C<sub>20</sub>H<sub>18</sub>N<sub>3</sub>O<sub>2</sub> 332.1394; Found 332.1382.

**3-Fluoro-11-methyl-13,13a-dihydrobenzo[2,3]pyrrolo[2',3':5,6][1,4]diazepino[1,7-a]indol-12(11H)-one (4d)**

Eluent: petroleum ether/ethyl acetate (6:1). White solid (35.1 mg, 55%), mp 188.5-189.8 °C. <sup>1</sup>H NMR (600 MHz, CDCl<sub>3</sub>): δ 7.71 (d, *J* = 7.8 Hz, 1H), 7.53 (dd, *J*<sub>1</sub> = 8.4 Hz, *J*<sub>2</sub> = 5.4 Hz, 1H), 7.42 (dd, *J*<sub>1</sub> = 7.8 Hz, *J*<sub>2</sub> = 1.2 Hz, 1H), 7.37 (t, *J* = 7.8 Hz, 1H), 7.32-7.27 (m, 2H), 6.94 (td, *J*<sub>1</sub> = 9.0 Hz, *J*<sub>2</sub> = 1.8 Hz, 1H), 6.35 (s, 1H), 4.02 (d, *J* = 8.4 Hz, 1H), 3.18-3.06 (m, 5H). <sup>13</sup>C{<sup>1</sup>H} NMR (150 MHz, CDCl<sub>3</sub>): δ 175.1, 161.7, 160.1 (d, <sup>1</sup>*J*<sub>C-F</sub> = 237.5 Hz), 140.4 (d, <sup>4</sup>*J*<sub>C-F</sub> = 4.2 Hz), 140.2, 136.6 (d, <sup>3</sup>*J*<sub>C-F</sub> = 12.0 Hz), 129.6, 127.8, 127.1, 125.3, 125.0, 124.5, 121.6 (d, <sup>3</sup>*J*<sub>C-F</sub> = 9.8 Hz), 109.8 (d, <sup>2</sup>*J*<sub>C-F</sub> = 24.9 Hz), 97.9, 97.8 (d, <sup>2</sup>*J*<sub>C-F</sub> = 27.2 Hz), 34.8, 31.8, 26.4. <sup>19</sup>F NMR (376 MHz, CDCl<sub>3</sub>): δ -119.18 (td, *J*<sub>1</sub> = 9.8 Hz, *J*<sub>2</sub> = 6.0 Hz). HRMS (ESI) m/z: [M+H]<sup>+</sup> Calcd for C<sub>19</sub>H<sub>15</sub>FN<sub>3</sub>O 320.1194; Found 320.1187.

**3-Chloro-11-methyl-13,13a-dihydrobenzo[2,3]pyrrolo[2',3':5,6][1,4]diazepino[1,7-a]indol-12(11H)-one (4e)**

Eluent: petroleum ether/ethyl acetate (6:1). White solid (37.5 mg, 56%), mp 236.1-236.6 °C. <sup>1</sup>H NMR (400 MHz, CDCl<sub>3</sub>): δ 7.70 (d, *J* = 7.6 Hz, 1H), 7.60 (s, 1H), 7.50 (d, *J* = 8.4 Hz, 1H), 7.43-7.35 (m, 2H), 7.31-7.27 (m, 1H), 7.12 (dd, *J*<sub>1</sub> = 8.4 Hz, *J*<sub>2</sub> = 1.2 Hz, 1H), 6.34 (s, 1H), 3.98 (d, *J* = 7.2 Hz, 1H), 3.17-3.03 (m, 5H). <sup>13</sup>C{<sup>1</sup>H} NMR (100 MHz, CDCl<sub>3</sub>): δ 175.0, 161.6, 140.7, 140.2, 136.9, 129.4, 128.6, 127.8, 127.4, 127.2, 125.0, 124.8, 121.8, 121.7, 111.1, 98.0, 34.8, 31.8, 26.4. HRMS (ESI) *m/z*: [M+H]<sup>+</sup> Calcd for C<sub>19</sub>H<sub>15</sub>ClN<sub>3</sub>O 336.0898; Found 336.0879.

**3-Bromo-11-methyl-13,13a-dihydrobenzo[2,3]pyrrolo[2',3':5,6][1,4]diazepino[1,7-*a*]indol-12(11*H*)-one (4f)**

Eluent: petroleum ether/ethyl acetate (6:1). White solid (37.1 mg, 49%), mp 232.8-233.0 °C. <sup>1</sup>H NMR (600 MHz, CDCl<sub>3</sub>): δ 7.76 (s, 1H), 7.72 (dd, *J*<sub>1</sub> = 7.8 Hz, *J*<sub>2</sub> = 1.2 Hz, 1H), 7.47 (d, *J* = 8.4 Hz, 1H), 7.42 (dd, *J*<sub>1</sub> = 7.8 Hz, *J*<sub>2</sub> = 1.2 Hz, 1H), 7.40-7.37 (m, 1H), 7.32-7.29 (m, 1H), 7.27 (dd, *J*<sub>1</sub> = 8.4 Hz, *J*<sub>2</sub> = 1.2 Hz, 1H), 6.35 (s, 1H), 4.00-3.98 (m, 1H), 3.16 (dd, *J*<sub>1</sub> = 18.0 Hz, *J*<sub>2</sub> = 2.4 Hz, 1H), 3.12 (s, 3H), 3.08 (dd, *J*<sub>1</sub> = 18.6 Hz, *J*<sub>2</sub> = 9.0 Hz, 1H). <sup>13</sup>C{<sup>1</sup>H} NMR (150 MHz, CDCl<sub>3</sub>): δ 175.0, 161.5, 140.5, 140.2, 137.3, 129.3, 127.8, 127.7, 127.3, 125.0, 124.8, 124.4, 122.1, 116.2, 114.0, 98.0, 34.7, 31.8, 26.4. HRMS (ESI) *m/z*: [M+H]<sup>+</sup> Calcd for C<sub>19</sub>H<sub>15</sub>BrN<sub>3</sub>O 380.0393; Found 380.0373.

**11-Methyl-3-(trifluoromethyl)-13,13a-dihydrobenzo[2,3]pyrrolo[2',3':5,6][1,4]diazepino[1,7-*a*]indol-12(11*H*)-one (4g)**

Eluent: petroleum ether/ethyl acetate (6:1). White solid (45.0 mg, 61%), mp 211.0-213.0 °C. <sup>1</sup>H NMR (600 MHz, CDCl<sub>3</sub>): δ 7.89 (s, 1H), 7.74 (d, *J* = 7.8 Hz, 1H), 7.70 (d, *J* = 7.8 Hz, 1H), 7.45-7.41 (m, 3H), 7.35-7.33 (m, 1H), 6.45 (s, 1H), 4.05 (d, *J* = 7.8 Hz, 1H), 3.22-3.10 (m, 5H). <sup>13</sup>C{<sup>1</sup>H} NMR (100 MHz, CDCl<sub>3</sub>): δ. 174.9, 161.4, 142.4, 140.3, 135.6, 131.3, 129.2, 127.9, 127.5, 125.2, 125.0 (q, <sup>1</sup>*J*<sub>C-F</sub> = 269.8 Hz), 124.79, 124.77 (q, <sup>2</sup>*J*<sub>C-F</sub> = 31.8 Hz), 121.3, 117.8 (q, <sup>3</sup>*J*<sub>C-F</sub> = 3.9 Hz), 108.6 (q, <sup>3</sup>*J*<sub>C-F</sub> = 3.9 Hz), 98.1, 34.9, 31.8, 26.4. <sup>19</sup>F NMR (565 MHz, CDCl<sub>3</sub>): δ -60.60 (s). HRMS (ESI) *m/z*: [M+H]<sup>+</sup> Calcd for C<sub>20</sub>H<sub>15</sub>F<sub>3</sub>N<sub>3</sub>O 370.1162; Found 370.1151.

**2,11-Dimethyl-13,13a-dihydrobenzo[2,3]pyrrolo[2',3':5,6][1,4]diazepino[1,7-a]indol-12(11H)-one (4h)**

Eluent: petroleum ether/ethyl acetate (6:1). White solid (33.4 mg, 53%), mp 239.4-240.5 °C. <sup>1</sup>H NMR (400 MHz, CDCl<sub>3</sub>): δ 7.74 (d, *J* = 8.0 Hz, 1H), 7.49 (d, *J* = 8.4 Hz, 1H), 7.41-7.39 (m, 2H), 7.33 (t, *J* = 7.6 Hz, 1H), 7.25 (t, *J* = 7.2 Hz, 1H), 7.02 (d, *J* = 8.4 Hz, 1H), 6.27 (s, 1H), 3.95 (d, *J* = 8.0 Hz, 1H), 3.15 (dd, *J*<sub>1</sub> = 18.4 Hz, *J*<sub>2</sub> = 2.4 Hz, 1H), 3.10 (s, 3H), 3.03 (dd, *J*<sub>1</sub> = 18.0 Hz, *J*<sub>2</sub> = 8.8 Hz, 1H), 2.43 (s, 3H). <sup>13</sup>C{<sup>1</sup>H} NMR (100 MHz, CDCl<sub>3</sub>): δ 175.3, 161.6, 140.1, 139.9, 134.9, 130.6, 130.0, 129.2, 127.7, 126.6, 124.9, 124.8, 124.2, 120.6, 110.8, 97.6, 34.8, 31.9, 26.3, 21.4. HRMS (ESI) *m/z*: [M+H]<sup>+</sup> Calcd for C<sub>20</sub>H<sub>18</sub>N<sub>3</sub>O 316.1444; Found 316.1434.

**2-Methoxy-11-methyl-13,13a-dihydrobenzo[2,3]pyrrolo[2',3':5,6][1,4]diazepino[1,7-a]indol-12(11H)-one**

**(4i)**

Eluent: petroleum ether/ethyl acetate (6:1). White solid (27.8 mg, 42%), mp 229.7-230.8 °C. <sup>1</sup>H NMR (400 MHz, CDCl<sub>3</sub>): δ 7.72 (d, *J* = 7.6 Hz, 1H), 7.50 (d, *J* = 8.8 Hz, 1H), 7.40 (dd, *J*<sub>1</sub> = 8.0 Hz, *J*<sub>2</sub> = 1.2 Hz, 1H), 7.35-7.31 (m, 1H), 7.27-7.23 (m, 1H), 7.06 (d, *J* = 2.0 Hz, 1H), 6.85 (dd, *J*<sub>1</sub> = 8.8 Hz, *J*<sub>2</sub> = 2.0 Hz, 1H), 6.27 (s, 1H), 3.93 (d, *J* = 7.6 Hz, 1H), 3.83 (s, 3H), 3.14 (dd, *J*<sub>1</sub> = 18.4 Hz, *J*<sub>2</sub> = 2.8 Hz, 1H), 3.10 (s, 3H), 3.04 (dd, *J*<sub>1</sub> = 18.4 Hz, *J*<sub>2</sub> = 9.2 Hz, 1H). <sup>13</sup>C{<sup>1</sup>H} NMR (100 MHz, CDCl<sub>3</sub>): δ 175.2, 161.5, 155.0, 140.2, 140.0, 131.7, 130.0, 129.6, 127.7, 126.6, 124.81, 124.77, 112.5, 112.0, 102.6, 97.7, 55.9, 34.8, 31.9, 26.3. HRMS (ESI) *m/z*: [M+H]<sup>+</sup> Calcd for C<sub>20</sub>H<sub>18</sub>N<sub>3</sub>O<sub>2</sub> 332.1394; Found 332.1391.

**2-Fluoro-11-methyl-13,13a-dihydrobenzo[2,3]pyrrolo[2',3':5,6][1,4]diazepino[1,7-a]indol-12(11H)-one**

**(4j)**

Eluent: petroleum ether/ethyl acetate 6:1). White solid (38.3 mg, 60%), mp 214.8-215.8 °C. <sup>1</sup>H NMR (600 MHz, CDCl<sub>3</sub>): δ 7.72-7.71 (m, 1H), 7.53 (dd, *J*<sub>1</sub> = 9.0 Hz, *J*<sub>2</sub> = 4.2 Hz, 1H), 7.42 (dd, *J*<sub>1</sub> = 7.8 Hz, *J*<sub>2</sub> = 0.6 Hz, 1H), 7.38-7.35 (m, 1H), 7.29-7.24 (m, 2H), 6.94 (td, *J*<sub>1</sub> = 9.0 Hz, *J*<sub>2</sub> = 2.4 Hz, 1H), 6.33 (s, 1H), 3.98 (d, *J* = 7.8 Hz, 1H), 3.16 (dd, *J*<sub>1</sub> = 18.0 Hz, *J*<sub>2</sub> = 2.4 Hz, 1H), 3.12 (s, 3H), 3.07 (dd, *J*<sub>1</sub> = 18.6 Hz, *J*<sub>2</sub> = 9.0 Hz, 1H). <sup>13</sup>C{<sup>1</sup>H} NMR (150 MHz, CDCl<sub>3</sub>): δ 175.1, 161.5, 158.4 (d, <sup>1</sup>*J*<sub>C-F</sub> = 235.8 Hz), 141.3, 140.1, 133.1, 129.7, 129.4 (d, <sup>3</sup>*J*<sub>C-F</sub>



= 9.0 Hz), 127.8, 127.0, 124.9, 124.7, 112.0 (d,  $^3J_{C-F}$  = 9.0 Hz), 110.8 (d,  $^2J_{C-F}$  = 25.2 Hz), 105.8 (d,  $^2J_{C-F}$  = 23.1 Hz), 97.9 (d,  $^4J_{C-F}$  = 4.1 Hz), 34.8, 31.8, 26.4.  $^{19}\text{F}$  NMR (376 MHz,  $\text{CDCl}_3$ ):  $\delta$  -122.65 (td,  $J_1$  = 9.0 Hz,  $J_2$  = 4.1 Hz). HRMS (ESI)  $m/z$ :  $[\text{M}+\text{H}]^+$  Calcd for  $\text{C}_{19}\text{H}_{15}\text{FN}_3\text{O}$  320.1194; Found 320.1178.

**2-Chloro-11-methyl-13,13a-dihydrobenzo[2,3]pyrrolo[2',3':5,6][1,4]diazepino[1,7-*a*]indol-12(11*H*)-one (4k)**

Eluent: petroleum ether/ethyl acetate (6:1). Yellow solid (34.2 mg, 51%), mp 209.2-210.4 °C.  $^1\text{H}$  NMR (600 MHz,  $\text{CDCl}_3$ ):  $\delta$  7.69 (d,  $J$  = 8.4 Hz, 1H), 7.56 (d,  $J$  = 1.8 Hz, 1H), 7.51 (d,  $J$  = 9.0 Hz, 1H), 7.42 (dd,  $J_1$  = 8.4 Hz,  $J_2$  = 1.2 Hz, 1H), 7.38-7.36 (m, 1H), 7.29-7.26 (m, 1H), 7.14 (dd,  $J_1$  = 9.0 Hz,  $J_2$  = 1.8 Hz, 1H), 6.30 (s, 1H), 3.98 (d,  $J$  = 7.8 Hz, 1H), 3.15 (dd,  $J_1$  = 18.0 Hz,  $J_2$  = 2.4 Hz, 1H), 3.11 (s, 3H), 3.07 (dd,  $J_1$  = 18.0 Hz,  $J_2$  = 9.0 Hz, 1H).  $^{13}\text{C}\{^1\text{H}\}$  NMR (150 MHz,  $\text{CDCl}_3$ ):  $\delta$  175.0, 161.5, 141.1, 140.2, 134.9, 130.0, 129.5, 127.8, 127.1, 126.7, 124.9, 124.8, 122.9, 120.3, 112.2, 97.5, 34.8, 31.8, 26.4. HRMS (ESI)  $m/z$ :  $[\text{M}+\text{H}]^+$  Calcd for  $\text{C}_{19}\text{H}_{15}\text{ClN}_3\text{O}$  336.0898; Found 336.0883.

**2-Bromo-11-methyl-13,13a-dihydrobenzo[2,3]pyrrolo[2',3':5,6][1,4]diazepino[1,7-*a*]indol-12(11*H*)-one (4l)**

Eluent: petroleum ether/ethyl acetate (6:1). Yellow solid (41.7 mg, 55%), mp 203.7-204.7 °C.  $^1\text{H}$  NMR (600 MHz,  $\text{CDCl}_3$ ):  $\delta$  7.73 (d,  $J$  = 1.8 Hz, 1H), 7.69 (dd,  $J_1$  = 7.8 Hz,  $J_2$  = 0.6 Hz, 1H), 7.47 (d,  $J$  = 9.0 Hz, 1H), 7.42 (dd,  $J_1$  = 7.8 Hz,  $J_2$  = 1.8 Hz, 1H), 7.39-7.36 (m, 1H), 7.29-7.26 (m, 2H), 6.31 (s, 1H), 3.99 (d,  $J$  = 7.8 Hz, 1H), 3.16 (dd,  $J_1$  = 18.6 Hz,  $J_2$  = 3.0 Hz, 1H), 3.12 (s, 3H), 3.08 (dd,  $J_1$  = 18.0 Hz,  $J_2$  = 9.0 Hz, 1H).  $^{13}\text{C}\{^1\text{H}\}$  NMR (150 MHz,  $\text{CDCl}_3$ ):  $\delta$  175.0, 161.5, 141.0, 140.2, 135.2, 130.6, 129.5, 127.8, 127.2, 125.5, 124.9, 124.8, 123.4, 114.2, 112.6, 97.4, 34.8, 31.8, 26.4. HRMS (ESI)  $m/z$ :  $[\text{M}+\text{H}]^+$  Calcd for  $\text{C}_{19}\text{H}_{15}\text{BrN}_3\text{O}$  380.0393; Found 380.0381.

**1,11-Dimethyl-13,13a-dihydrobenzo[2,3]pyrrolo[2',3':5,6][1,4]diazepino[1,7-*a*]indol-12(11*H*)-one (4m)**

Eluent: petroleum ether/ethyl acetate (6:1). White solid (25.8 mg, 41%), mp 218.5-218.9 °C. <sup>1</sup>H NMR (400 MHz, CDCl<sub>3</sub>): δ 7.77 (d, *J* = 8.0 Hz, 1H), 7.47 (d, *J* = 8.4 Hz, 1H), 7.41 (d, *J* = 7.6 Hz, 1H), 7.35 (t, *J* = 7.2 Hz, 1H), 7.29-7.25 (m, 1H), 7.13 (t, *J* = 7.6 Hz, 1H), 6.98 (d, *J* = 6.8 Hz, 1H), 6.39 (s, 1H), 4.03 (d, *J* = 8.8 Hz, 1H) 3.25-3.06 (m, 5H), 2.55 (s, 3H). <sup>13</sup>C{<sup>1</sup>H} NMR (150 MHz, CDCl<sub>3</sub>): δ 175.3, 161.7, 140.2, 139.3, 136.4, 130.4, 130.0, 128.7, 127.6, 126.8, 125.1, 124.8, 122.8, 121.4, 108.7, 96.4, 34.8, 31.9, 26.3, 18.7. HRMS (ESI) *m/z*: [M+H]<sup>+</sup> Calcd for C<sub>20</sub>H<sub>18</sub>N<sub>3</sub>O 316.1444; Found 316.1444.

**1-Fluoro-11-methyl-13,13a-dihydrobenzo[2,3]pyrrolo[2',3':5,6][1,4]diazepino[1,7-*a*]indol-12(11*H*)-one**  
**(4n)**

Eluent: petroleum ether/ethyl acetate (6:1). White solid (32.5 mg, 51%), mp 182.7-183.7 °C. <sup>1</sup>H NMR (600 MHz, CDCl<sub>3</sub>): δ 7.74 (d, *J* = 7.8 Hz, 1H), 7.43-7.37 (m, 3H), 7.28 (t, *J* = 7.8 Hz, 1H), 7.14-7.11 (m, 1H), 6.86-6.83 (m, 1H), 6.48 (s, 1H), 4.01 (d, *J* = 8.4 Hz, 1H), 3.20 (dd, *J*<sub>1</sub> = 18.6 Hz, *J*<sub>2</sub> = 2.4 Hz, 1H), 3.13-3.08 (m, 4H). <sup>13</sup>C{<sup>1</sup>H} NMR (150 MHz, CDCl<sub>3</sub>): δ 175.0, 161.7, 156.1 (d, <sup>1</sup>*J*<sub>C-F</sub> = 246.0 Hz), 140.2, 139.9, 138.9 (d, <sup>3</sup>*J*<sub>C-F</sub> = 10.5 Hz), 129.6, 127.8, 127.2, 125.0, 124.9, 123.2 (d, <sup>3</sup>*J*<sub>C-F</sub> = 7.5 Hz), 118.0 (d, <sup>2</sup>*J*<sub>C-F</sub> = 21.9 Hz), 107.2 (d, <sup>4</sup>*J*<sub>C-F</sub> = 3.9 Hz), 106.0 (d, <sup>2</sup>*J*<sub>C-F</sub> = 17.4 Hz), 93.9, 34.7, 31.8, 26.4. <sup>19</sup>F NMR (376 MHz, CDCl<sub>3</sub>): δ -121.94 – -121.98 (m). HRMS (ESI) *m/z*: [M+H]<sup>+</sup> Calcd for C<sub>19</sub>H<sub>15</sub>FN<sub>3</sub>O 320.1194; Found 320.1194.

**1-Chloro-11-methyl-13,13a-dihydrobenzo[2,3]pyrrolo[2',3':5,6][1,4]diazepino[1,7-*a*]indol-12(11*H*)-one**  
**(4o)**

Eluent: petroleum ether/ethyl acetate (6:1). White solid (34.8 mg, 52%), mp 191.1-191.8 °C. <sup>1</sup>H NMR (600 MHz, CDCl<sub>3</sub>): δ 7.72 (d, *J* = 7.2 Hz, 1H), 7.52 (d, *J* = 8.4 Hz, 1H), 7.43 (d, *J* = 7.8 Hz, 1H), 7.38 (t, *J* = 7.2 Hz, 1H), 7.28 (t, *J* = 7.2 Hz, 1H), 7.18 (d, *J* = 7.2 Hz, 1H), 7.13 (t, *J* = 7.2 Hz, 1H), 6.51 (s, 1H), 4.03 (d, *J* = 8.4 Hz, 1H) 3.23 (d, *J* = 18.0 Hz, 1H), 3.13-3.09 (m, 4H). <sup>13</sup>C{<sup>1</sup>H} NMR (150 MHz, CDCl<sub>3</sub>): δ 175.0, 161.6, 140.5, 140.3, 137.2, 129.5, 127.8, 127.7, 127.3, 126.1, 125.0, 124.9, 123.2, 120.9, 109.8, 96.6, 34.8, 31.8, 26.4. HRMS (ESI) *m/z*: [M+H]<sup>+</sup> Calcd for C<sub>19</sub>H<sub>15</sub>ClN<sub>3</sub>O 336.0898; Found 336.0890.

**4-Fluoro-11-methyl-13,13a-dihydrobenzo[2,3]pyrrolo[2',3':5,6][1,4]diazepino[1,7-a]indol-12(11H)-one**

**(4p)**

Eluent: petroleum ether/ethyl acetate (6:1). White solid (33.8 mg, 53%), mp 172.6-173.0 °C. <sup>1</sup>H NMR (600 MHz, CDCl<sub>3</sub>): δ 7.47 (t, *J* = 7.8 Hz, 1H), 7.39 (d, *J* = 7.8 Hz, 1H), 7.35-7.33 (m, 2H), 7.24-7.21 (m, 1H), 7.11-7.08 (m, 1H), 6.95-6.92 (m, 1H), 6.45 (s, 1H), 3.95 (d, *J* = 7.8 Hz, 1H), 3.17-3.14 (m, 4H), 3.08 (dd, *J*<sub>1</sub> = 18.0 Hz, *J*<sub>2</sub> = 9.0 Hz, 1H). <sup>13</sup>C{<sup>1</sup>H} NMR (150 MHz, CDCl<sub>3</sub>): δ 175.0, 161.9, 149.3 (d, <sup>1</sup>*J*<sub>C-F</sub> = 247.3 Hz), 142.4, 140.2, 132.7 (d, <sup>3</sup>*J*<sub>C-F</sub> = 3.8 Hz), 130.1 (d, <sup>4</sup>*J*<sub>C-F</sub> = 2.1 Hz), 127.0, 126.8 (d, <sup>5</sup>*J*<sub>C-F</sub> = 7.1 Hz), 126.2, 124.3 (d, <sup>2</sup>*J*<sub>C-F</sub> = 8.4 Hz), 124.2, 121.5 (d, <sup>3</sup>*J*<sub>C-F</sub> = 7.2 Hz), 116.6 (d, <sup>4</sup>*J*<sub>C-F</sub> = 3.3 Hz), 109.1 (d, <sup>2</sup>*J*<sub>C-F</sub> = 19.2 Hz), 99.5 (d, <sup>4</sup>*J*<sub>C-F</sub> = 2.1 Hz), 34.6, 32.0, 26.4. <sup>19</sup>F NMR (565 MHz, CDCl<sub>3</sub>): δ -121.97 – -122.01 (m). HRMS (ESI) *m/z*: [M+H]<sup>+</sup> Calcd for C<sub>19</sub>H<sub>15</sub>FN<sub>3</sub>O 320.1194; Found 320.1189.

**4-Chloro-11-methyl-13,13a-dihydrobenzo[2,3]pyrrolo[2',3':5,6][1,4]diazepino[1,7-a]indol-12(11H)-one**

**(4q)**

Eluent: petroleum ether/ethyl acetate (6:1). White solid (33.5 mg, 50%), mp 173.0-174.0 °C. <sup>1</sup>H NMR (400 MHz, CDCl<sub>3</sub>): δ 7.54 (dd, *J*<sub>1</sub> = 8.0 Hz, *J*<sub>2</sub> = 0.8 Hz, 1H), 7.36-7.33 (m, 2H), 7.30-7.16 (m, 3H), 7.11 (t, *J* = 8.0 Hz, 1H), 6.48 (d, *J* = 1.2 Hz, 1H), 3.96-3.93 (m, 1H), 3.18-3.12 (m, 4H), 3.07 (dd, *J*<sub>1</sub> = 18.4 Hz, *J*<sub>2</sub> = 8.8 Hz, 1H). <sup>13</sup>C{<sup>1</sup>H} NMR (150 MHz, CDCl<sub>3</sub>): δ 175.0, 162.5, 144.1, 141.0, 132.8, 131.9, 129.5, 129.0, 127.1, 125.6, 125.0, 123.3, 121.9, 119.4, 117.7, 99.9, 34.7, 32.0, 26.4. HRMS (ESI) *m/z*: [M+H]<sup>+</sup> Calcd for C<sub>19</sub>H<sub>15</sub>ClN<sub>3</sub>O 336.0898; Found 336.0890.

**8-Methoxy-11-methyl-13,13a-dihydrobenzo[2,3]pyrrolo[2',3':5,6][1,4]diazepino[1,7-a]indol-12(11H)-one**

**(4r)**

Eluent: petroleum ether/ethyl acetate (6:1). White solid (27.2 mg, 41%), mp 201.0-202.8 °C. <sup>1</sup>H NMR (400 MHz, CDCl<sub>3</sub>): δ 7.66 (d, *J* = 9.2 Hz, 1H), 7.61 (d, *J* = 7.6 Hz, 1H), 7.58 (d, *J* = 8.0 Hz, 1H), 7.22-7.13 (m, 2H), 6.93 (d, *J* = 2.8 Hz, 1H), 6.84 (dd, *J*<sub>1</sub> = 8.8 Hz, *J*<sub>2</sub> = 2.8 Hz, 1H), 6.35 (s, 1H), 4.00 (d, *J* = 8.4 Hz, 1H), 3.88 (s,

3H), 3.18 (dd,  $J_1 = 18.4$  Hz,  $J_2 = 2.4$  Hz, 1H), 3.10-3.03 (m, 4H).  $^{13}\text{C}\{^1\text{H}\}$  NMR (100 MHz,  $\text{CDCl}_3$ ):  $\delta$  175.6, 162.3, 158.5, 141.7, 139.9, 137.0, 129.1, 126.2, 123.5, 122.9, 121.32, 121.26, 112.2, 111.5, 111.3, 97.8, 56.1, 35.3, 32.2, 26.7. HRMS (ESI)  $m/z$ :  $[\text{M}+\text{H}]^+$  Calcd for  $\text{C}_{20}\text{H}_{18}\text{N}_3\text{O}_2$  332.1394; Found 332.1385.

**7-Fluoro-11-methyl-13,13a-dihydrobenzo[2,3]pyrrolo[2',3':5,6][1,4]diazepino[1,7-*a*]indol-12(11*H*)-one**  
**(4s)**

Eluent: petroleum ether/ethyl acetate (6:1). Red solid (30.6 mg, 48%), mp 117.0-118.0 °C.  $^1\text{H}$  NMR (600 MHz,  $\text{CDCl}_3$ ):  $\delta$  7.64-7.62 (m, 2H), 7.51 (dd,  $J_1 = 9.0$  Hz,  $J_2 = 1.8$  Hz, 1H), 7.38 (dd,  $J_1 = 8.4$  Hz,  $J_2 = 6.0$  Hz, 1H), 7.24 (d,  $J = 8.4$  Hz, 1H), 7.19 (t,  $J = 7.2$  Hz, 1H), 7.10-7.07 (m, 1H), 6.38 (s, 1H), 4.01 (d,  $J = 8.4$  Hz, 1H), 3.18 (d,  $J = 18.6$  Hz, 1H), 3.10-3.07 (m, 4H).  $^{13}\text{C}\{^1\text{H}\}$  NMR (150 MHz,  $\text{CDCl}_3$ ):  $\delta$  175.0, 161.5, 159.1 (d,  $^1J_{\text{C-F}} = 243.0$  Hz), 139.6, 136.6 (d,  $^4J_{\text{C-F}} = 2.7$  Hz), 136.4, 130.5 (d,  $^3J_{\text{C-F}} = 10.5$  Hz), 129.1 (d,  $^3J_{\text{C-F}} = 8.1$  Hz), 129.0, 123.0, 121.6, 121.1, 114.0 (d,  $^2J_{\text{C-F}} = 21.6$  Hz), 111.6 (d,  $^2J_{\text{C-F}} = 24.9$  Hz), 110.9, 98.6, 34.7, 31.9, 26.3.  $^{19}\text{F}$  NMR (565 MHz,  $\text{CDCl}_3$ ):  $\delta$  -116.62 – -116.66 (m). HRMS (ESI)  $m/z$ :  $[\text{M}+\text{H}]^+$  Calcd for  $\text{C}_{19}\text{H}_{15}\text{FN}_3\text{O}$  320.1194; Found 320.1186.

**7-Chloro-11-methyl-13,13a-dihydrobenzo[2,3]pyrrolo[2',3':5,6][1,4]diazepino[1,7-*a*]indol-12(11*H*)-one**  
**(4t)**

Eluent: petroleum ether/ethyl acetate (6:1). White solid (30.1 mg, 45%), mp 234.9-235.3 °C.  $^1\text{H}$  NMR (400 MHz,  $\text{CDCl}_3$ ):  $\delta$  7.78 (d,  $J = 2.0$  Hz, 1H), 7.63 (d,  $J = 8.4$  Hz, 2H), 7.36-7.30 (m, 2H), 7.28-7.24 (m, 1H), 7.20 (t,  $J = 7.6$  Hz, 1H), 6.39 (s, 1H), 4.01 (dd,  $J_1 = 8.8$  Hz,  $J_2 = 1.6$  Hz, 1H), 3.19 (dd,  $J_1 = 18.4$  Hz,  $J_2 = 2.8$  Hz, 1H), 3.13-3.06 (m, 4H).  $^{13}\text{C}\{^1\text{H}\}$  NMR (100 MHz,  $\text{CDCl}_3$ ):  $\delta$  175.0, 161.9, 139.6, 138.8, 136.4, 130.7, 129.7, 129.0, 128.9, 126.9, 124.7, 123.1, 121.6, 121.1, 110.9, 98.7, 34.8, 31.9, 26.4. HRMS (ESI)  $m/z$ :  $[\text{M}+\text{H}]^+$  Calcd for  $\text{C}_{19}\text{H}_{15}\text{ClN}_3\text{O}$  336.0898; Found 336.0891.

**7-Bromo-11-methyl-13,13a-dihydrobenzo[2,3]pyrrolo[2',3':5,6][1,4]diazepino[1,7-*a*]indol-12(11*H*)-one**  
**(4u)**

Eluent: petroleum ether/ethyl acetate (6:1). Red solid (34.9 mg, 46%), mp 243.8-244.7 °C. <sup>1</sup>H NMR (600 MHz, CDCl<sub>3</sub>): δ 7.91 (s, 1H), 7.61 (d, *J* = 7.8 Hz, 2H), 7.45 (d, *J* = 7.2 Hz, 1H), 7.28-7.24 (m, 2H), 7.19 (t, *J* = 7.2 Hz, 1H), 6.38 (s, 1H), 3.98 (d, *J* = 8.4 Hz, 1H), 3.17 (d, *J* = 18.0 Hz, 1H), 3.10-3.06 (m, 4H). <sup>13</sup>C{<sup>1</sup>H} NMR (150 MHz, CDCl<sub>3</sub>): δ 175.0, 161.9, 139.6, 139.3, 136.4, 131.0, 129.8, 129.2, 129.0, 127.6, 123.1, 121.6, 121.1, 117.1, 110.8, 98.7, 34.8, 31.9, 26.4. HRMS (ESI) *m/z*: [M+H]<sup>+</sup> Calcd for C<sub>19</sub>H<sub>15</sub>BrN<sub>3</sub>O 380.0393; Found 380.0390.

**11-Ethyl-13,13a-dihydrobenzo[2,3]pyrrolo[2',3':5,6][1,4]diazepino[1,7-*a*]indol-12(11*H*)-one (4v)**

Eluent: petroleum ether/ethyl acetate (6:1). White solid (31.5 mg, 50%), mp 179.5-180.5 °C. <sup>1</sup>H NMR (600 MHz, CDCl<sub>3</sub>): δ 7.78 (d, *J* = 7.8 Hz, 1H), 7.65-7.63 (m, 2H), 7.41 (d, *J* = 7.2 Hz, 1H), 7.36 (t, *J* = 7.8 Hz, 1H), 7.27 (t, *J* = 7.8 Hz, 1H), 7.22 (t, *J* = 7.8 Hz, 1H), 7.18 (t, *J* = 7.2 Hz, 1H), 6.38 (s, 1H), 4.00 (d, *J* = 8.4 Hz, 1H), 3.78-3.73 (m, 1H), 3.69-3.64 (m, 1H), 3.17 (dd, *J*<sub>1</sub> = 18.0 Hz, *J*<sub>2</sub> = 2.4 Hz, 1H), 3.07 (dd, *J*<sub>1</sub> = 18.6 Hz, *J*<sub>2</sub> = 8.4 Hz, 1H), 1.19 (t, *J* = 7.2 Hz, 3H). <sup>13</sup>C{<sup>1</sup>H} NMR (150 MHz, CDCl<sub>3</sub>): δ 175.0, 161.0, 140.2, 140.0, 136.6, 129.9, 129.0, 127.7, 126.7, 124.9, 124.7, 122.6, 121.1, 120.9, 111.1, 97.9, 35.0, 34.7, 31.9, 12.6. HRMS (ESI) *m/z*: [M+H]<sup>+</sup> Calcd for C<sub>20</sub>H<sub>18</sub>N<sub>3</sub>O 316.1444; Found 316.1433.

**11-Benzyl-13,13a-dihydrobenzo[2,3]pyrrolo[2',3':5,6][1,4]diazepino[1,7-*a*]indol-12(11*H*)-one (4w)**

Eluent: petroleum ether/ethyl acetate (6:1). Gray solid (31.7 mg, 42%), mp 249.5-250.1 °C. <sup>1</sup>H NMR (600 MHz, CDCl<sub>3</sub>): δ 7.77 (d, *J* = 7.8 Hz, 1H), 7.63 (d, *J* = 8.4 Hz, 2H), 7.42-7.39 (m, 3H), 7.35-7.33 (m, 1H), 7.27-7.20 (m, 5H), 7.17 (t, *J* = 7.8 Hz, 1H), 6.38 (s, 1H), 4.86 (d, *J* = 13.8 Hz, 1H), 4.74 (d, *J* = 14.4 Hz, 1H), 4.01 (d, *J* = 8.4 Hz, 1H), 3.19 (dd, *J*<sub>1</sub> = 18.6 Hz, *J*<sub>2</sub> = 2.4 Hz, 1H), 3.08 (dd, *J*<sub>1</sub> = 18.0 Hz, *J*<sub>2</sub> = 9.0 Hz, 1H). <sup>13</sup>C{<sup>1</sup>H} NMR (150 MHz, CDCl<sub>3</sub>): δ 175.0, 160.8, 140.1, 139.9, 136.6, 136.0, 129.9, 129.0, 128.8, 128.5, 127.8, 127.7, 126.7, 124.9, 124.8, 122.6, 121.1, 120.9, 111.1, 98.1, 43.5, 34.8, 31.9. HRMS (ESI) *m/z*: [M+H]<sup>+</sup> Calcd for C<sub>25</sub>H<sub>20</sub>N<sub>3</sub>O 378.1601; Found 378.1599.

**11-Isobutyl-13,13a-dihydrobenzo[2,3]pyrrolo[2',3':5,6][1,4]diazepino[1,7-*a*]indol-12(11*H*)-one (4x)**

Eluent: petroleum ether/ethyl acetate (6:1). White solid (30.8 mg, 45%), mp 240.4-241.5 °C. <sup>1</sup>H NMR (400 MHz, CDCl<sub>3</sub>): δ 7.78 (d, *J* = 7.6 Hz, 1H), 7.65-7.62 (m, 2H), 7.39 (dd, *J*<sub>1</sub> = 8.0 Hz, *J*<sub>2</sub> = 1.6 Hz, 1H), 7.37-7.33 (m, 1H), 7.29-7.27 (m, 1H), 7.22-7.16 (m, 2H), 6.38 (s, 1H), 4.00 (d, *J* = 7.6 Hz, 1H), 3.53 (dd, *J*<sub>1</sub> = 13.2 Hz, *J*<sub>2</sub> = 7.6 Hz, 1H), 3.44 (dd, *J*<sub>1</sub> = 13.2 Hz, *J*<sub>2</sub> = 7.6 Hz, 1H), 3.19 (dd, *J*<sub>1</sub> = 18.4 Hz, *J*<sub>2</sub> = 2.4 Hz, 1H), 3.08 (dd, *J*<sub>1</sub> = 18.4 Hz, *J*<sub>2</sub> = 9.2 Hz, 1H), 2.19-2.09 (m, 1H), 0.84-0.80 (m, 6H). <sup>13</sup>C{<sup>1</sup>H} NMR (100 MHz, CDCl<sub>3</sub>): δ 175.5, 161.6, 140.3, 140.1, 136.5, 129.8, 129.0, 127.7, 126.7, 124.9, 124.6, 122.5, 121.1, 120.9, 111.1, 97.7, 47.1, 34.6, 31.7, 26.5, 20.1, 20.0. HRMS (ESI) *m/z*: [M+H]<sup>+</sup> Calcd for C<sub>22</sub>H<sub>22</sub>N<sub>3</sub>O 344.1757; Found 344.1757.

**10-Methyl-12,12a-dihydrobenzo[*b*]dipyrrolo[1,2-*d*:3',2'-*f*][1,4]diazepin-11(10*H*)-one (4y)**

Eluent: petroleum ether/ethyl acetate (6:1). Yellow solid (26.1 mg, 52%), mp 127.2-128.0 °C. <sup>1</sup>H NMR (600 MHz, CDCl<sub>3</sub>): δ 7.46 (dd, *J*<sub>1</sub> = 8.4 Hz, *J*<sub>2</sub> = 1.2 Hz, 1H), 7.36-7.34 (m, 1H), 7.30 (td, *J*<sub>1</sub> = 7.2 Hz, *J*<sub>2</sub> = 1.2 Hz, 1H), 7.23-7.20 (m, 1H), 7.08-7.07 (m, 1H), 6.36-6.35 (m, 1H), 6.02-6.01 (m, 1H), 3.83 (dd, *J*<sub>1</sub> = 8.4 Hz, *J*<sub>2</sub> = 3.0 Hz, 1H), 3.14 (s, 3H), 3.11-3.02 (m, 2H). <sup>13</sup>C{<sup>1</sup>H} NMR (150 MHz, CDCl<sub>3</sub>): δ 175.5, 161.6, 138.6, 131.9, 131.6, 128.0, 126.6, 125.3, 123.8, 121.5, 110.4, 104.2, 34.3, 32.2, 26.3. HRMS (ESI) *m/z*: [M+H]<sup>+</sup> Calcd for C<sub>15</sub>H<sub>14</sub>N<sub>3</sub>O 252.1131; Found 252.1134.

### 3. Typical procedure for the synthesis of 5a and spectroscopic data of 5a-5f<sup>2</sup>

To a reaction tube equipped with a stir bar were added **3a** (63.8 mg, 0.2 mmol), DMF (2 mL), DEAD (31.5  $\mu$ L, 0.2 mmol) and  $K_2CO_3$  (138.2 mg, 1 mmol) with stirring. The mixture was stirred at room temperature for 2 h. Afterwards, it was quenched with water, filtered through a pad of celite, and extracted with  $CH_2Cl_2$  (10 mL  $\times$  3). The combined organic phases were dried over anhydrous  $Na_2SO_4$ , and concentrated under reduced pressure. The residue was purified by silica gel chromatography using petroleum ether/ethyl acetate (6:1) as eluent to afford **5a**. **5b-5f** were obtained in a similar manner.

#### 3-(1-(2-Aminophenyl)-1*H*-indol-2-yl)-1-methyl-1*H*-pyrrole-2,5-dione (**5a**)

Eluent: petroleum ether/ethyl acetate (6:1). Yellow solid (39.9 mg, 63%), mp 197.5-198.4  $^{\circ}C$ .  $^1H$  NMR (400 MHz,  $CDCl_3$ ):  $\delta$  7.93 (s, 1H), 7.74 (d,  $J = 7.6$  Hz, 1H), 7.34 (t,  $J = 7.2$  Hz, 1H), 7.26-7.25 (m, 1H), 7.18 (t,  $J = 7.6$  Hz, 1H), 7.08 (d,  $J = 7.2$  Hz, 1H), 6.99 (d,  $J = 8.0$  Hz, 1H), 6.90-6.85 (m, 2H), 5.54 (s, 1H), 3.50 (br s, 2H), 2.98 (s, 3H).  $^{13}C\{^1H\}$  NMR (100 MHz,  $CDCl_3$ ):  $\delta$  171.3, 170.5, 144.2, 140.5, 134.4, 131.0, 129.7, 128.2, 127.9, 126.0, 122.7, 122.5, 121.6, 119.3, 118.7, 116.6, 112.7, 110.7, 23.8. HRMS (ESI)  $m/z$ :  $[M+H]^+$  Calcd for  $C_{19}H_{16}N_3O_2$  318.1237; Found 318.1228.

#### 3-(1-(2-Aminophenyl)-6-methyl-1*H*-indol-2-yl)-1-methyl-1*H*-pyrrole-2,5-dione (**5b**)

Eluent: petroleum ether/ethyl acetate (6:1). Yellow solid (46.5 mg, 70%), mp 195.4-195.8  $^{\circ}C$ .  $^1H$  NMR (600 MHz,  $CDCl_3$ ):  $\delta$  7.89 (s, 1H), 7.61 (d,  $J = 8.4$  Hz, 1H), 7.35-7.32 (m, 1H), 7.07 (dd,  $J_1 = 7.2$  Hz,  $J_2 = 1.2$  Hz, 1H), 7.01 (d,  $J = 7.8$  Hz, 1H), 6.90-6.86 (m, 2H), 6.76 (s, 1H), 5.47 (s, 1H), 3.52 (s, 2H), 2.96 (s, 3H), 2.39 (s, 3H).  $^{13}C\{^1H\}$  NMR (150 MHz,  $CDCl_3$ ):  $\delta$  171.4, 170.6, 144.3, 141.0, 136.7, 134.5, 130.9, 129.7, 127.8, 125.9, 123.7, 122.7, 122.3, 119.3, 117.7, 116.6, 112.8, 110.4, 23.8, 22.1. HRMS (ESI)  $m/z$ :  $[M+H]^+$  Calcd for  $C_{20}H_{18}N_3O_2$  332.1394; Found 332.1381.

#### 3-(1-(2-Aminophenyl)-5-methyl-1*H*-indol-2-yl)-1-methyl-1*H*-pyrrole-2,5-dione (**5c**)

Eluent: petroleum ether/ethyl acetate (6:1). Yellow solid (40.5 mg, 61%), mp 198.7-199.7 °C. <sup>1</sup>H NMR (600 MHz, CDCl<sub>3</sub>): δ 7.85 (s, 1H), 7.51 (s, 1H), 7.34-7.31 (m, 1H), 7.09 (dd, *J*<sub>1</sub> = 8.4 Hz, *J*<sub>2</sub> = 1.2 Hz, 1H), 7.06 (dd, *J*<sub>1</sub> = 7.2 Hz, *J*<sub>2</sub> = 1.2 Hz, 1H), 6.89-6.85 (m, 3H), 5.51 (s, 1H), 3.50 (s, 2H), 2.98 (s, 3H), 2.44 (s, 3H). <sup>13</sup>C{<sup>1</sup>H} NMR (150 MHz, CDCl<sub>3</sub>): δ 171.4, 170.5, 144.2, 139.1, 134.5, 131.0, 130.9, 129.6, 128.2, 128.1, 127.9, 122.7, 122.0, 119.3, 118.3, 116.6, 112.2, 110.4, 23.8, 21.4. HRMS (ESI) *m/z*: [M+H]<sup>+</sup> Calcd for C<sub>20</sub>H<sub>18</sub>N<sub>3</sub>O<sub>2</sub> 332.1394; Found 332.1385.

**3-(1-(2-Aminophenyl)-4-fluoro-1*H*-indol-2-yl)-1-methyl-1*H*-pyrrole-2,5-dione (5d)**

Eluent: petroleum ether/ethyl acetate (6:1). Yellow solid (38.2 mg, 57%), mp 218.3-220.5 °C. <sup>1</sup>H NMR (600 MHz, CDCl<sub>3</sub>): δ 8.00 (s, 1H), 7.37-7.34 (m, 1H), 7.20-7.17 (m, 1H), 7.09 (dd, *J*<sub>1</sub> = 7.2 Hz, *J*<sub>2</sub> = 1.2 Hz, 1H), 6.92-6.88 (m, 2H), 6.86-6.83 (m, 1H), 6.78 (d, *J* = 8.4 Hz, 1H), 5.57 (s, 1H), 3.51 (s, 2H), 3.01 (s, 3H). <sup>13</sup>C{<sup>1</sup>H} NMR (150 MHz, CDCl<sub>3</sub>): δ 171.1, 170.2, 157.2 (d, <sup>1</sup>*J*<sub>C-F</sub> = 250.8 Hz), 144.0, 142.5 (d, <sup>3</sup>*J*<sub>C-F</sub> = 10.4 Hz), 134.0, 131.2, 129.5, 128.1, 126.5 (d, <sup>3</sup>*J*<sub>C-F</sub> = 7.7 Hz), 122.2, 119.6, 119.4, 117.6 (d, <sup>2</sup>*J*<sub>C-F</sub> = 23.0 Hz), 116.7, 108.3, 106.8 (d, <sup>4</sup>*J*<sub>C-F</sub> = 2.6 Hz), 106.1 (d, <sup>2</sup>*J*<sub>C-F</sub> = 18.5 Hz), 23.9. <sup>19</sup>F NMR (565 MHz, CDCl<sub>3</sub>): δ -119.46 – -119.48 (m). HRMS (ESI) *m/z*: [M+Na]<sup>+</sup> Calcd for C<sub>19</sub>H<sub>14</sub>FN<sub>3</sub>O<sub>2</sub>Na 358.0962; Found 358.0954.

**3-(1-(2-Aminophenyl)-7-chloro-1*H*-indol-2-yl)-1-methyl-1*H*-pyrrole-2,5-dione (5e)**

Eluent: petroleum ether/ethyl acetate (6:1). Yellow solid (46.6 mg, 66%), mp 191.1-193.0 °C. <sup>1</sup>H NMR (600 MHz, CDCl<sub>3</sub>): δ 7.97 (s, 1H), 7.67 (d, *J* = 8.4 Hz, 1H), 7.34 (t, *J* = 7.8 Hz, 1H), 7.25 (d, *J* = 7.2 Hz, 1H), 7.10 (t, *J* = 7.8 Hz, 1H), 7.07 (d, *J* = 7.8 Hz, 1H), 6.85-6.82 (m, 2H), 5.48 (s, 1H), 3.56 (s, 2H), 3.02 (s, 3H). <sup>13</sup>C{<sup>1</sup>H} NMR (150 MHz, CDCl<sub>3</sub>): δ 171.1, 170.4, 145.2, 135.2, 133.8, 131.3, 130.6, 130.4, 129.8, 127.3, 123.9, 122.0, 121.5, 120.3, 118.8, 117.5, 116.0, 113.0, 23.9. HRMS (ESI) *m/z*: [M+H]<sup>+</sup> Calcd for C<sub>19</sub>H<sub>15</sub>ClN<sub>3</sub>O<sub>2</sub> 352.0847; Found 352.0844.

**3-(1-(2-Amino-5-chlorophenyl)-1*H*-indol-2-yl)-1-methyl-1*H*-pyrrole-2,5-dione (5f)**



Eluent: petroleum ether/ethyl acetate (6:1). Yellow solid (41.8 mg, 60%), mp 191.3-191.6 °C. <sup>1</sup>H NMR (600 MHz, CDCl<sub>3</sub>): δ 7.93 (s, 1H), 7.74 (d, *J* = 8.4 Hz, 1H), 7.33-7.28 (m, 2H), 7.20 (t, *J* = 1.2 Hz, 1H), 7.10 (d, *J* = 2.4 Hz, 1H), 6.99 (d, *J* = 8.4 Hz, 1H), 6.85 (d, *J* = 9.0 Hz, 1H), 5.63 (s, 1H), 3.57 (s, 2H), 3.00 (s, 3H). <sup>13</sup>C{<sup>1</sup>H} NMR (150 MHz, CDCl<sub>3</sub>): δ 171.1, 170.3, 143.0, 140.4, 134.2, 131.0, 129.4, 128.0, 127.9, 126.3, 123.3, 123.2, 122.8, 121.9, 118.8, 117.4, 113.2, 110.6, 23.9. HRMS (ESI) *m/z*: [M+Na]<sup>+</sup> Calcd for C<sub>19</sub>H<sub>14</sub>ClN<sub>3</sub>O<sub>2</sub>Na 374.0667; Found 374.0657.

### III. Mechanism studies

#### 1. Studies on the reversibility of C–H bond cleavage

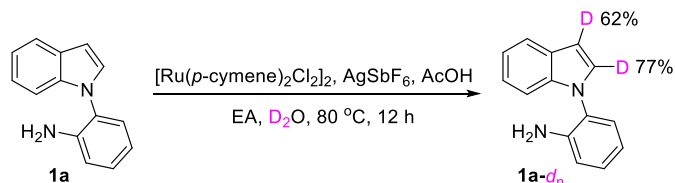

To a reaction tube equipped with a stir bar were charged with 2-(1*H*-indol-1-yl)aniline (**1a**, 41.6 mg, 0.2 mmol),  $[\text{Ru}(p\text{-cymene})\text{Cl}_2]_2$  (6.12 mg, 0.01 mmol),  $\text{AgSbF}_6$  (13.7 mg, 0.04 mmol),  $\text{AcOH}$  (57  $\mu\text{L}$ , 1.0 mmol),  $\text{EA}$  (2 mL) and  $\text{D}_2\text{O}$  (72  $\mu\text{L}$ , 4 mmol). The tube was sealed, and the resulting mixture was stirred at  $80\text{ }^\circ\text{C}$  under air for 12 h. Upon analyzing the  $^1\text{H}$  NMR spectrum of the resulting mixture, the deuteration percentages at the  $\alpha$ - and  $\beta$ -position of the indole moiety of **1a** were calculated as 77% and 62%.

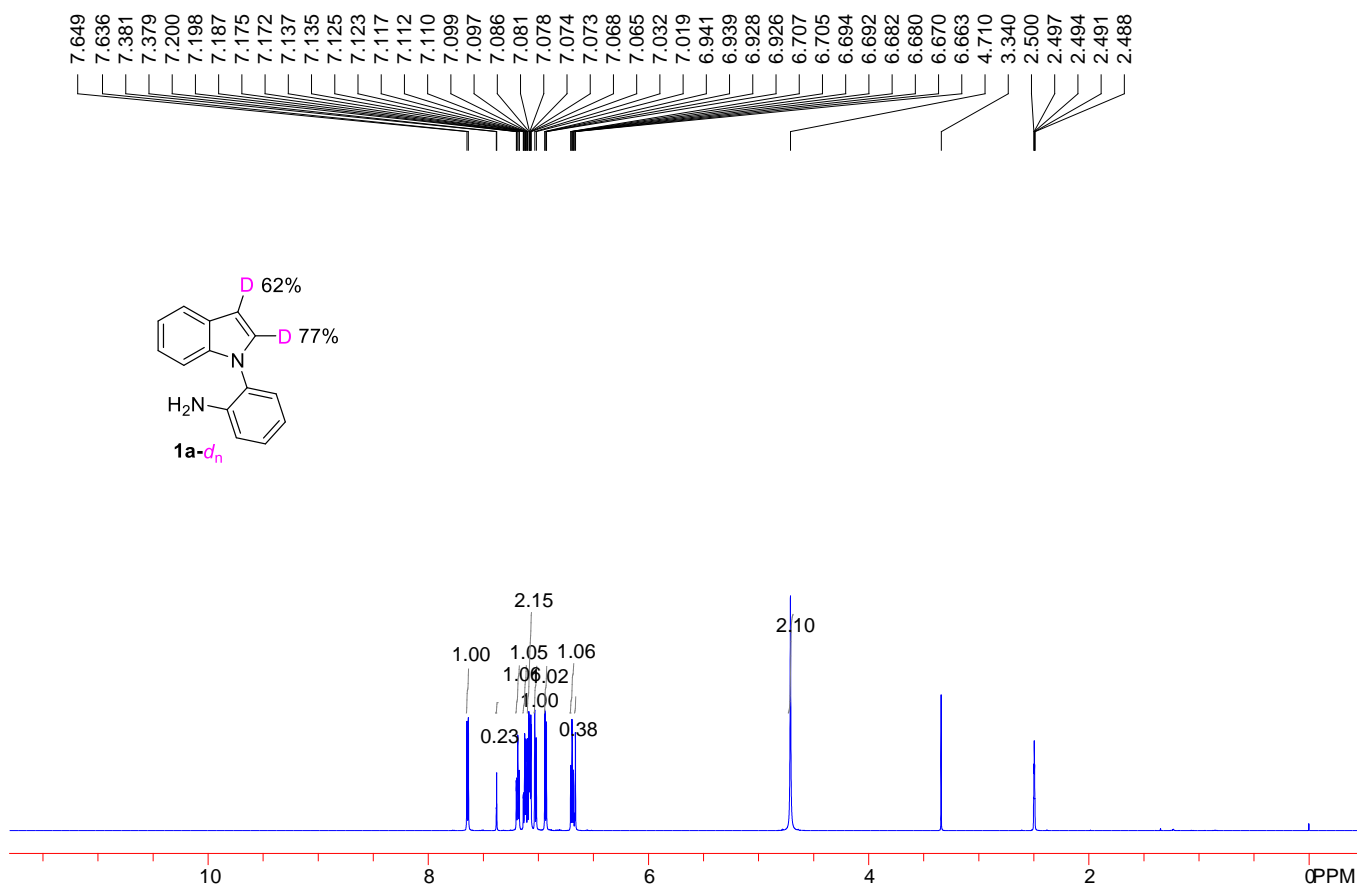

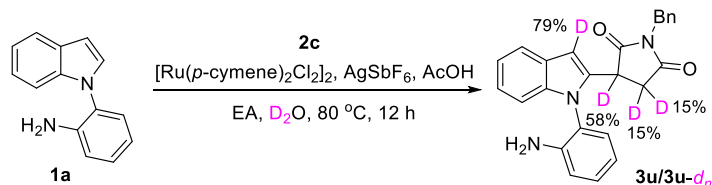

To a reaction tube equipped with a stir bar were added 2-(1*H*-indol-1-yl)aniline (**1a**, 41.6 mg, 0.2 mmol), EA (2 mL),  $\text{D}_2\text{O}$  (72  $\mu\text{L}$ , 4 mmol), *N*-benzyl maleimide (**2c**, 56.2 mg, 0.3 mmol),  $[\text{Ru}(p\text{-cymene})\text{Cl}_2]_2$  (6.12 mg, 0.01 mmol),  $\text{AgSbF}_6$  (13.7 mg, 0.04 mmol) and  $\text{AcOH}$  (57  $\mu\text{L}$ , 1.0 mmol) with stirring. The mixture was stirred at  $80\text{ }^\circ\text{C}$  under air for 12 h. Afterwards, it was cooled to room temperature, quenched with saturated aqueous solution of  $\text{NaHCO}_3$  (1 mL), filtered through a pad of celite, and extracted with  $\text{CH}_2\text{Cl}_2$  (10 mL  $\times$  3). The combined organic phases were dried over anhydrous  $\text{Na}_2\text{SO}_4$ , and concentrated under reduced pressure. The residue was purified by silica gel chromatography using petroleum ether/ethyl acetate (4:1) as eluent to afford a mixture of **3u** and **3u-d<sub>n</sub>**. Upon analyzing the  $^1\text{H}$  NMR spectrum of the mixture, the deuteration percentages on the secondary and tertiary carbon center of the succinimide unit of **3u** were calculated to be 15% and 58%. Meanwhile, 79% deuteration on the  $\beta$ -position of the indole scaffold was also observed.

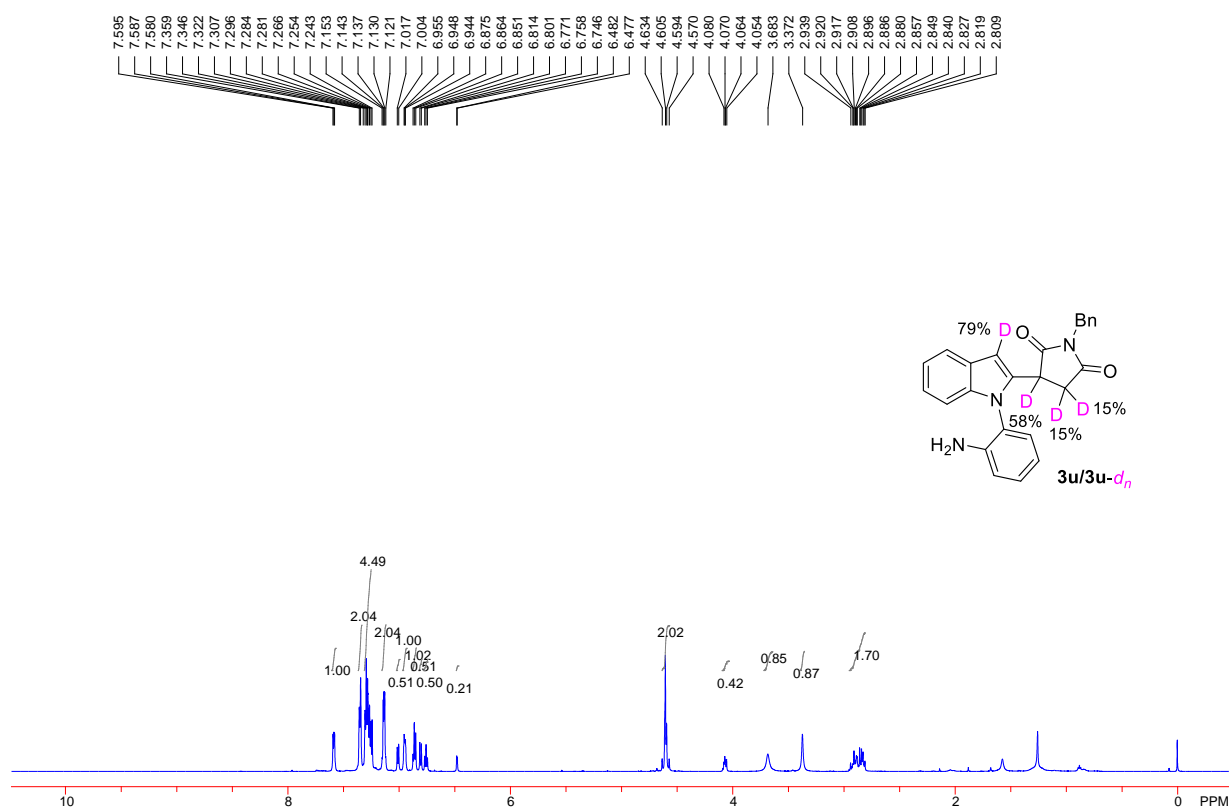

## 2. Electronic competition experiment

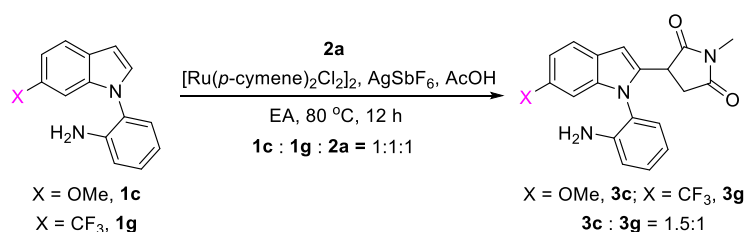

To a reaction tube equipped with a stir bar were added 2-(6-methoxy-1*H*-indol-1-yl)aniline (**1c**, 47.6 mg, 0.2 mmol), 2-(6-(trifluoromethyl)-1*H*-indol-1-yl)aniline (**1g**, 55.3 mg, 0.2 mmol), [Ru(*p*-cymene)Cl<sub>2</sub>]<sub>2</sub> (6.12 mg, 0.01 mmol), AgSbF<sub>6</sub> (13.7 mg, 0.04 mmol), AcOH (57  $\mu$ L, 1.0 mmol), EA (2 mL) and *N*-methylmaleimide (**2a**, 22.2 mg, 0.2 mmol). The mixture was stirred at 80 °C under air for 12 h. Afterwards, it was cooled to room temperature, quenched with saturated aqueous solution of NaHCO<sub>3</sub> (1 mL), filtered through a pad of celite, and extracted with CH<sub>2</sub>Cl<sub>2</sub> (10 mL  $\times$  3). The combined organic phases were dried over anhydrous Na<sub>2</sub>SO<sub>4</sub>, and concentrated under reduced pressure. The residue was purified by silica gel chromatography using petroleum ether/ethyl acetate (4:1) as eluent to afford a mixture of **3c** and **3g**. Upon analyzing the <sup>1</sup>H NMR spectrum of the mixture, the ratio of **3c** to **3g** was determined to be about 1.5:1.

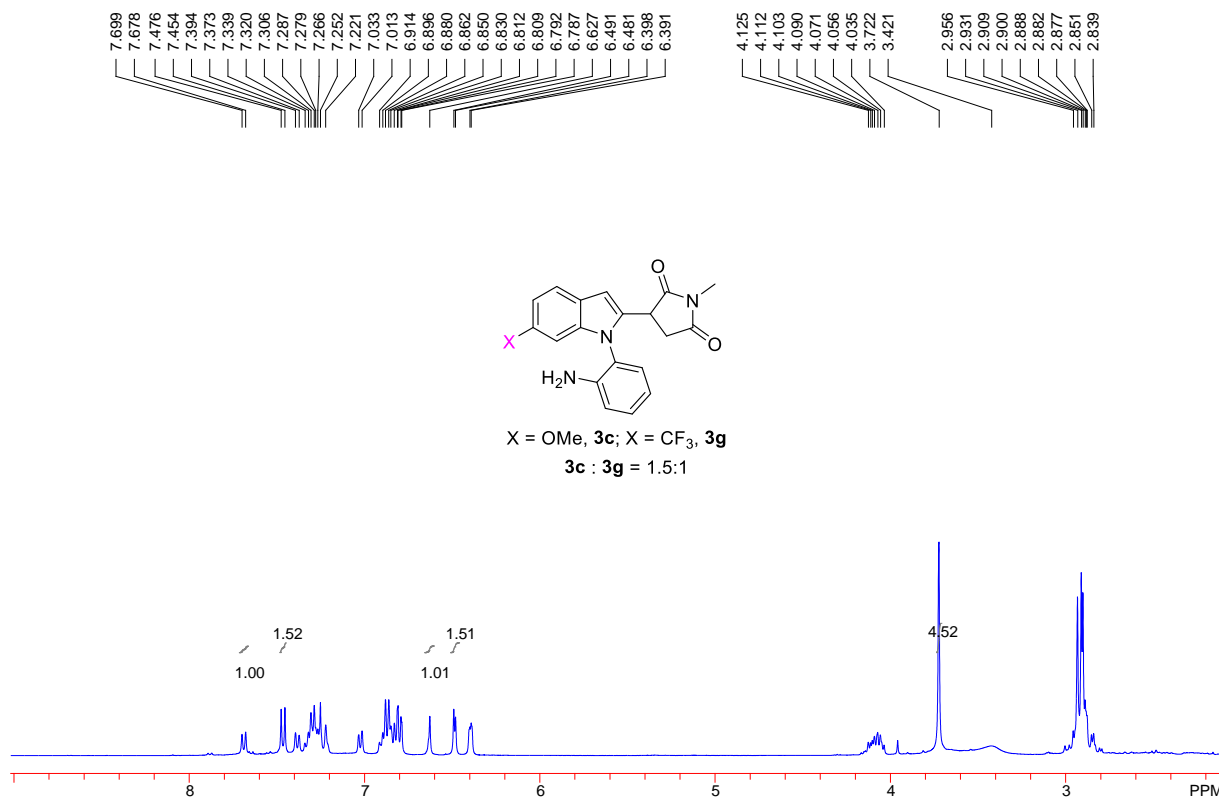

#### IV. Cell antiproliferative activity assay

Cell antiproliferative activity was evaluated by the CellTiter-Glo (Promega, USA) assay. Make 1000× compounds solution in DMSO, Add 1 μL 1000 × compounds to 49 μL growth medium to make 20 × compounds. Dilute cell suspensions in growth medium to desired density and 95 μL were taken to 96-well plate. Add 5 μL 20 × compounds into 96-well plate according to the plate map. Final DMSO concentration in each well was 0.1%. Then the cell was incubated at 37 °C, 5% CO<sub>2</sub> for 72 h. Equilibrate the assay plate to room temperature before measurement. Add 20 μL of CellTiter-Glo® Reagent into each well. Mix contents for 2 minutes on an orbital shaker to induce cell lysis. Incubate at room temperature for 10 minutes to stabilize luminescent signal. Record luminescence using EnVision Multilabel Reader (PerkinElmer). Cell viability (CV%) was calculated relative to vehicle (DMSO) treated control wells using following formula: Cell viability(%) = (RLU compound -RLU blank)/(RLU control-RLU blank)\*100%. The IC<sub>50</sub> values were calculated using GraphPad Prism 6.0 software, fitting to a 4-parameter equation to generate concentration response curves. All assays were conducted with two parallel samples and two repetitions, and 5-fluorouracil was used as the positive control.

## V. NMR spectra of 3a-3v

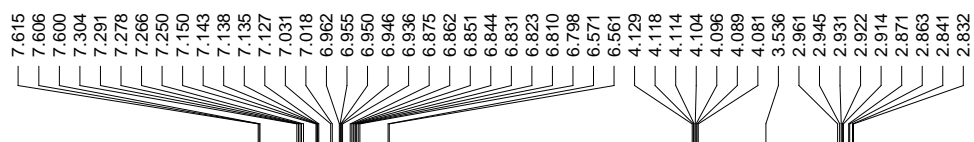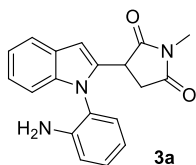

<sup>1</sup>H NMR (600 MHz, CDCl<sub>3</sub>)

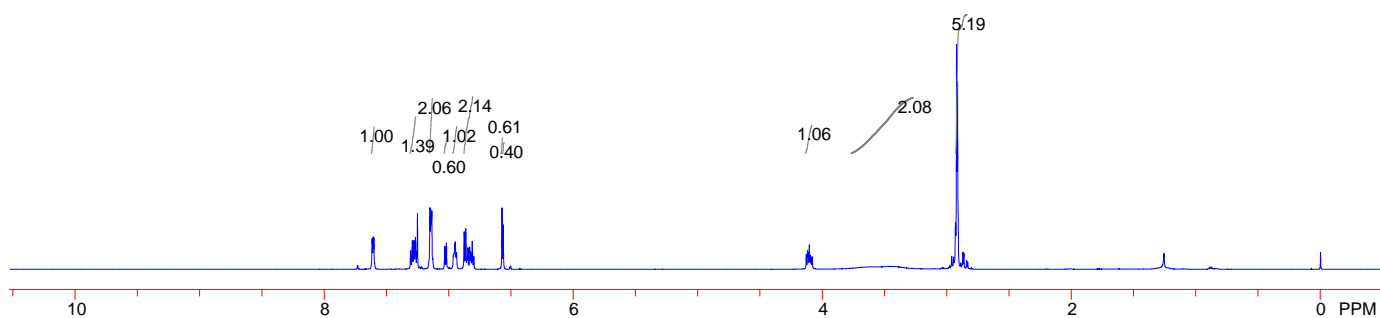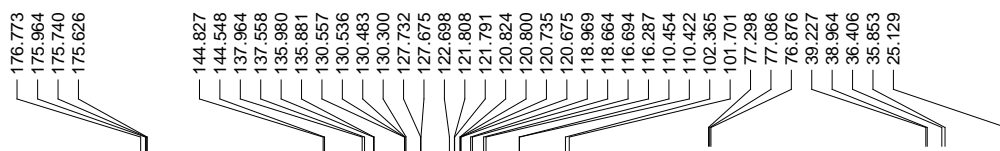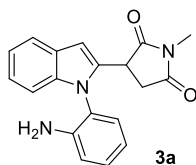

<sup>13</sup>C{<sup>1</sup>H} (150 MHz, CDCl<sub>3</sub>)

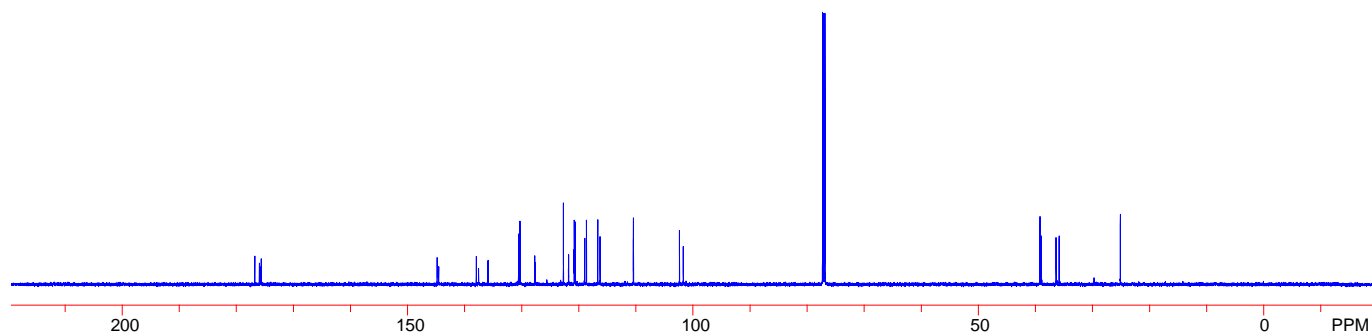

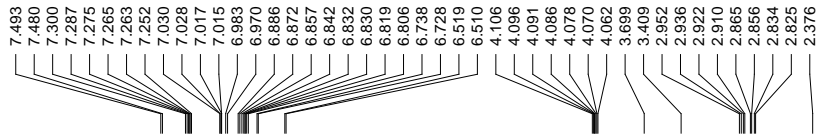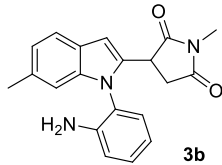

$^1\text{H NMR}$  (600 MHz,  $\text{CDCl}_3$ )

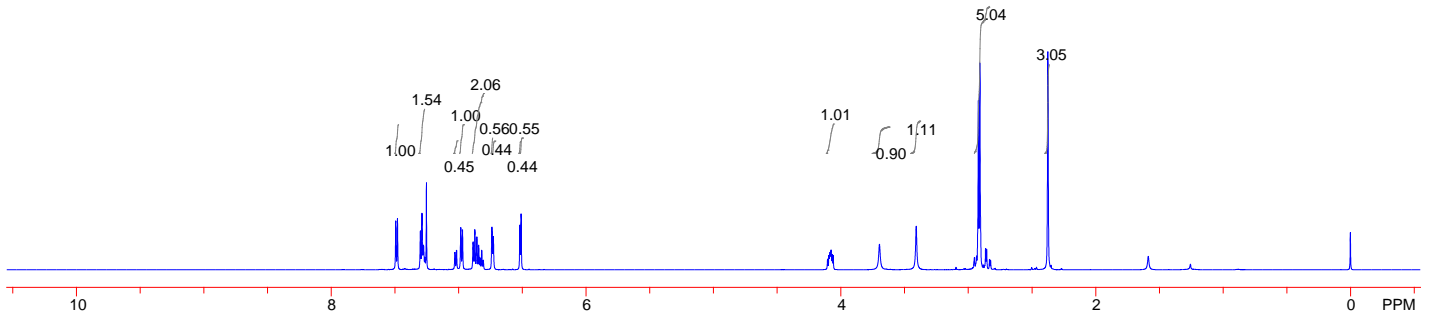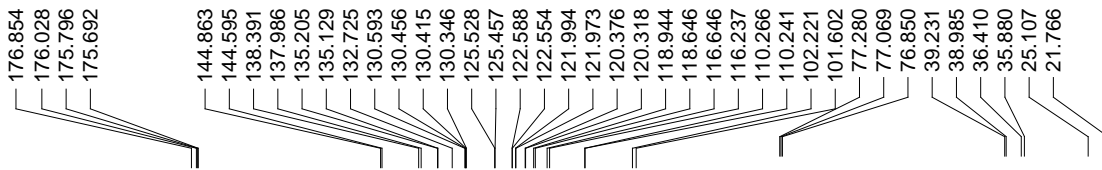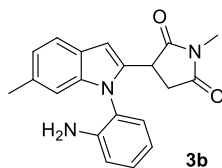

$^{13}\text{C}\{^1\text{H}\}$  (150 MHz,  $\text{CDCl}_3$ )

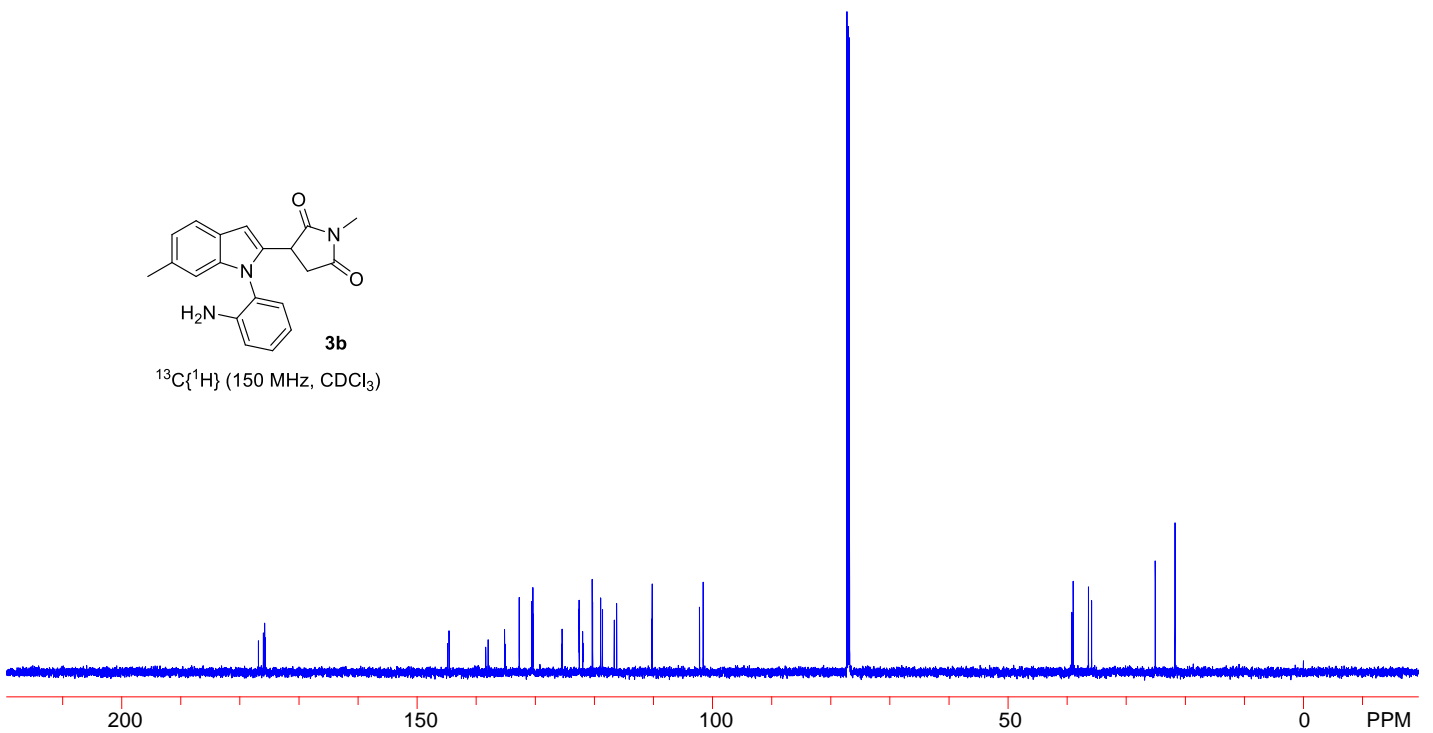

7.481  
7.466  
7.310  
7.298  
7.286  
7.273  
7.257  
7.039  
7.037  
7.026  
7.023  
6.866  
6.873  
6.856  
6.842  
6.831  
6.829  
6.816  
6.812  
6.802  
6.798  
6.498  
6.488  
6.406  
6.403  
6.394  
6.391  
4.085  
4.085  
4.079  
4.074  
4.070  
4.065  
4.058  
4.050  
3.733  
3.729  
3.712  
3.425  
2.951  
2.943  
2.936  
2.921  
2.896  
2.909  
2.896  
2.872  
2.863  
2.854  
2.846  
2.824  
2.815

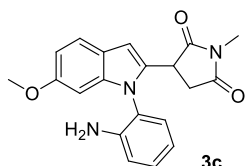

$^1\text{H NMR}$  (600 MHz,  $\text{CDCl}_3$ )

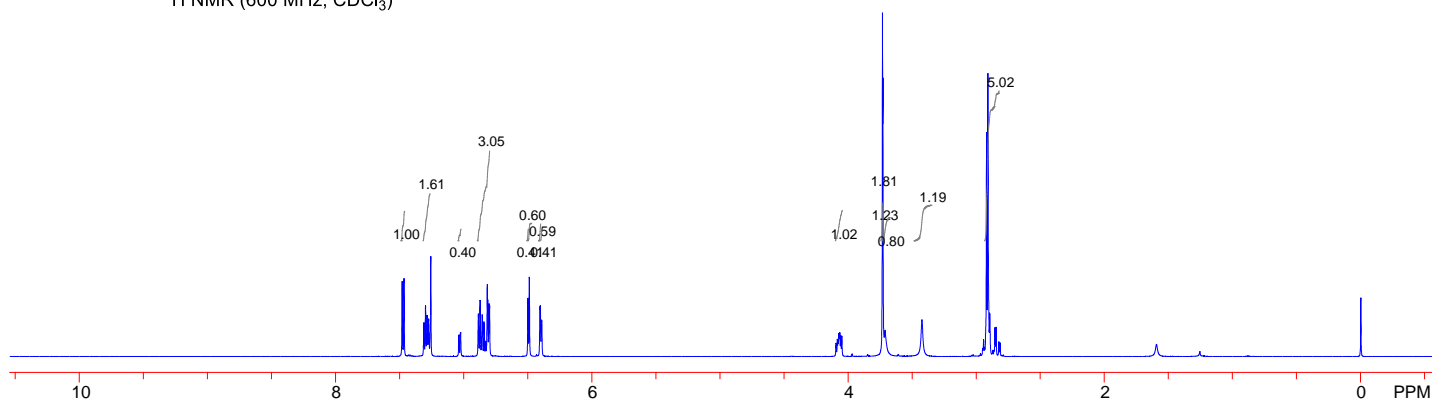

176.901  
176.088  
175.790  
175.694  
157.058  
144.781  
144.521  
138.790  
138.395  
134.641  
134.545  
130.528  
130.503  
130.459  
130.284  
121.822  
121.755  
121.364  
121.310  
118.957  
118.679  
116.682  
116.285  
110.767  
110.736  
102.329  
101.675  
93.813  
93.773  
77.275  
77.063  
76.853  
55.701  
39.263  
38.999  
36.435  
35.890  
25.099

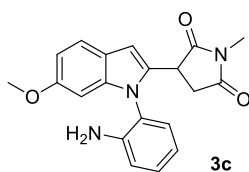

$^{13}\text{C}\{^1\text{H}\}$  (150 MHz,  $\text{CDCl}_3$ )

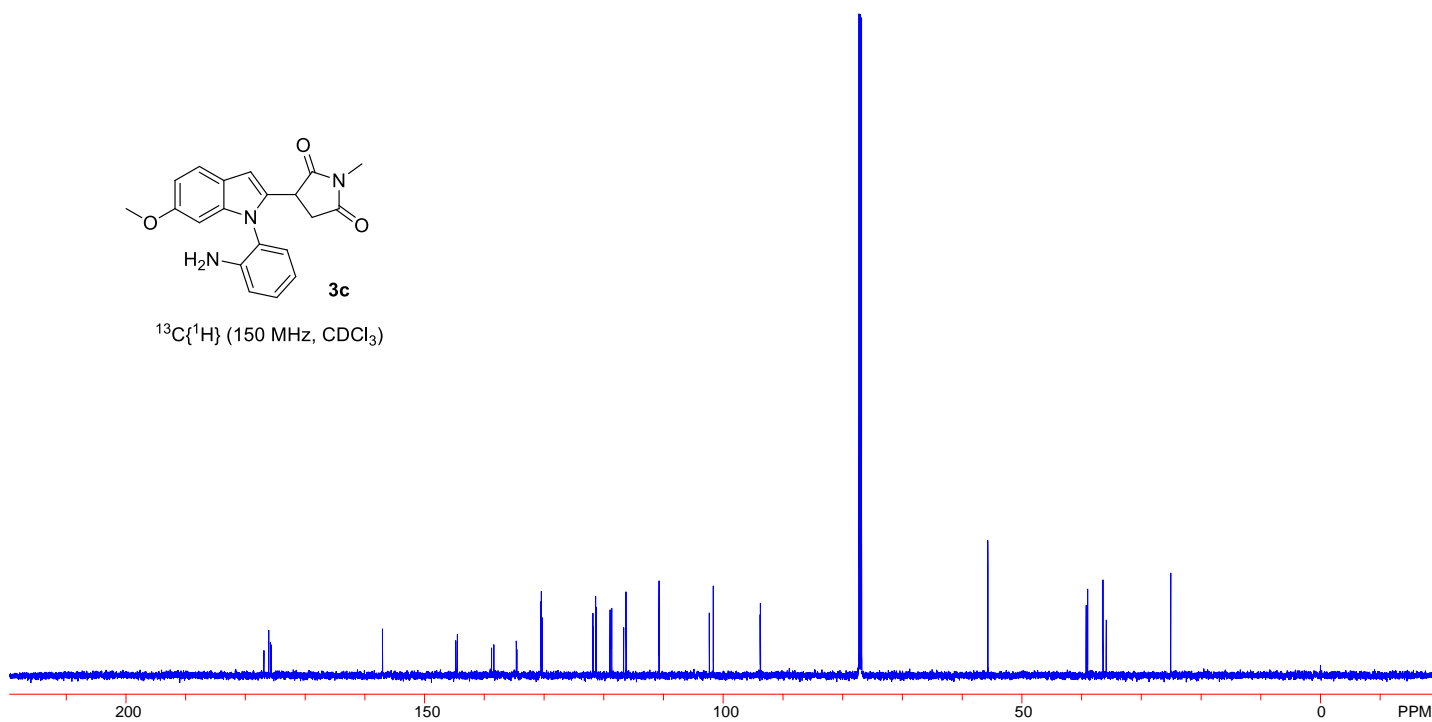



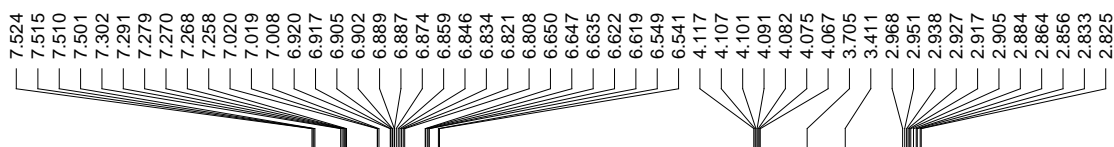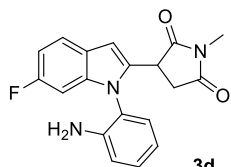

$^1\text{H NMR}$  (600 MHz,  $\text{CDCl}_3$ )

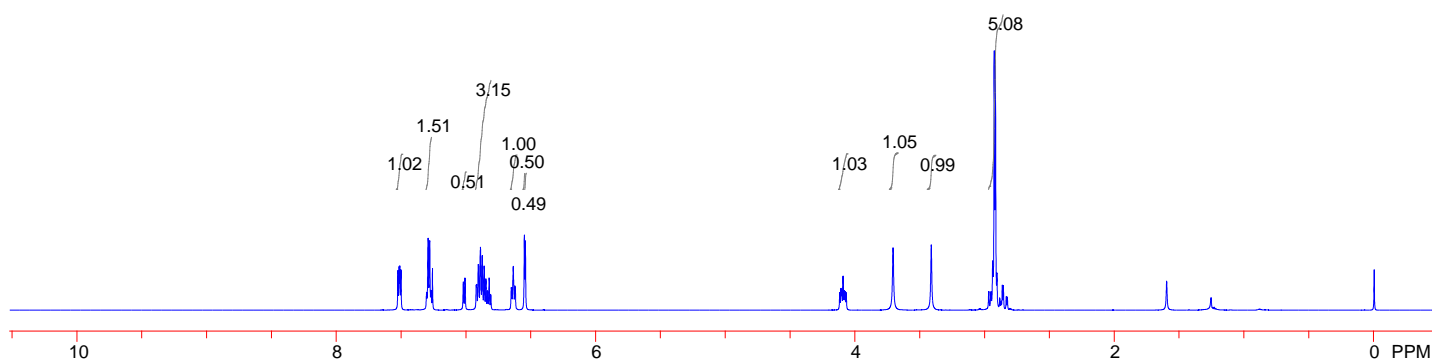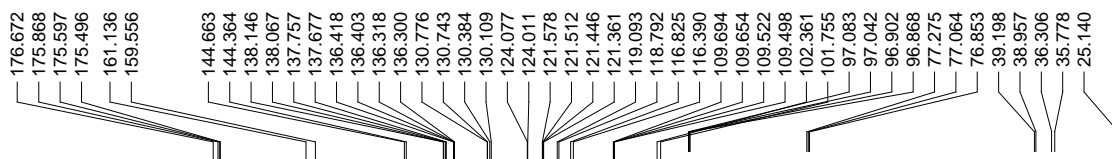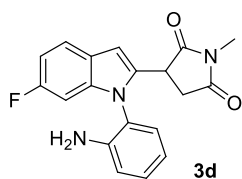

$^{13}\text{C}\{^1\text{H}\}$  (150 MHz,  $\text{CDCl}_3$ )

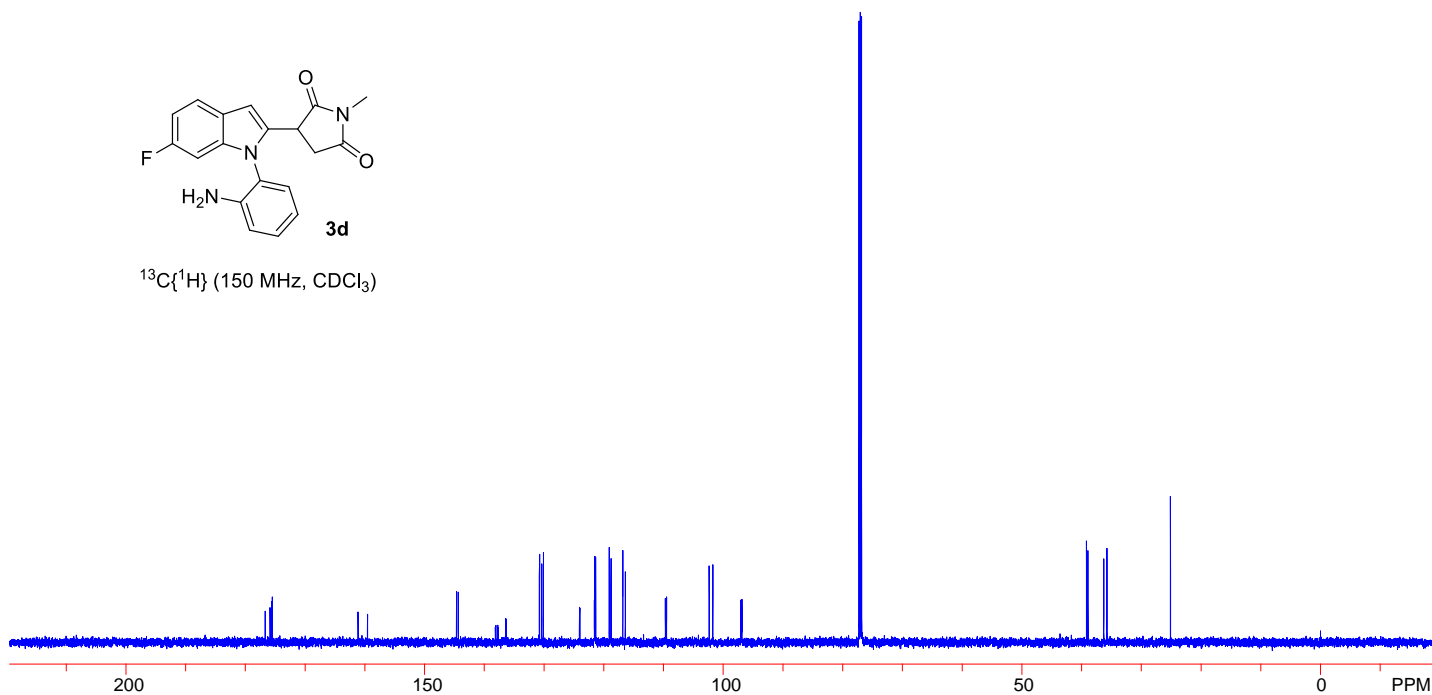

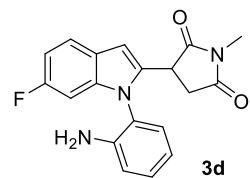

$^{19}\text{F}$  NMR (565 MHz,  $\text{CDCl}_3$ )

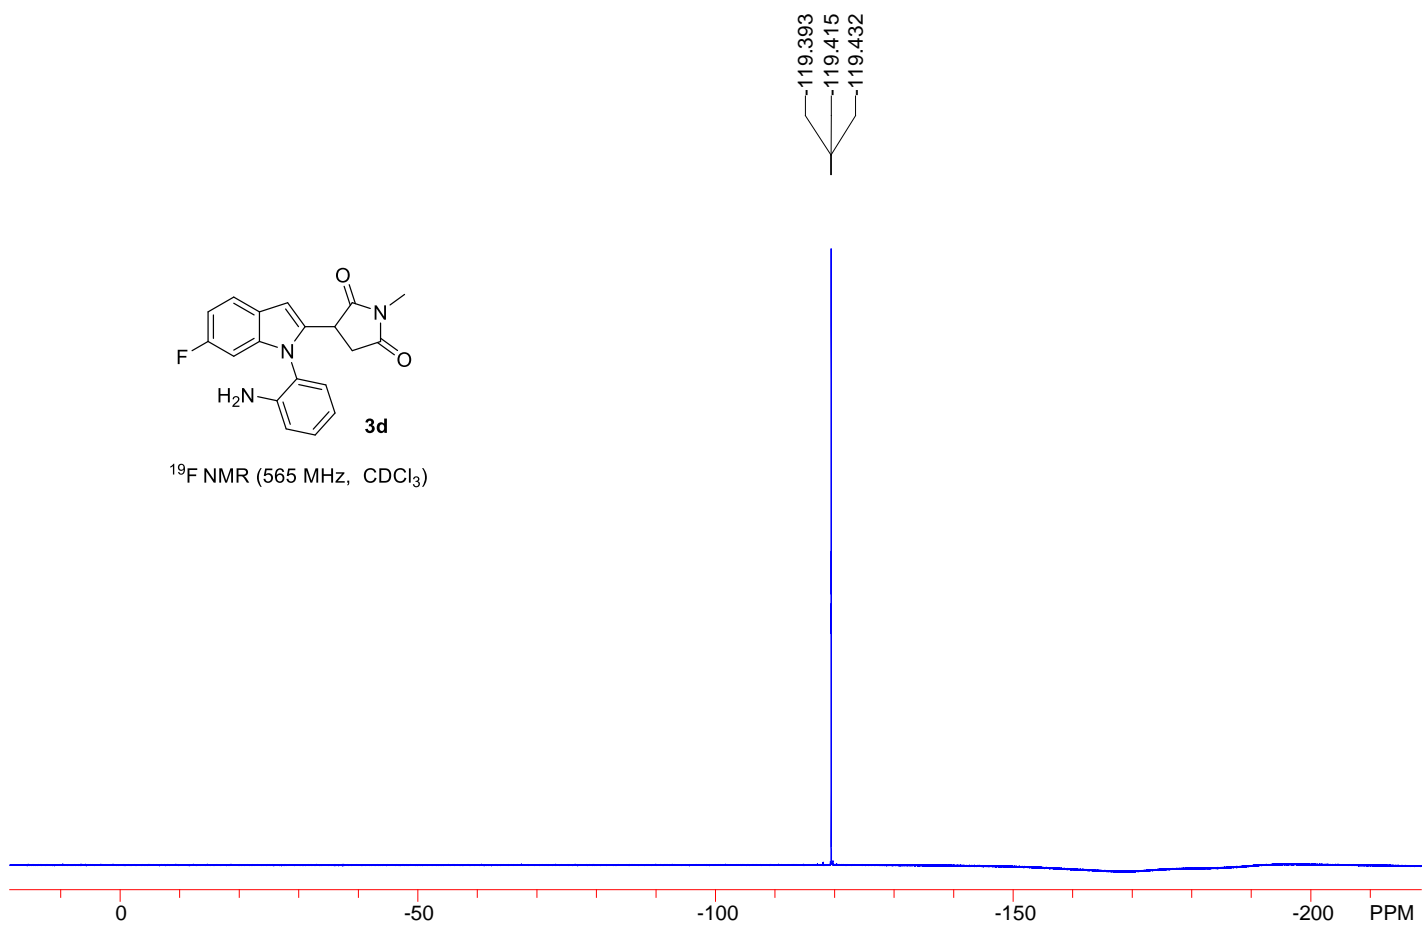

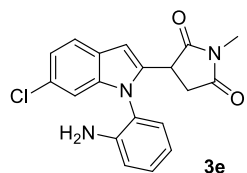

$^1\text{H NMR}$  (600 MHz,  $\text{CDCl}_3$ )

7.509  
7.495  
7.306  
7.295  
7.281  
7.269  
7.257  
7.113  
7.111  
7.099  
7.097  
7.009  
6.998  
6.944  
6.931  
6.884  
6.871  
6.857  
6.843  
6.835  
6.821  
6.809  
6.546  
6.537  
4.114  
4.104  
4.088  
4.088  
4.081  
4.073  
4.065  
4.057  
3.699  
3.408  
2.960  
2.944  
2.929  
2.919  
2.916  
2.898  
2.876  
2.866  
2.859  
2.850  
2.828  
2.819

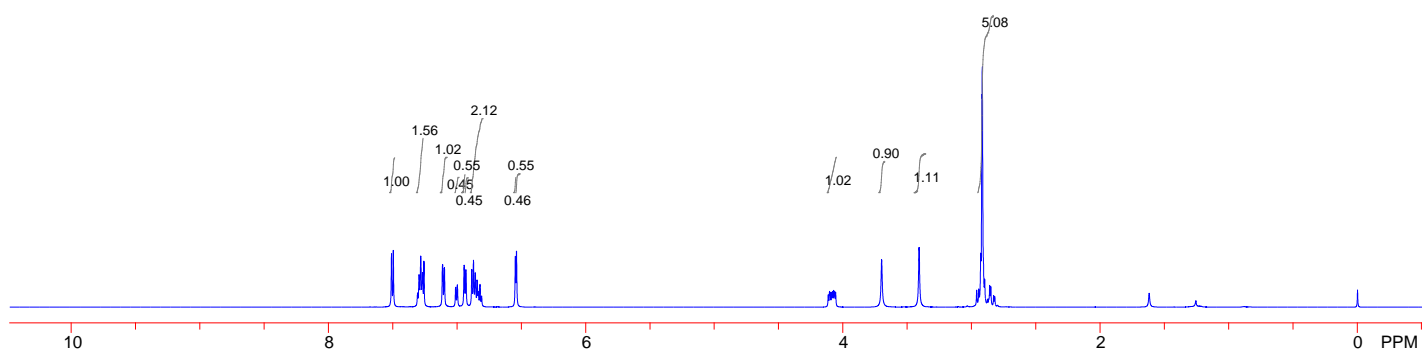

176.552  
175.740  
175.523  
175.413  
144.679  
144.377  
138.365  
137.952  
136.840  
136.720  
130.864  
130.825  
130.423  
130.151  
128.729  
126.224  
126.164  
121.628  
121.593  
121.560  
121.140  
119.106  
118.805  
116.862  
116.431  
110.454  
110.408  
102.417  
101.748  
77.301  
77.089  
76.879  
39.166  
38.899  
36.222  
35.710  
25.164

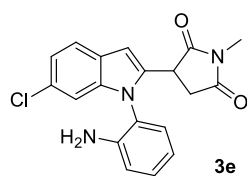

$^{13}\text{C}\{^1\text{H}\}$  (150 MHz,  $\text{CDCl}_3$ )

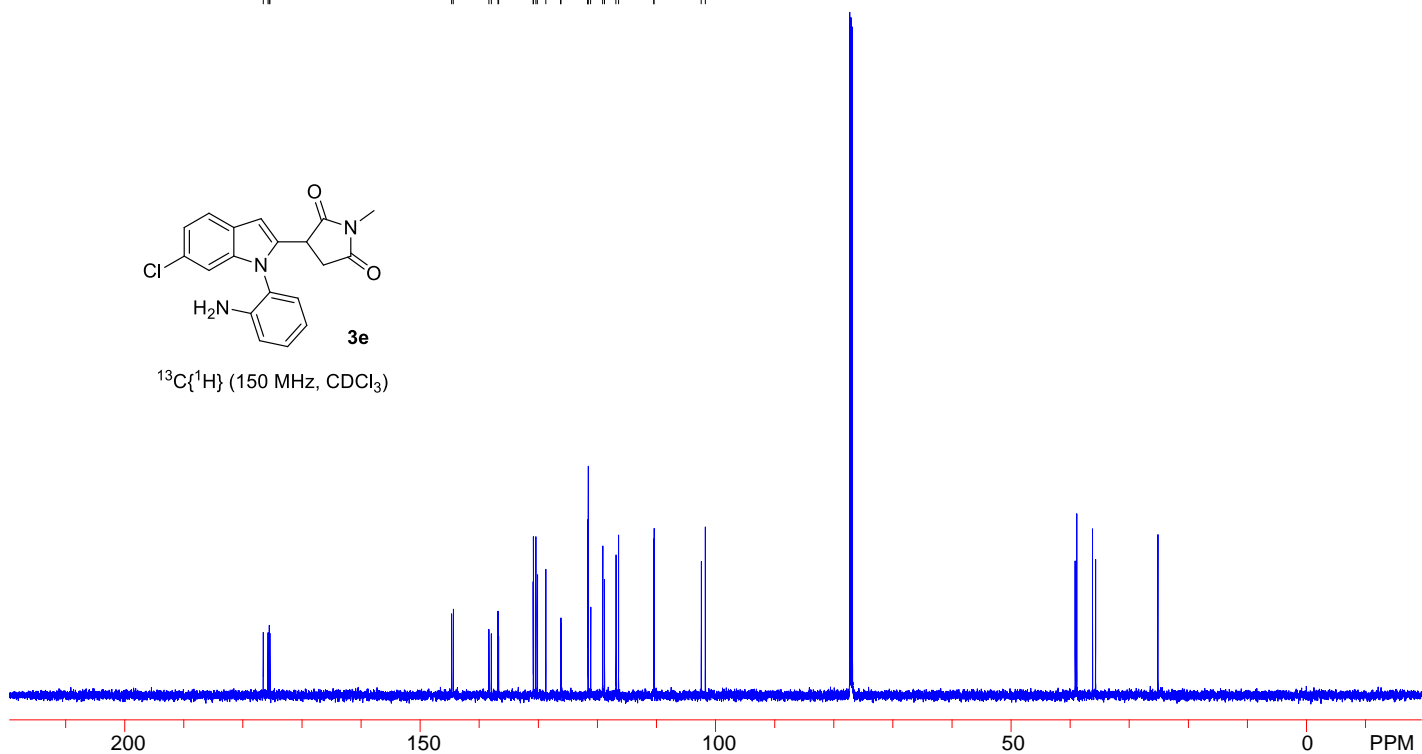

7.562  
7.548  
7.541  
7.527  
7.267  
7.264  
7.246  
7.237  
7.233  
7.223  
7.218  
7.202  
7.197  
7.181  
7.178  
7.161  
7.158  
6.932  
6.930  
6.912  
6.895  
6.892  
6.885  
6.829  
6.825  
6.820  
6.810  
6.807  
6.724  
6.722  
6.697  
6.687  
6.684  
6.670  
6.668  
6.651  
6.632  
4.930  
4.765  
4.299  
4.286  
4.275  
4.262  
4.079  
4.061  
4.043  
3.330  
2.954  
2.930  
2.909  
2.888  
2.871  
2.848  
2.835  
2.805  
2.789  
2.696  
2.506  
2.501  
2.497

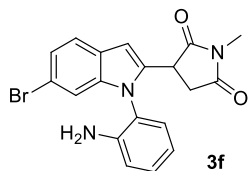

$^1\text{H NMR}$  (400 MHz, DMSO)

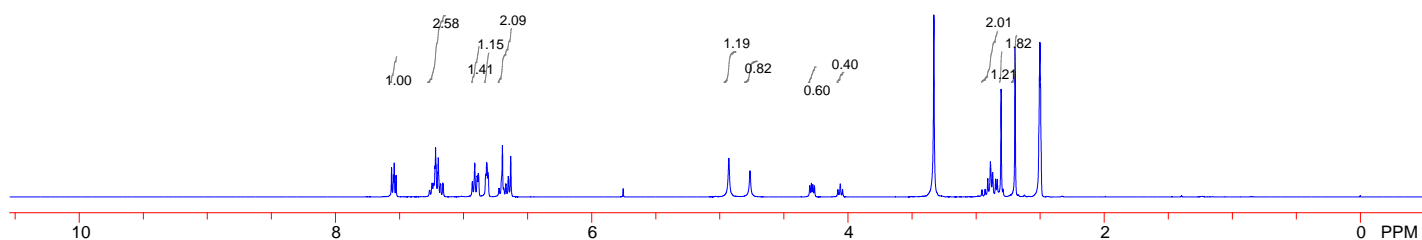

177.341  
176.634  
176.371  
176.034  
139.159  
139.031  
138.370  
146.271  
138.256  
130.829  
130.639  
130.497  
130.378  
127.085  
126.940  
123.357  
122.547  
120.035  
119.909  
116.998  
116.876  
116.649  
116.366  
115.037  
114.807  
113.145  
112.913  
103.790  
101.247  
40.639  
40.437  
40.228  
40.020  
39.812  
39.688  
38.686  
38.394  
36.895  
36.501  
34.990  
25.175  
25.028

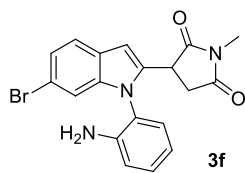

$^{13}\text{C}\{^1\text{H}\}$  (100 MHz, DMSO)

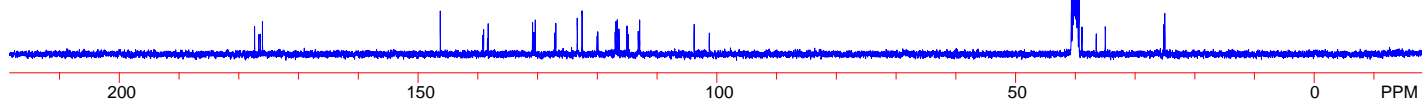

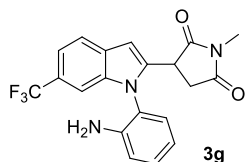

$^1\text{H NMR}$  (600 MHz,  $\text{CDCl}_3$ )

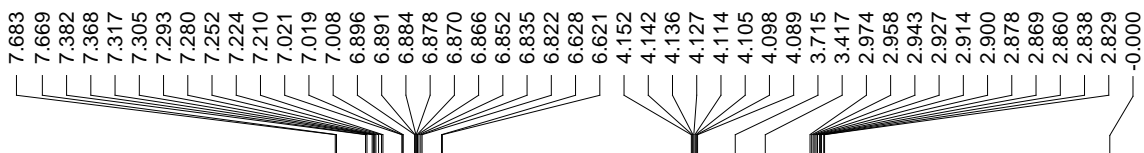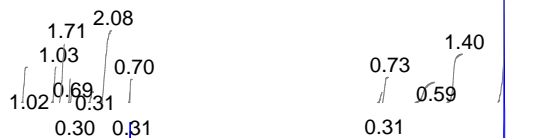

12 10 8 6 4 2 0 PPM

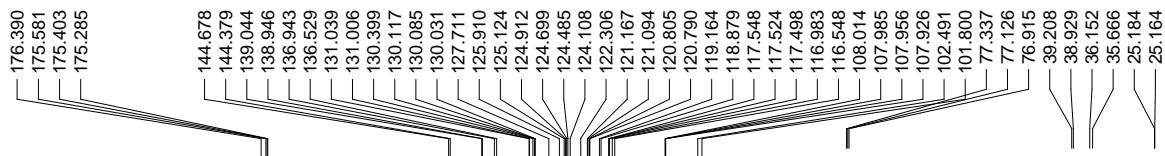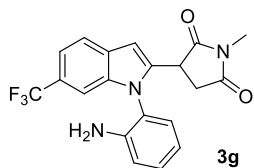

$^{13}\text{C}\{^1\text{H}\}$  (150 MHz,  $\text{CDCl}_3$ )

200 150 100 50 0 PPM

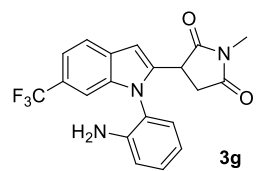

$^{19}\text{F}$  NMR (565 MHz,  $\text{CDCl}_3$ )

60.513  
60.525

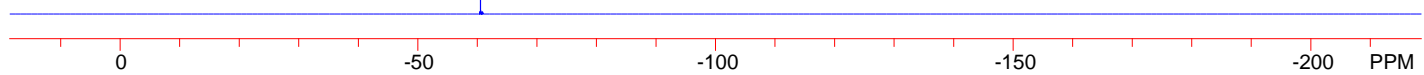

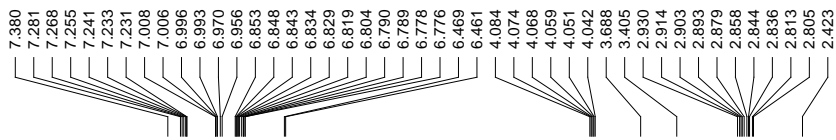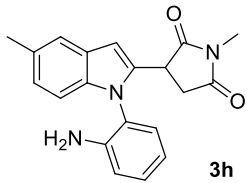

$^1\text{H NMR}$  (600 MHz,  $\text{CDCl}_3$ )

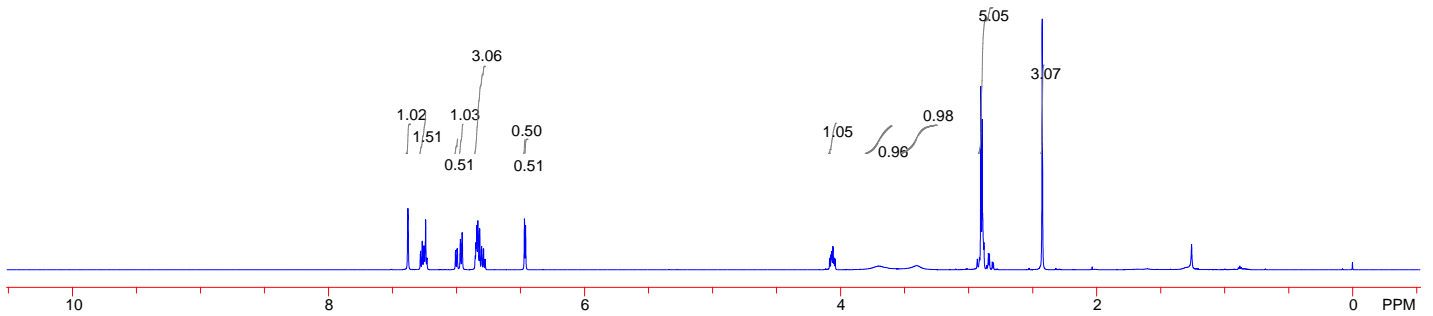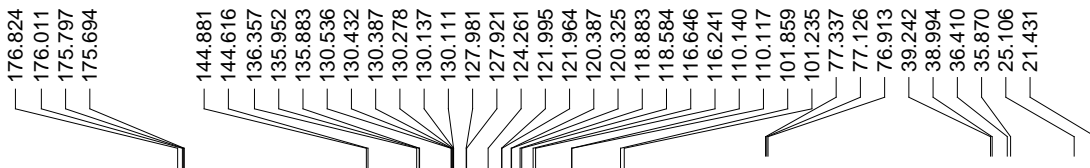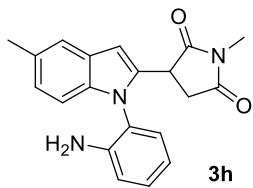

$^{13}\text{C}\{^1\text{H}\}$  (150 MHz,  $\text{CDCl}_3$ )

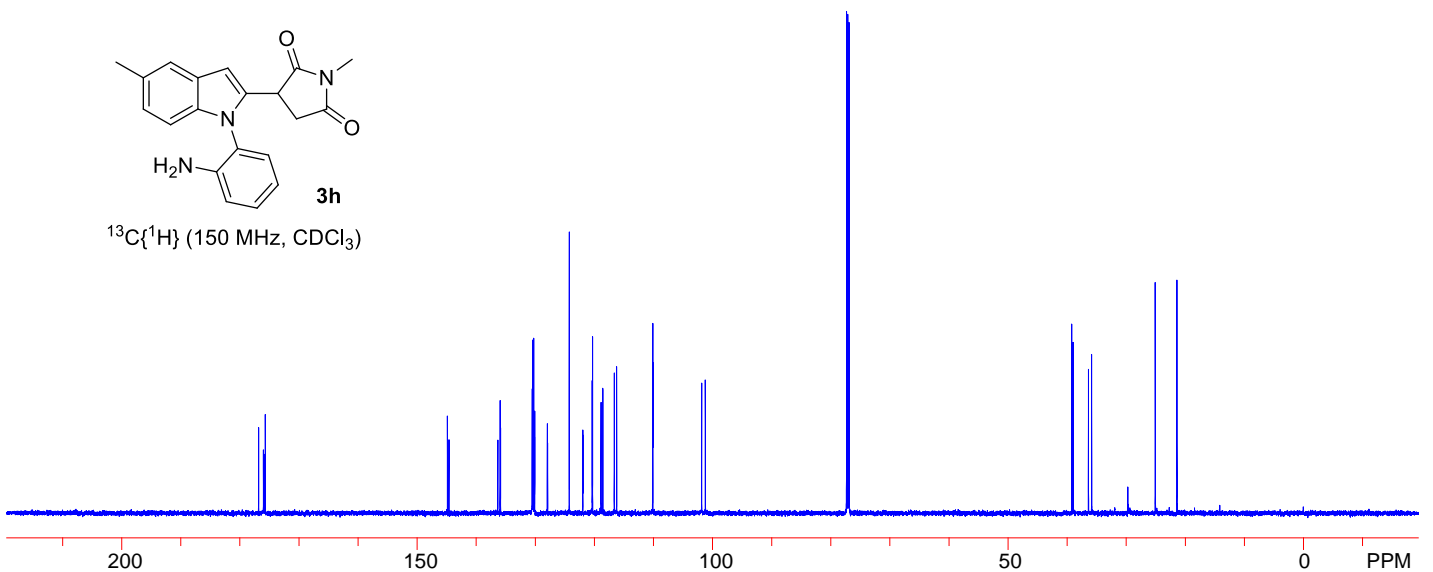

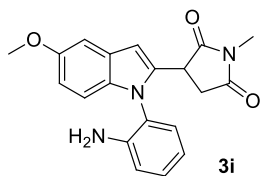

$^1\text{H NMR}$  (600 MHz,  $\text{CDCl}_3$ )

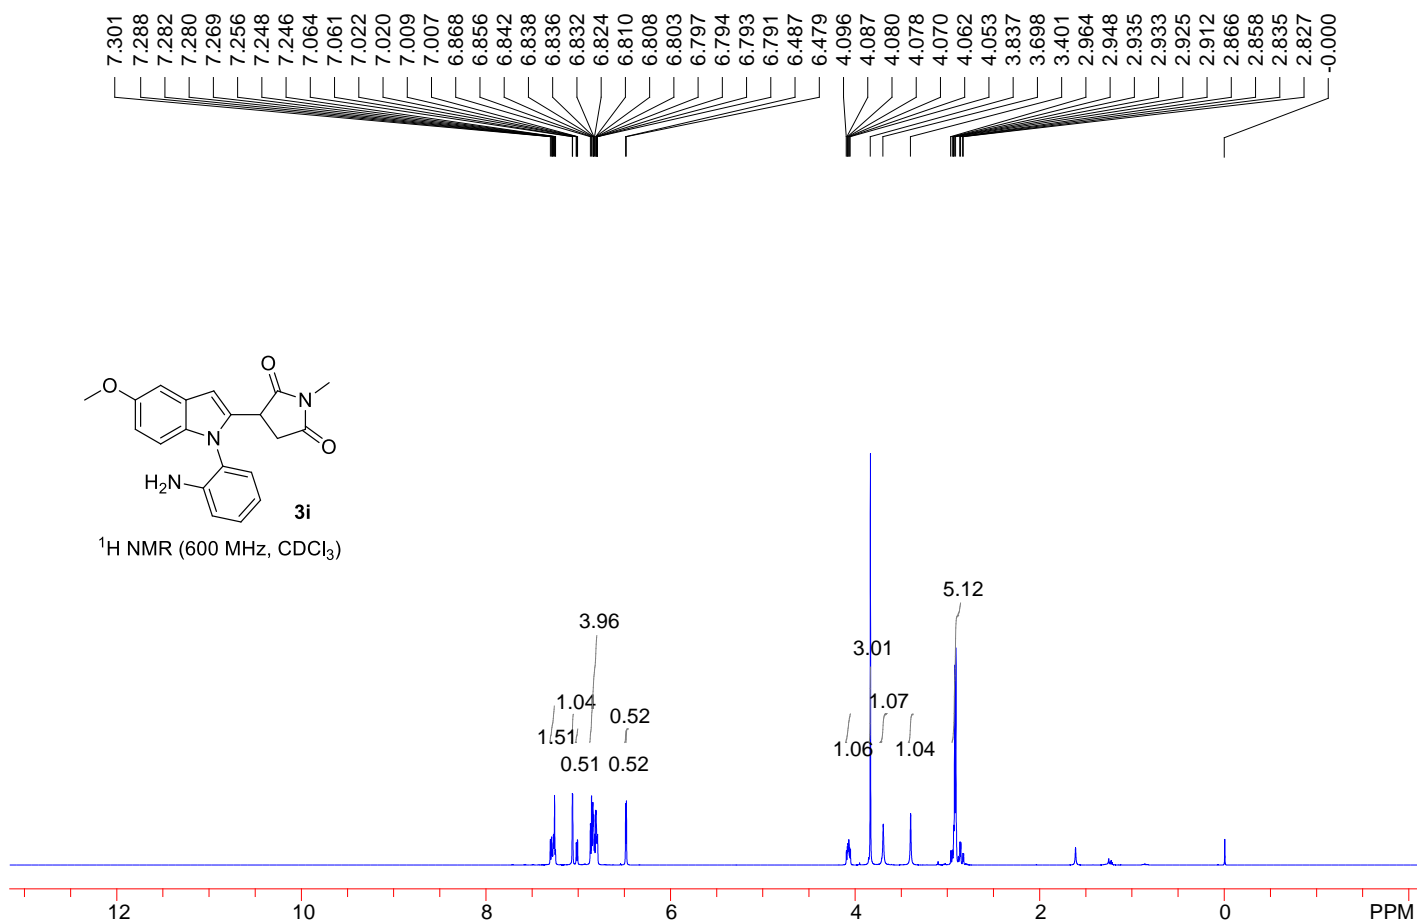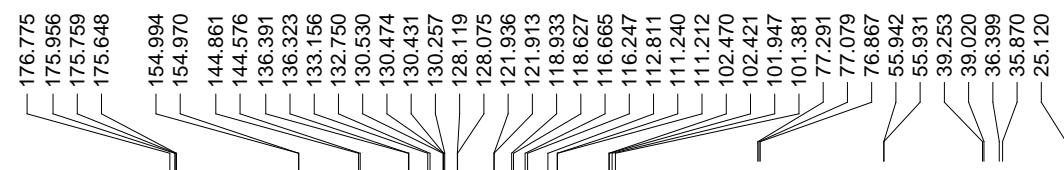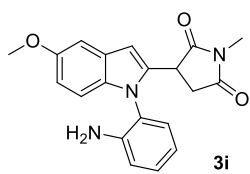

$^{13}\text{C}\{^1\text{H}\}$  (150 MHz,  $\text{CDCl}_3$ )

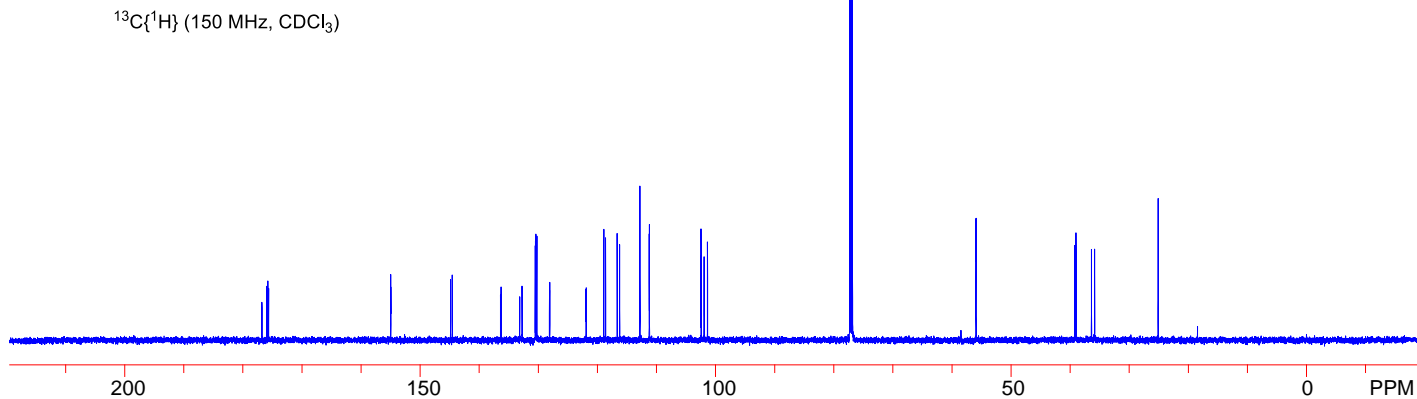



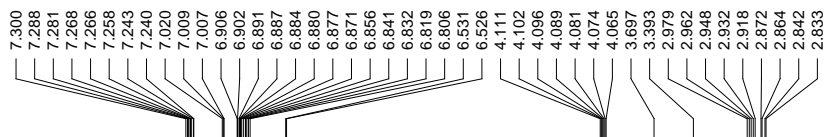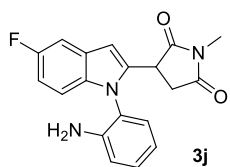

$^1\text{H NMR}$  (600 MHz,  $\text{CDCl}_3$ )

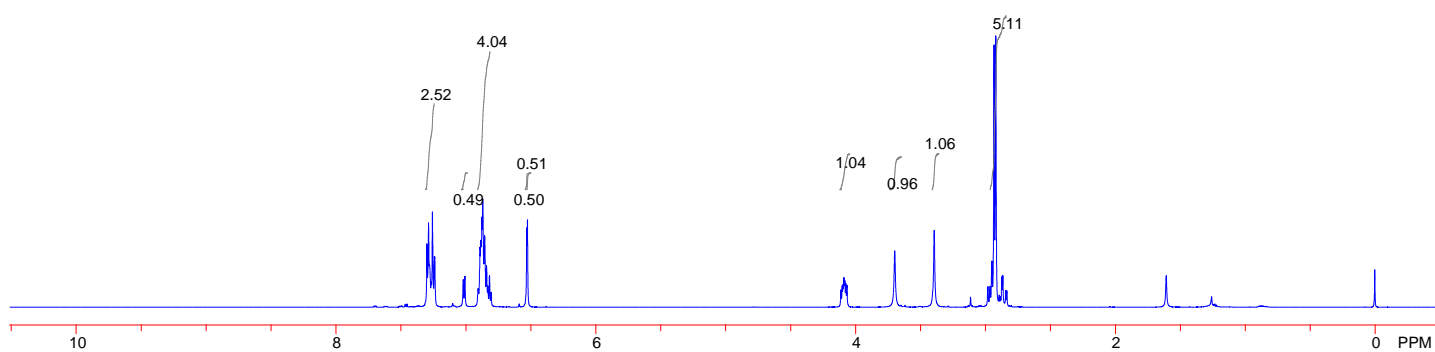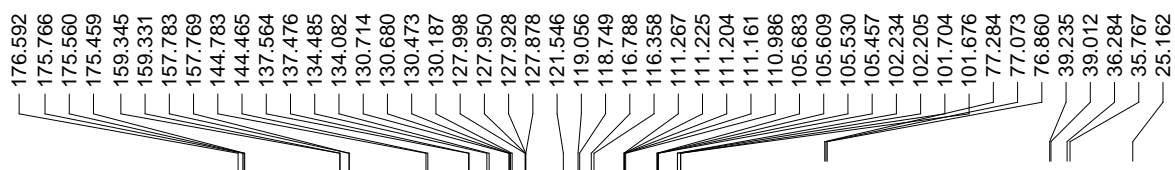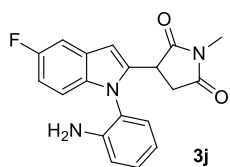

$^{13}\text{C}\{^1\text{H}\}$  (150 MHz,  $\text{CDCl}_3$ )

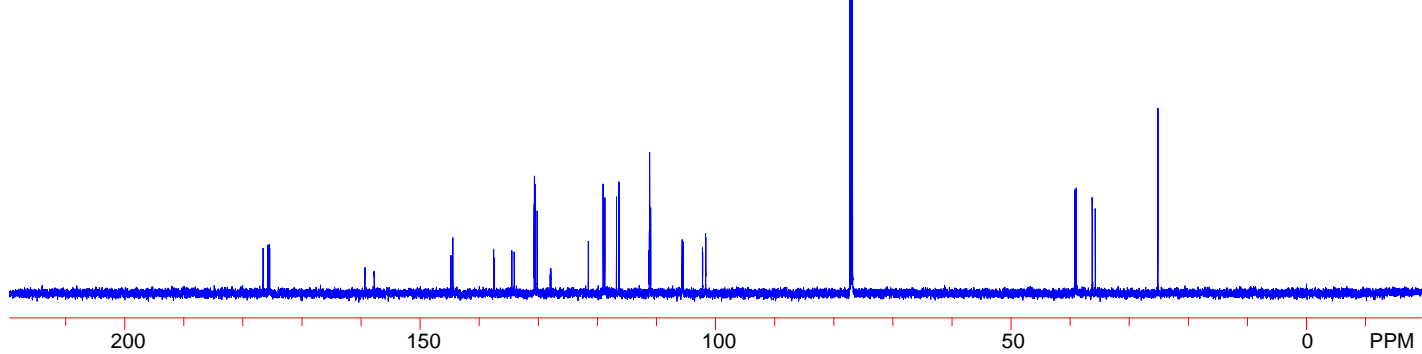

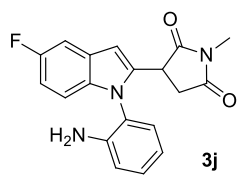

<sup>19</sup>F NMR (565 MHz, CDCl<sub>3</sub>)

123.449  
123.458  
123.468  
123.473  
123.482  
123.488  
123.510  
123.518  
123.526  
123.536  
123.543  
123.550

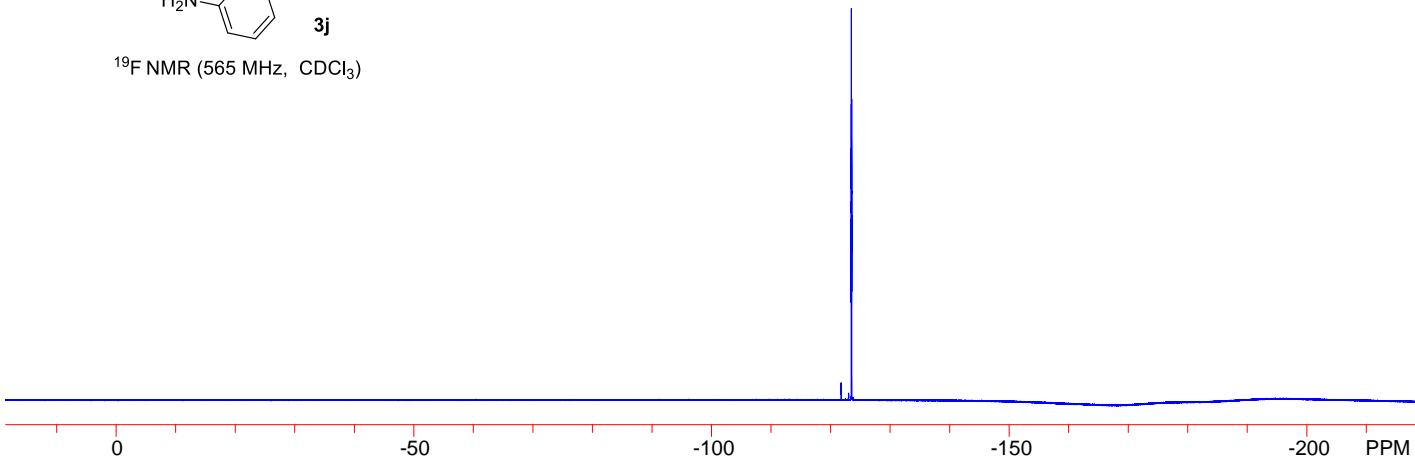

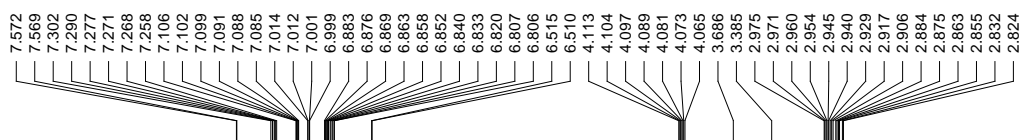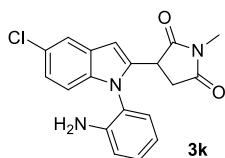

$^1\text{H NMR}$  (600 MHz,  $\text{CDCl}_3$ )

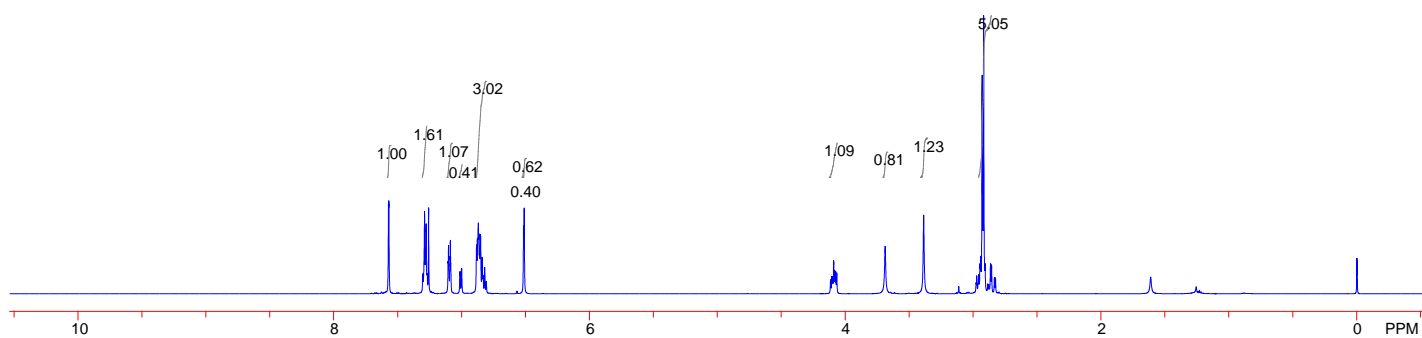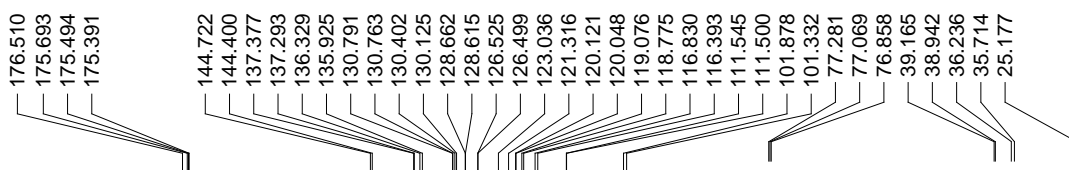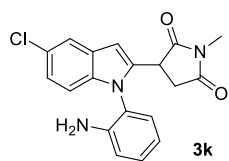

$^{13}\text{C}\{^1\text{H}\}$  (150 MHz,  $\text{CDCl}_3$ )

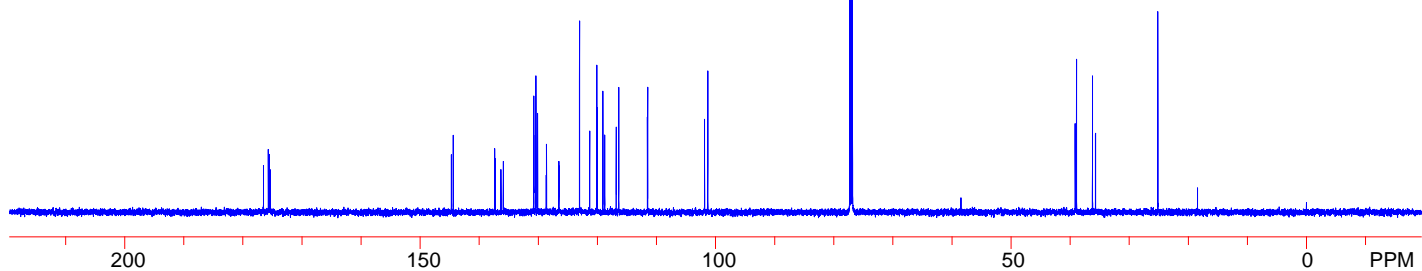

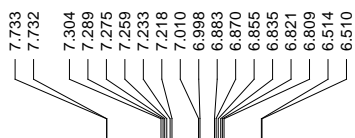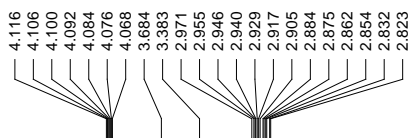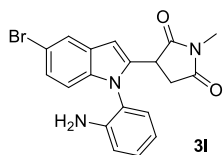

$^1\text{H NMR}$  (600 MHz,  $\text{CDCl}_3$ )

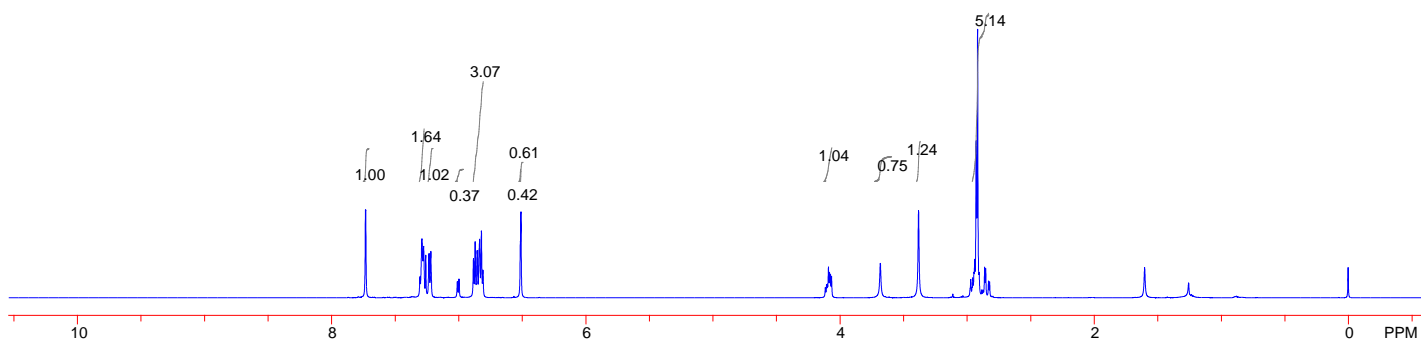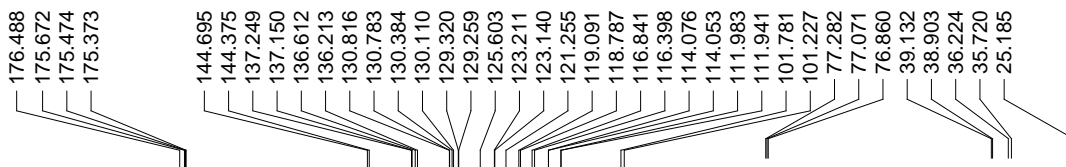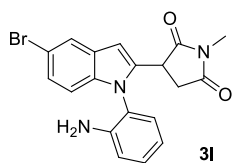

$^{13}\text{C}\{^1\text{H}\}$  (150 MHz,  $\text{CDCl}_3$ )

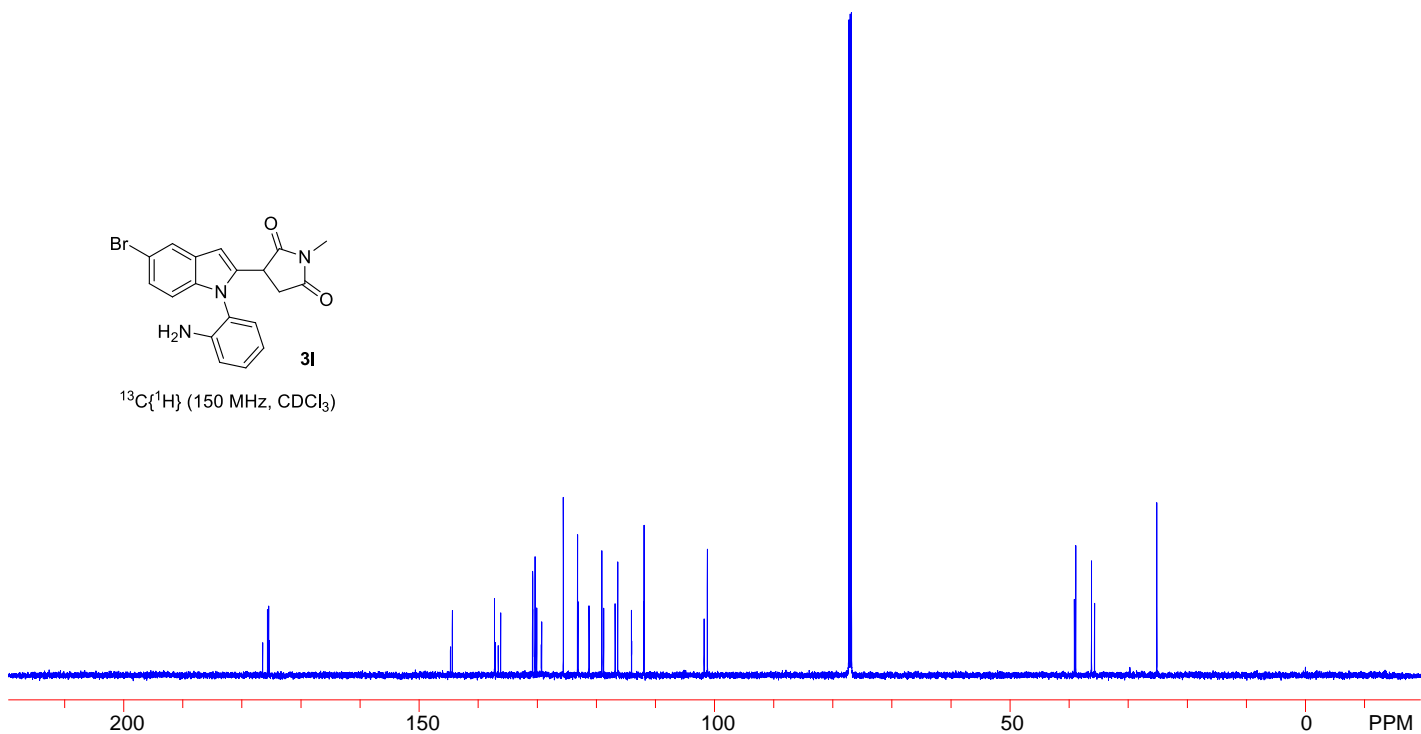

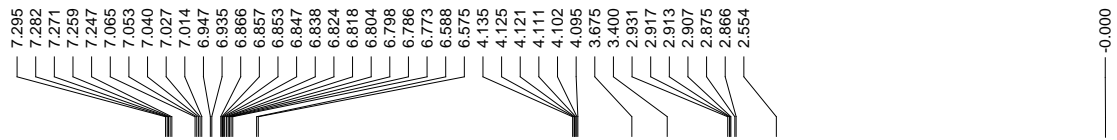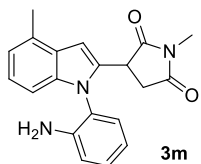

<sup>1</sup>H NMR (600 MHz, CDCl<sub>3</sub>)

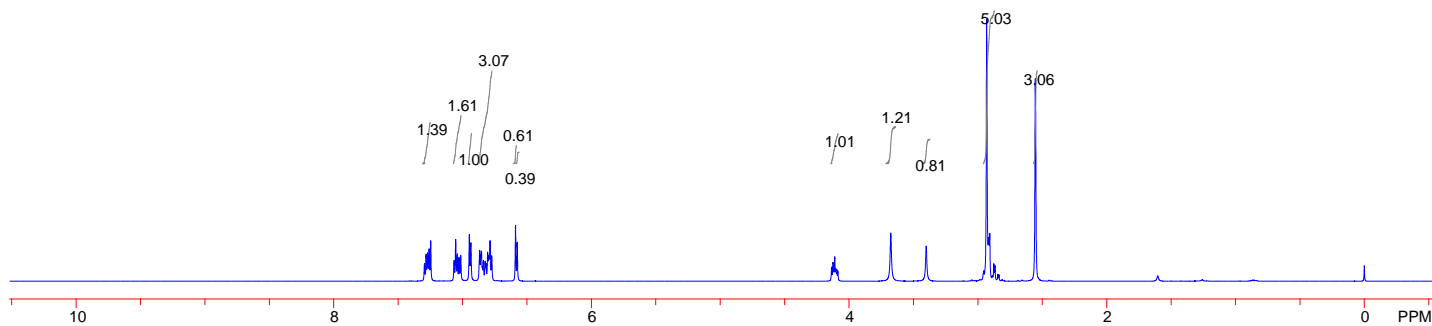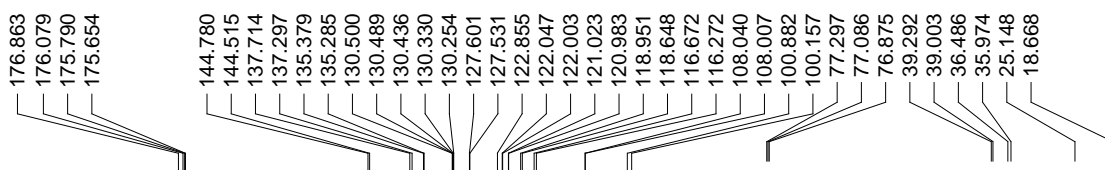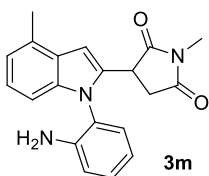

<sup>13</sup>C{<sup>1</sup>H} (150 MHz, CDCl<sub>3</sub>)

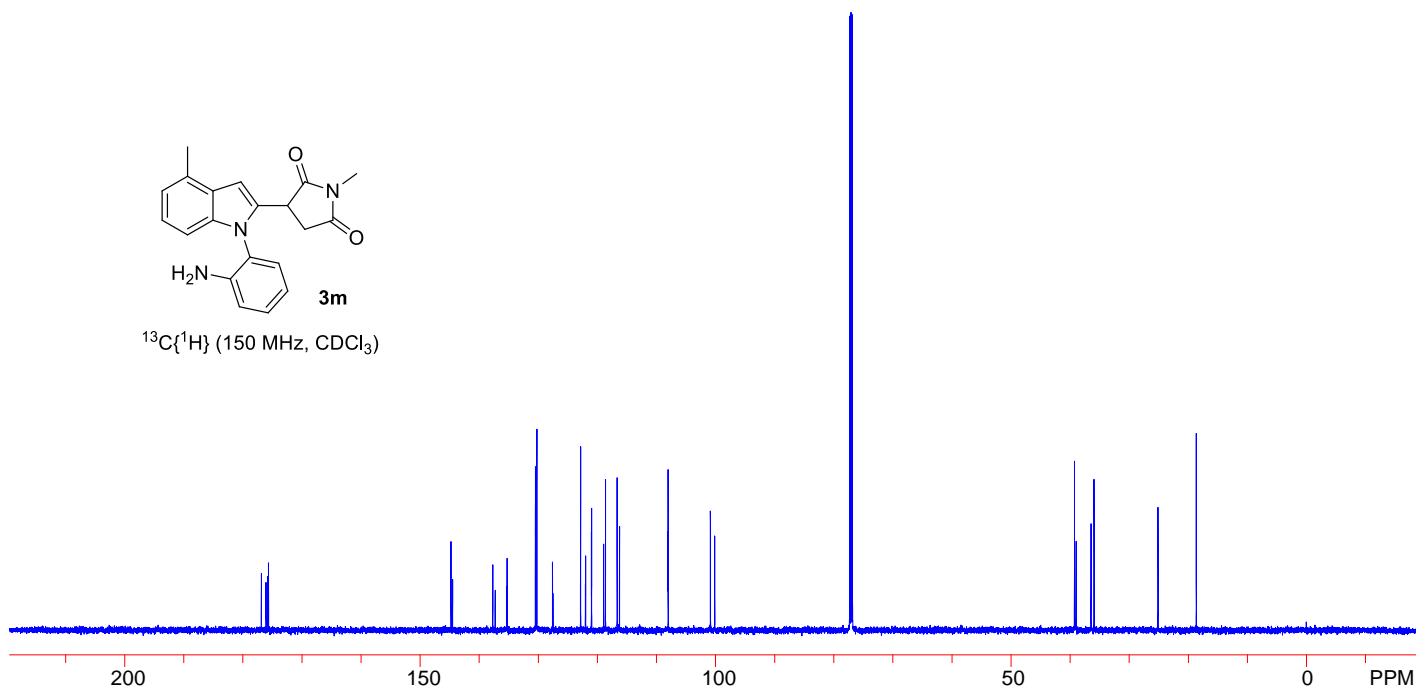

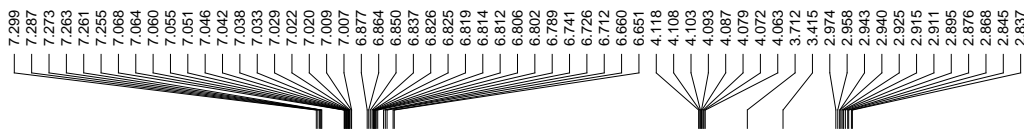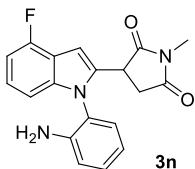

$^1\text{H NMR}$  (600 MHz,  $\text{CDCl}_3$ )

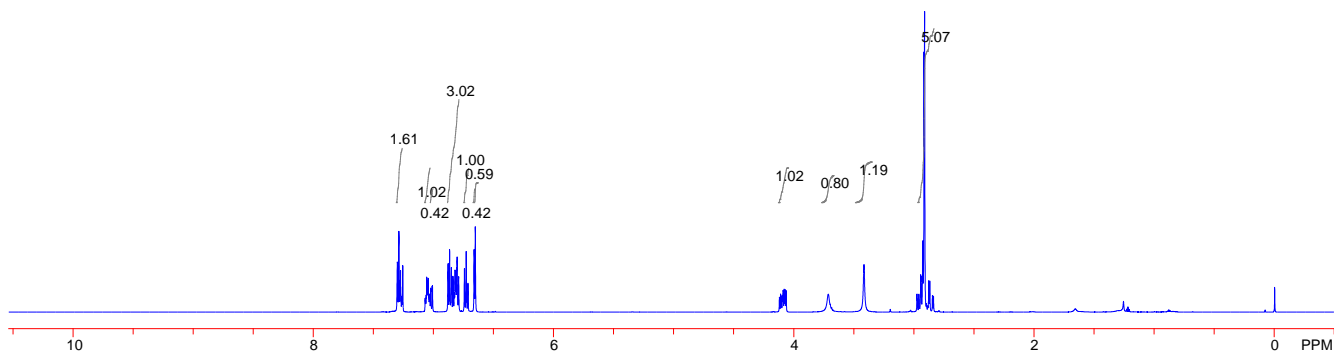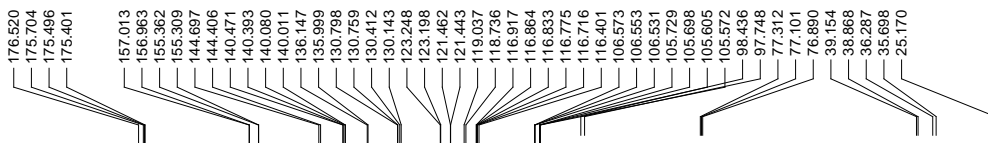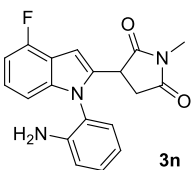

$^{13}\text{C}\{^1\text{H}\}$  (150 MHz,  $\text{CDCl}_3$ )

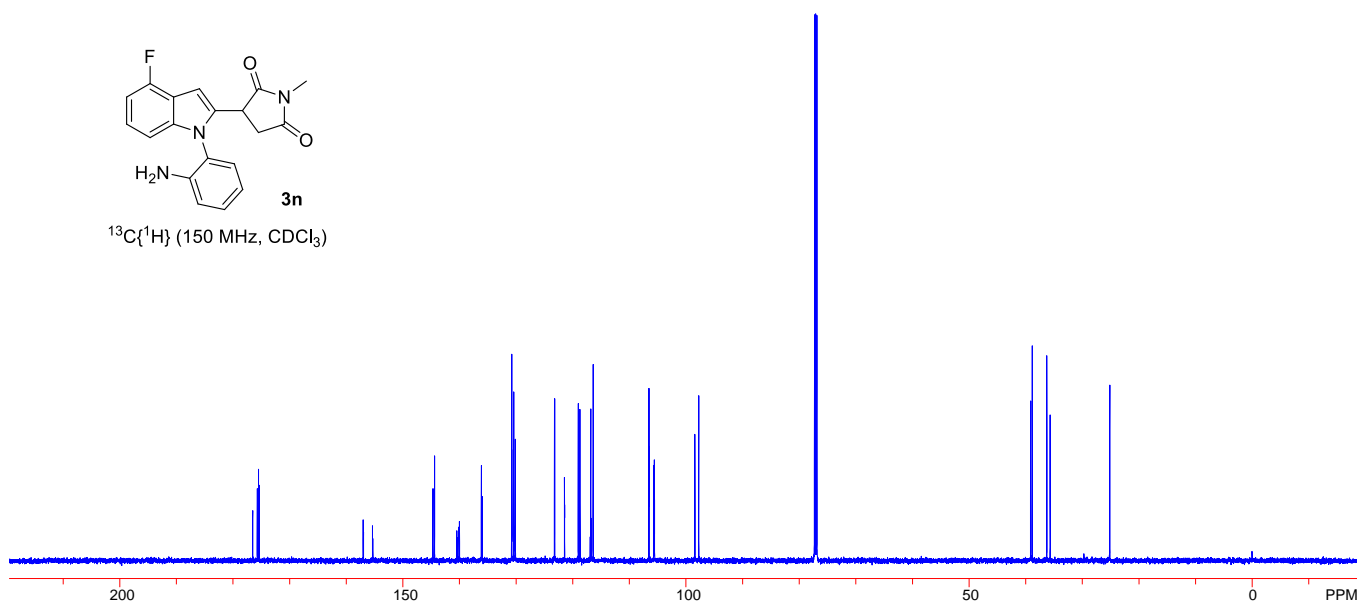

122.106  
122.116  
122.124  
122.135  
122.150  
122.159  
122.167  
122.179

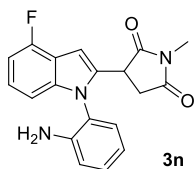

<sup>19</sup>F NMR (565 MHz, CDCl<sub>3</sub>)

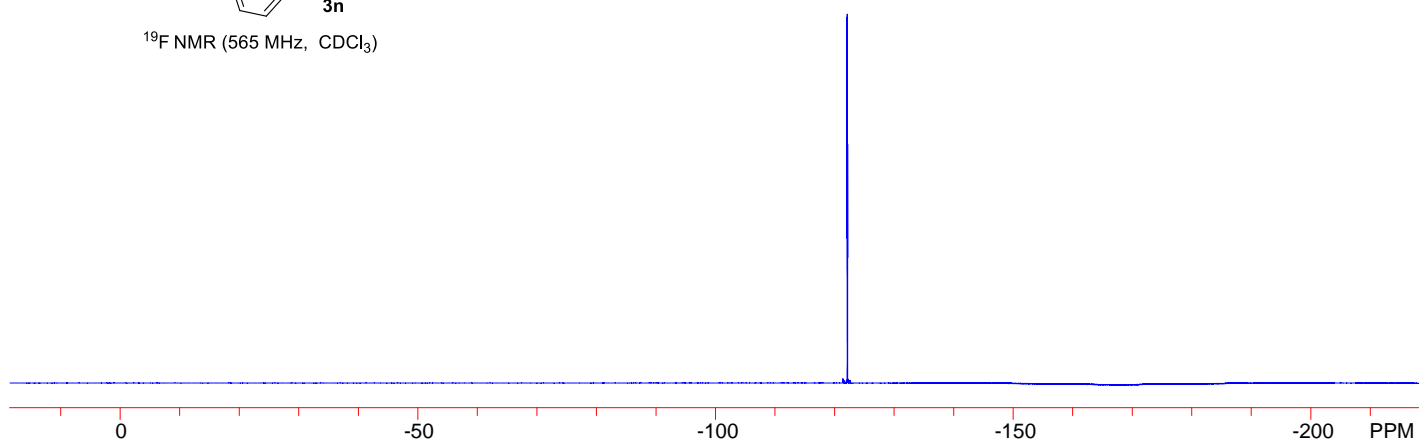

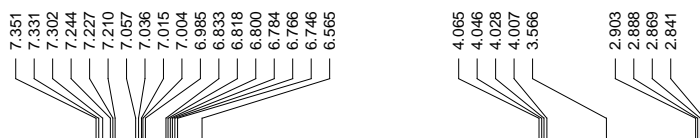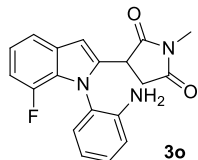

$^1\text{H NMR}$  (400 MHz,  $\text{CDCl}_3$ )

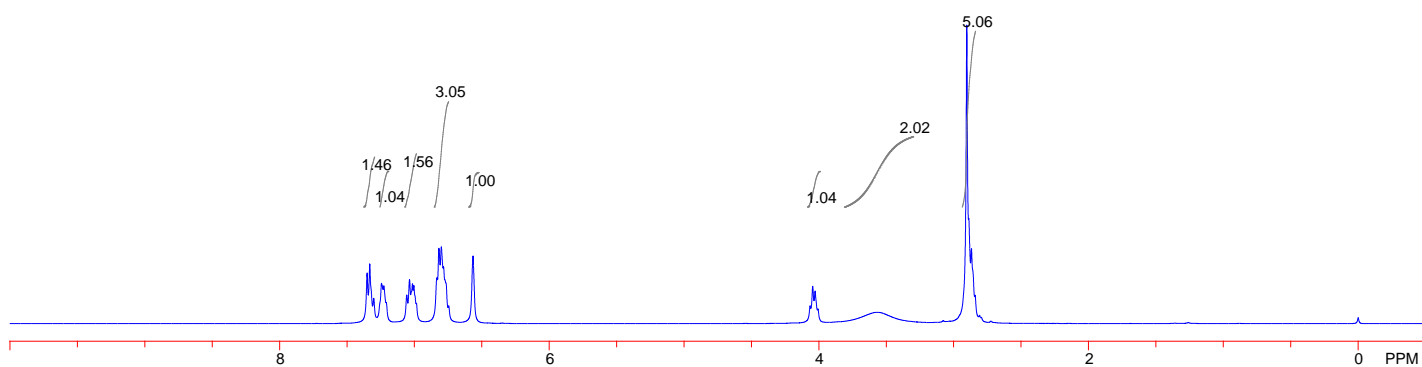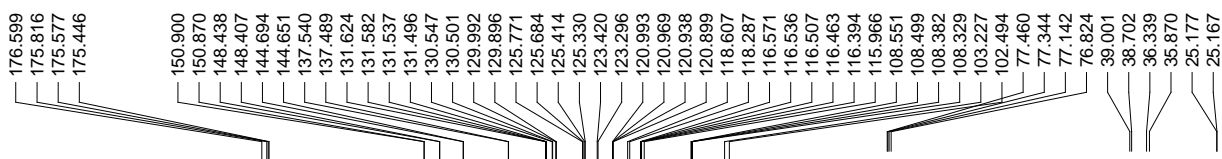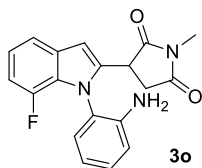

$^{13}\text{C}\{^1\text{H}\}$  (100 MHz,  $\text{CDCl}_3$ )

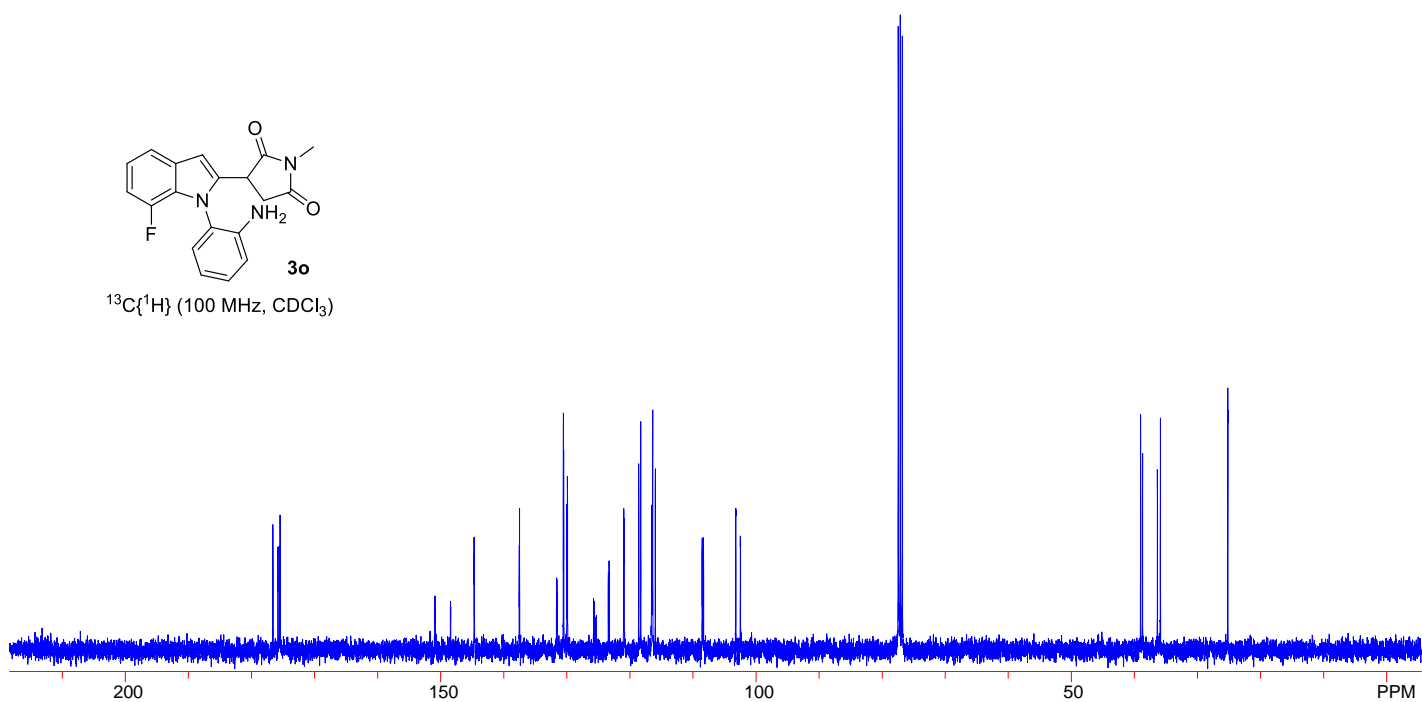



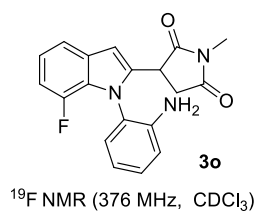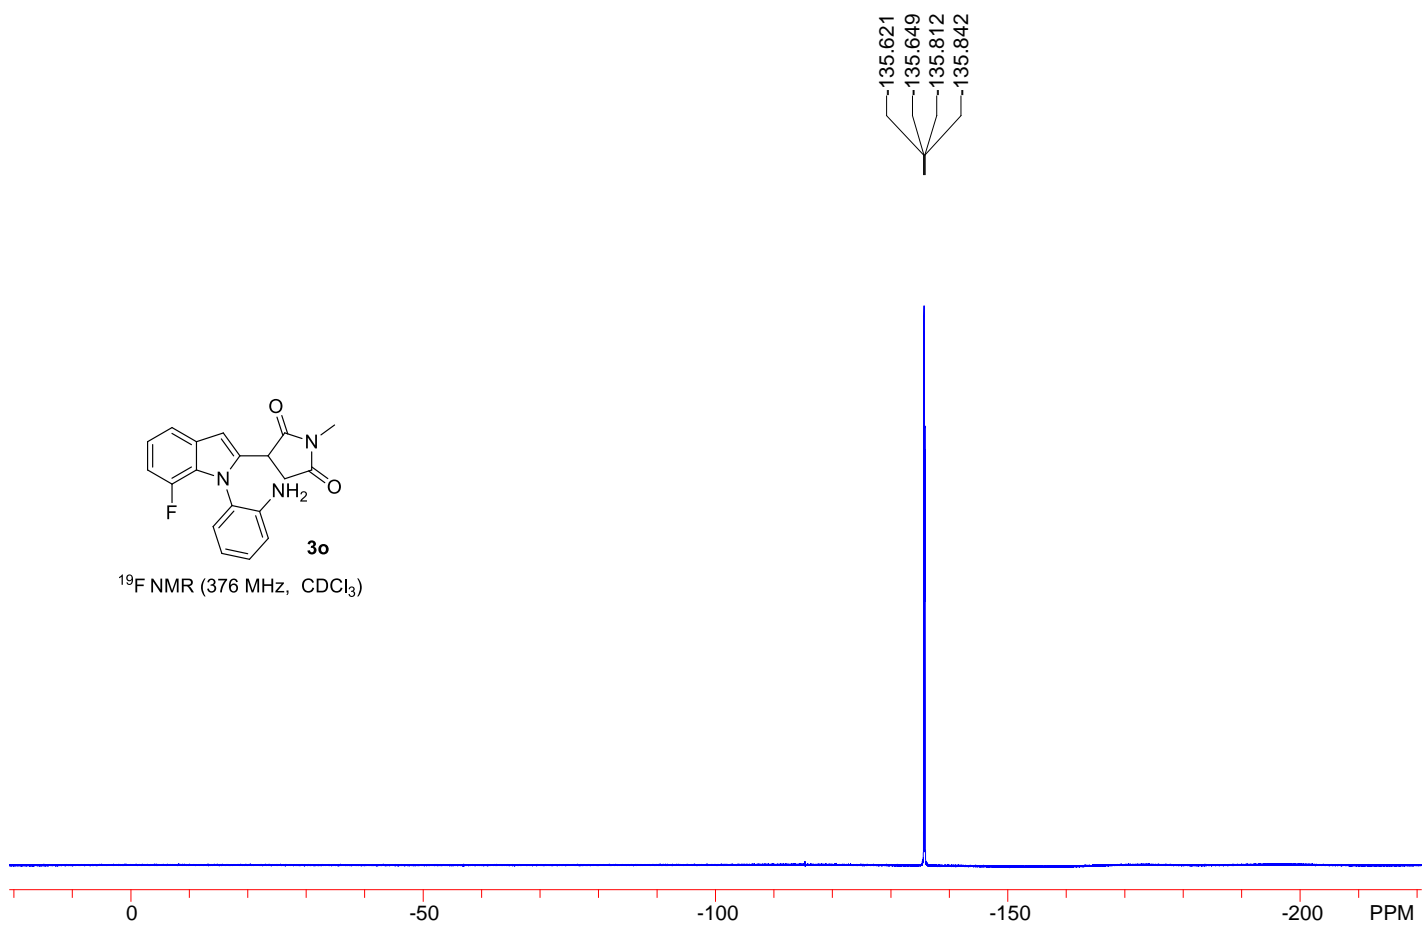

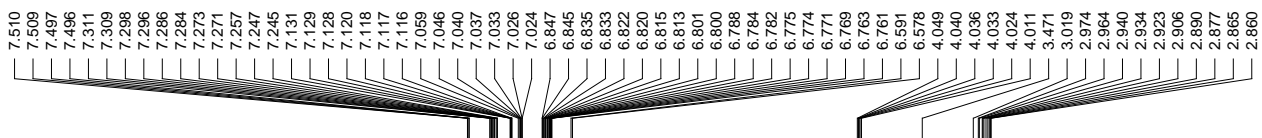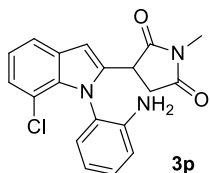

$^1\text{H NMR}$  (600 MHz,  $\text{CDCl}_3$ )

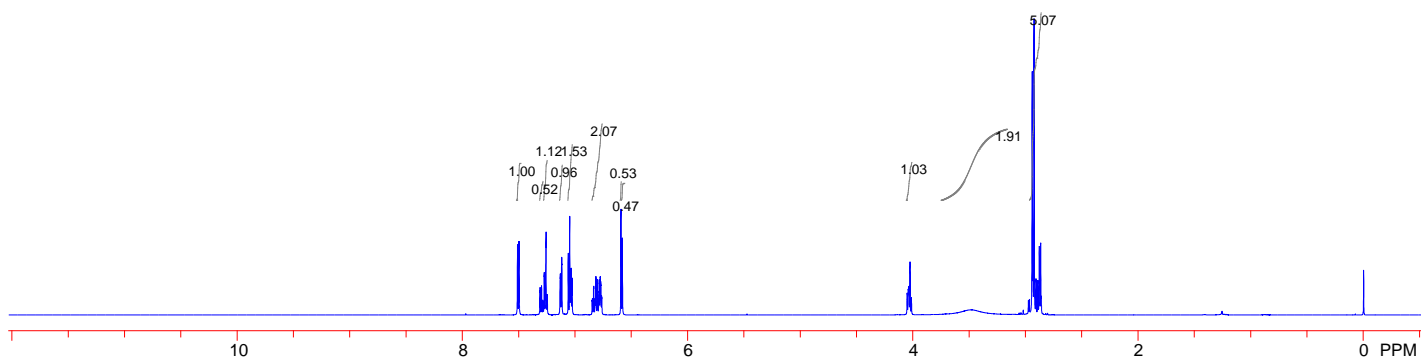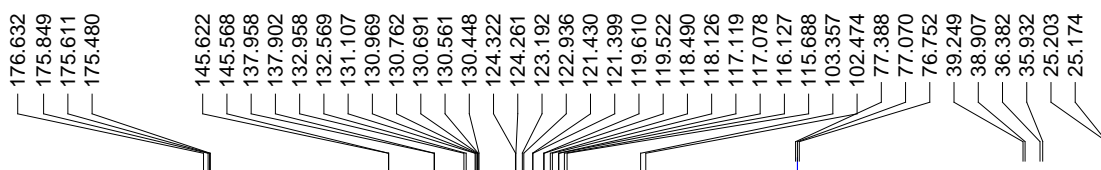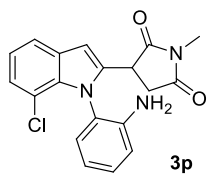

$^{13}\text{C}\{^1\text{H}\}$  (100 MHz,  $\text{CDCl}_3$ )

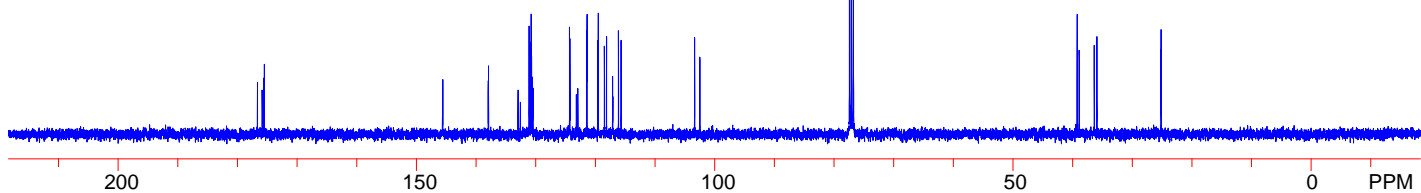

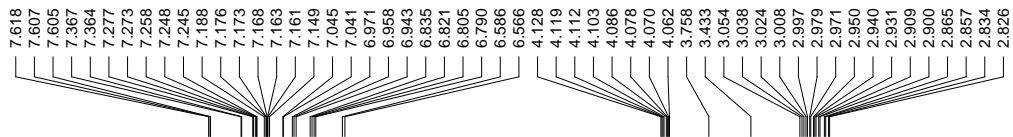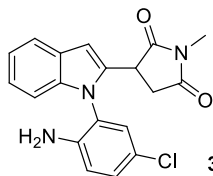

$^1\text{H NMR}$  (600 MHz,  $\text{CDCl}_3$ )

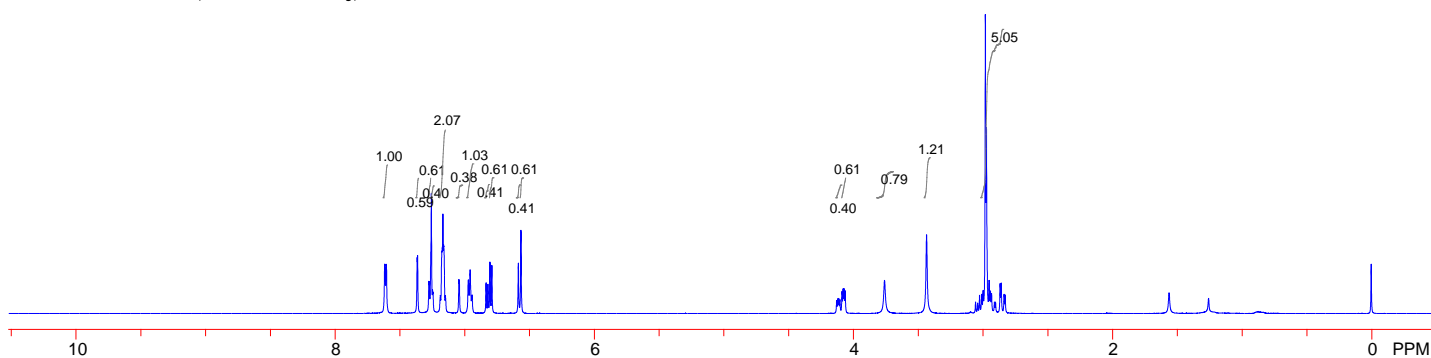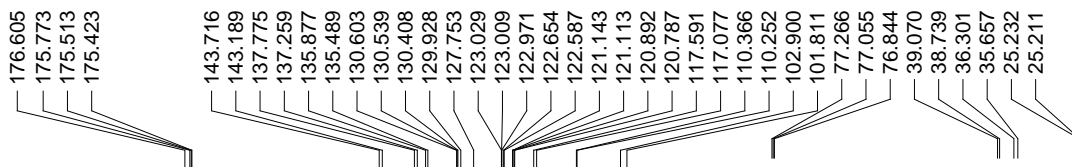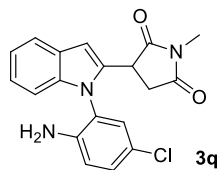

$^{13}\text{C}\{^1\text{H}\}$  (150 MHz,  $\text{CDCl}_3$ )

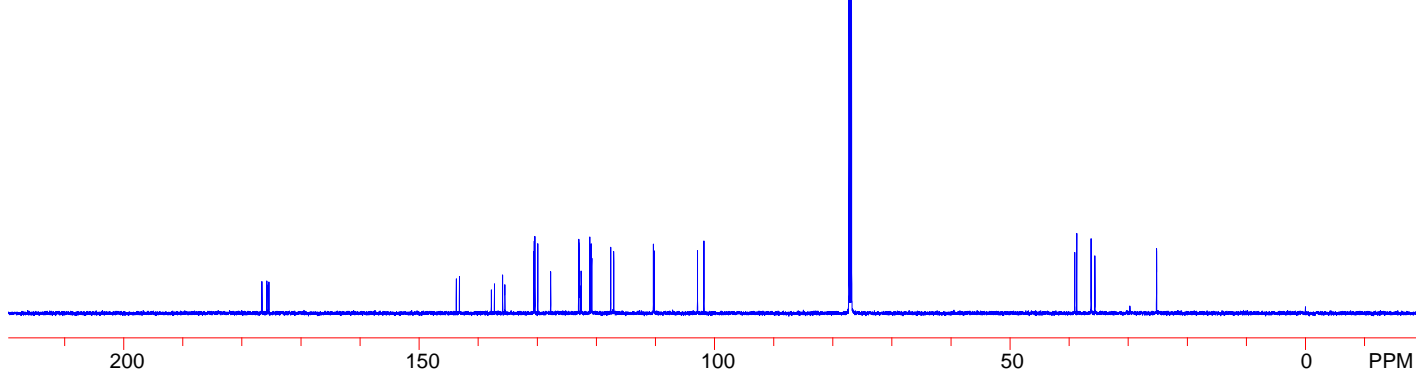

7.616  
7.601  
7.594  
7.490  
7.485  
7.404  
7.399  
7.383  
7.366  
7.360  
7.256  
7.191  
7.173  
7.165  
7.155  
7.138  
6.972  
6.966  
6.951  
6.934  
6.785  
6.763  
6.756  
6.734  
6.578  
6.559  
4.124  
4.110  
4.100  
4.087  
4.074  
4.063  
4.050  
3.780  
3.457  
3.092  
3.066  
3.042  
3.019  
2.995  
2.973  
2.953  
2.942  
2.930  
2.896  
2.883  
2.858  
2.845  
2.812  
2.799  
-0.000

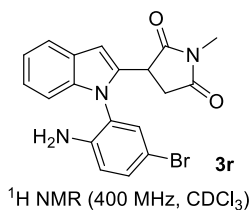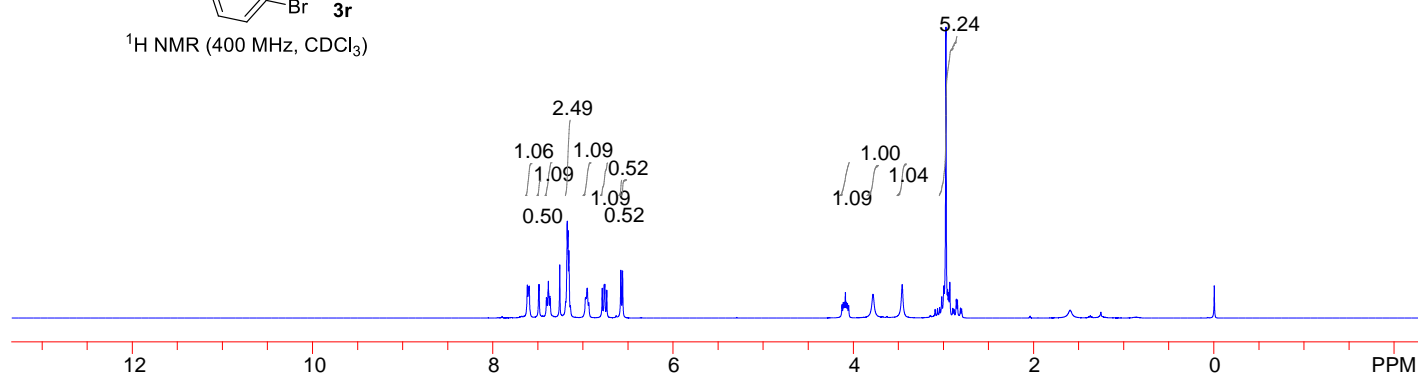

176.610  
175.779  
175.511  
175.429  
144.190  
143.671  
137.794  
137.250  
135.888  
135.485  
133.422  
133.362  
133.198  
132.763  
127.744  
123.014  
122.976  
122.947  
121.152  
121.122  
120.895  
120.793  
117.969  
117.467  
110.379  
110.271  
109.556  
109.184  
102.920  
101.847  
77.275  
77.064  
76.853  
39.082  
38.744  
36.312  
35.655  
25.278  
25.243

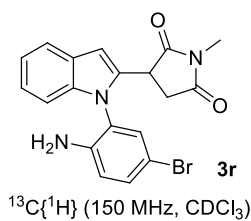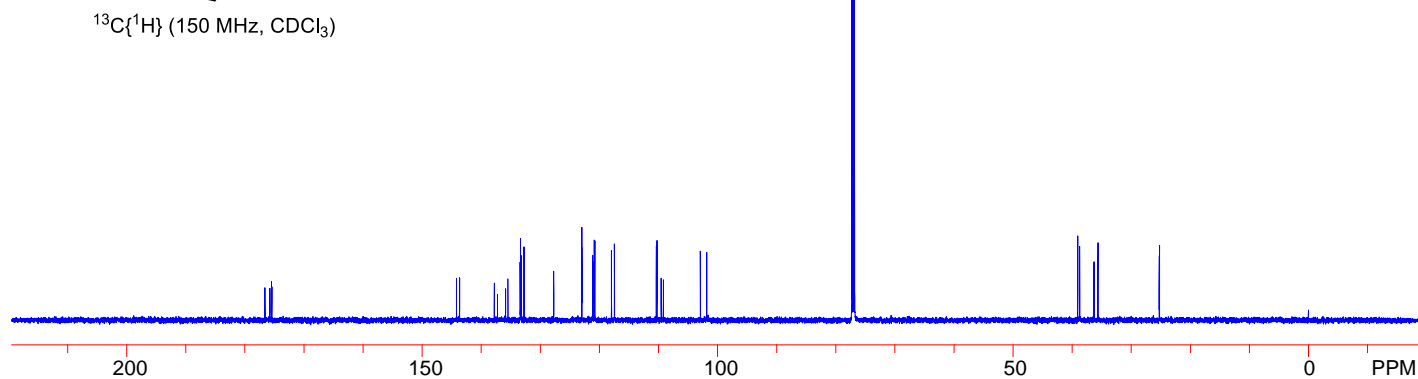

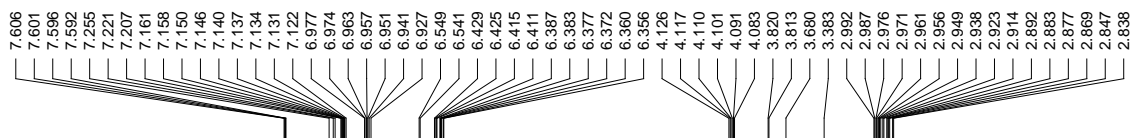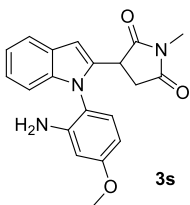

$^1\text{H NMR}$  (600 MHz,  $\text{CDCl}_3$ )

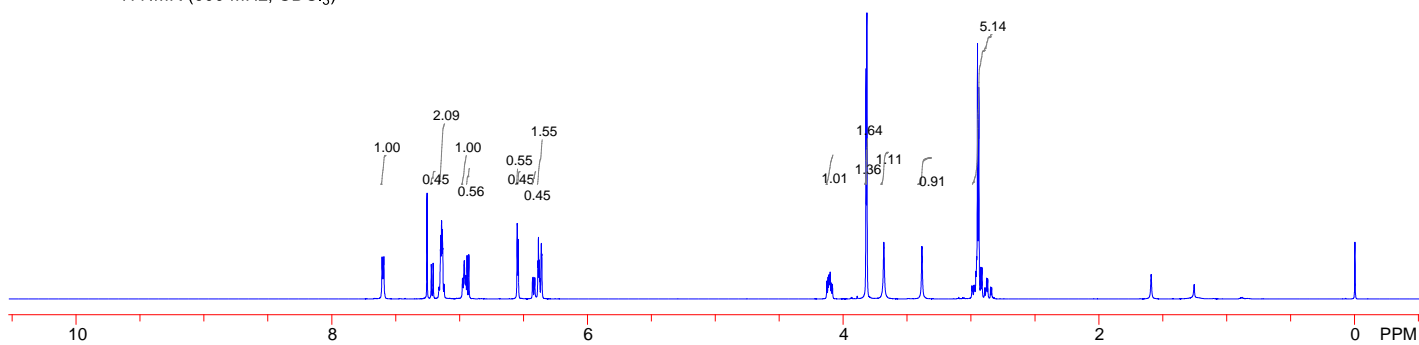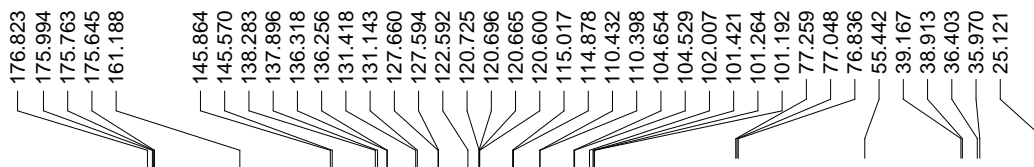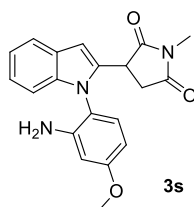

$^{13}\text{C}\{^1\text{H}\}$  (150 MHz,  $\text{CDCl}_3$ )

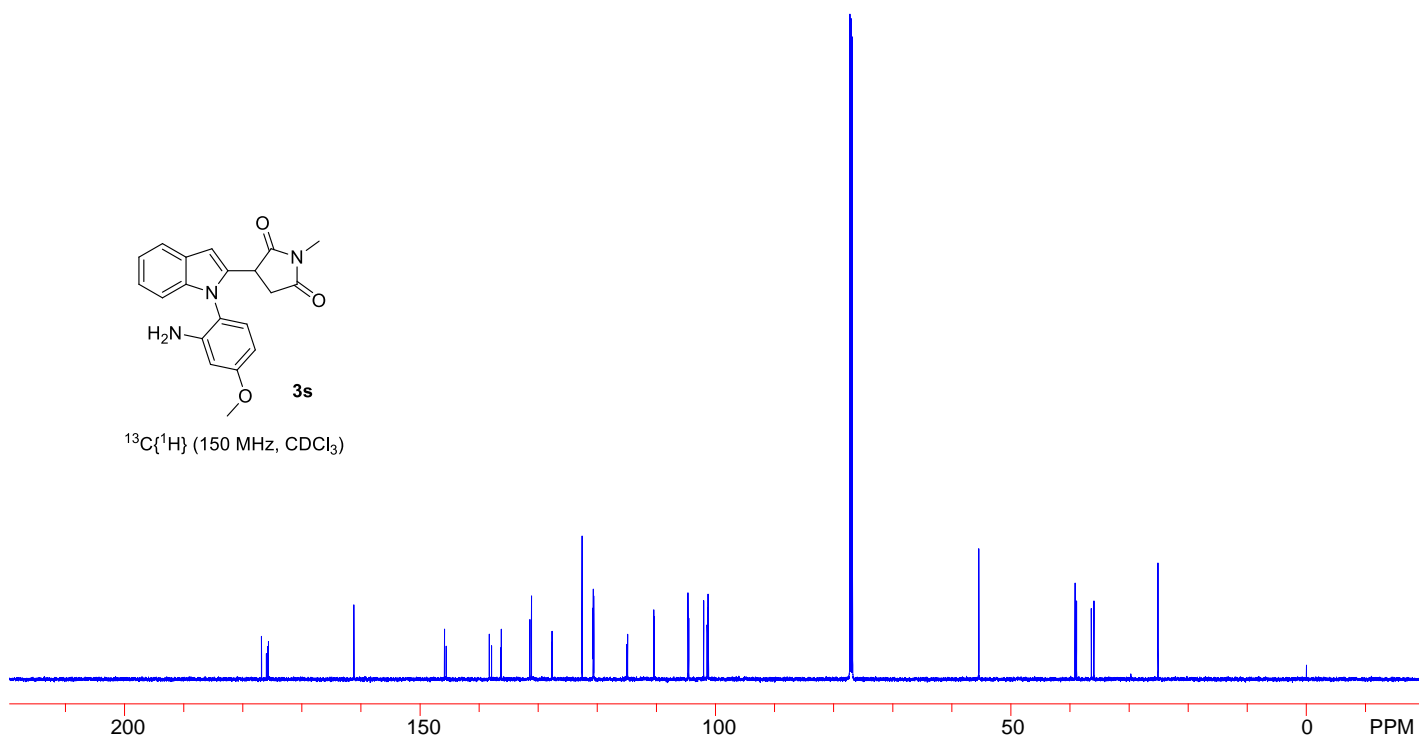

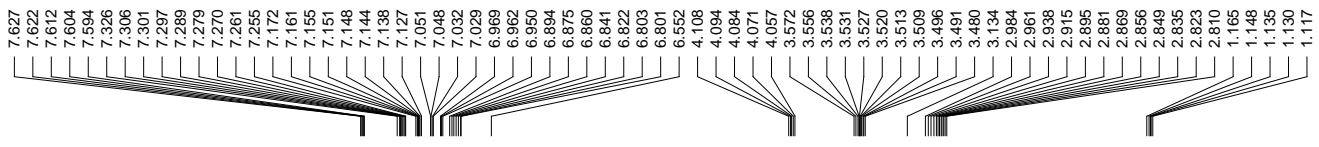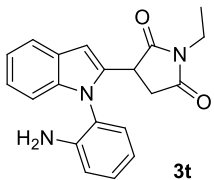

<sup>1</sup>H NMR (400 MHz, CDCl<sub>3</sub>)

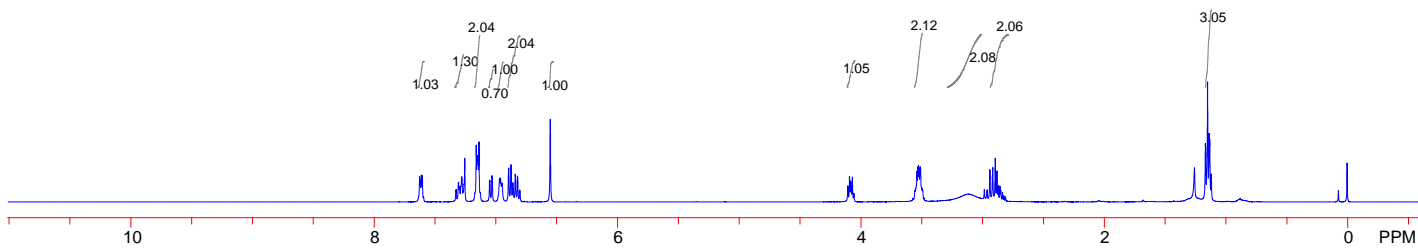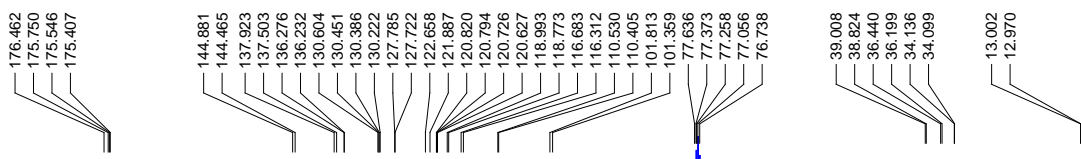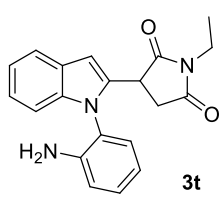

<sup>13</sup>C{<sup>1</sup>H} (100 MHz, CDCl<sub>3</sub>)

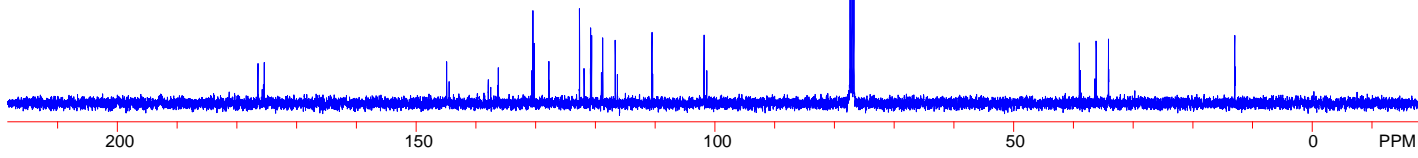

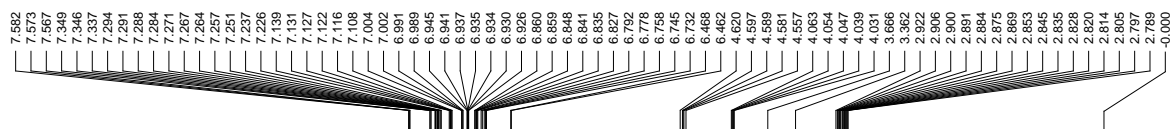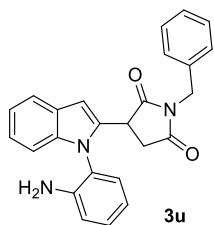

$^1\text{H NMR}$  (600 MHz,  $\text{CDCl}_3$ )

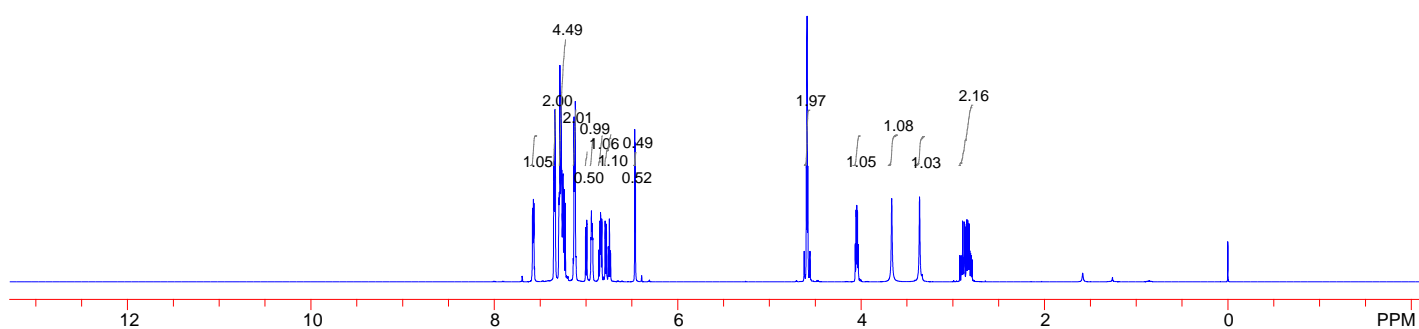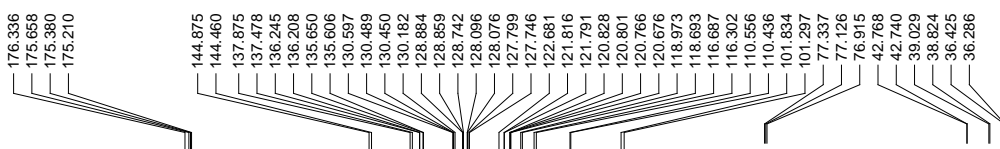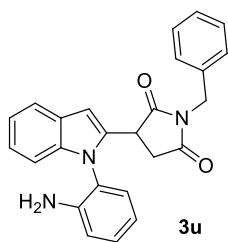

$^{13}\text{C}\{^1\text{H}\}$  (150 MHz,  $\text{CDCl}_3$ )

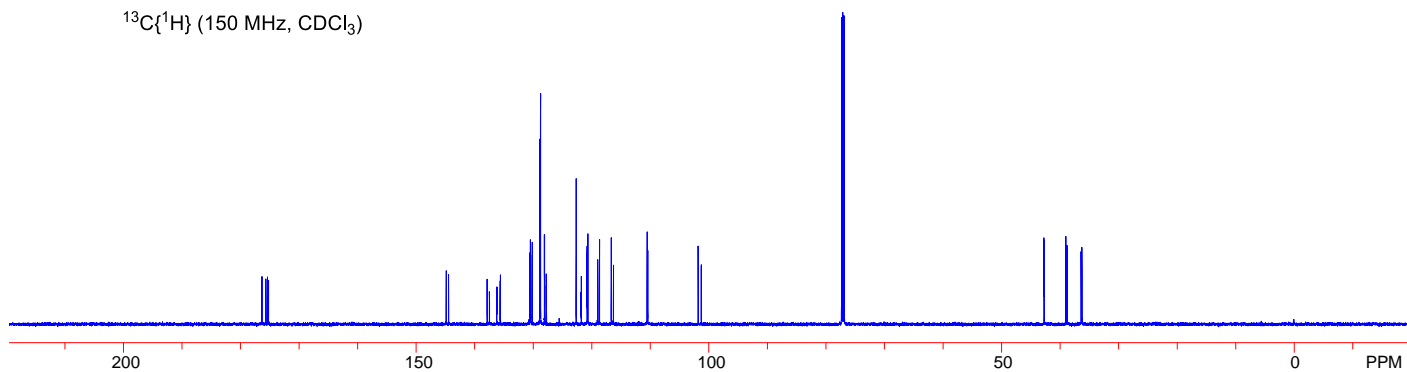

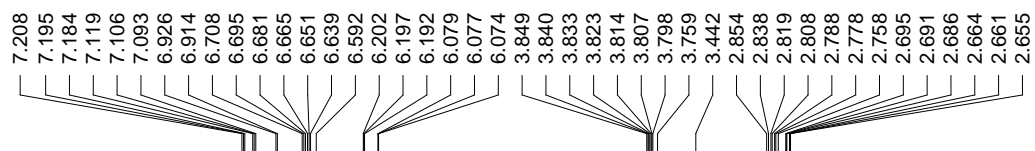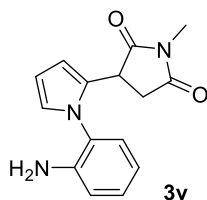

$^1\text{H}$  NMR (600 MHz,  $\text{CDCl}_3$ )

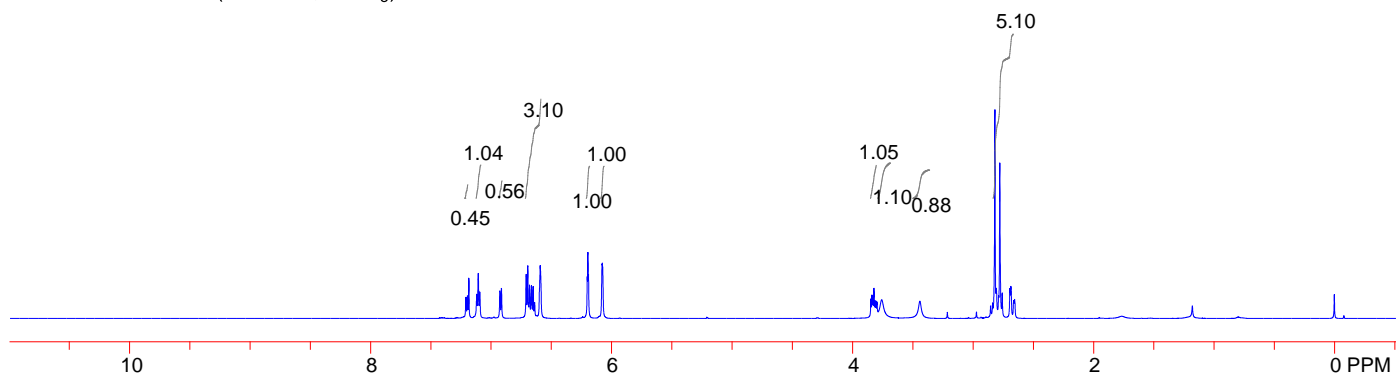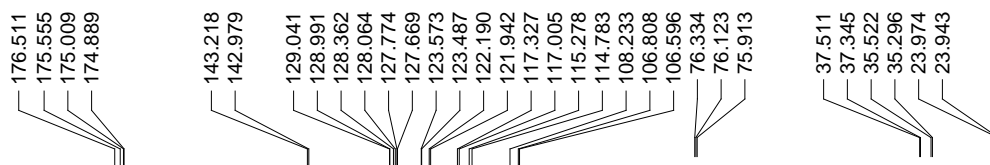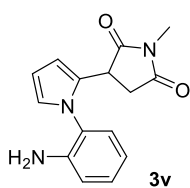

$^{13}\text{C}$  NMR (150 MHz,  $\text{CDCl}_3$ )

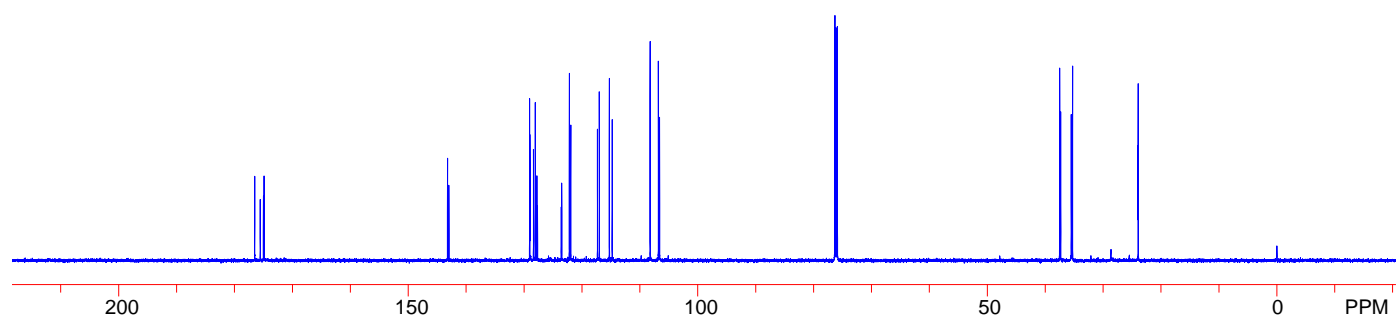



## VI. NMR spectra of 4a-4y

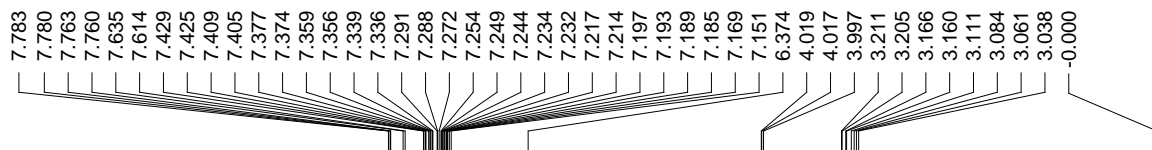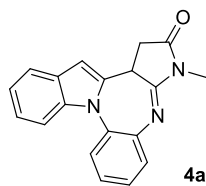

$^1\text{H}$  NMR (400 MHz,  $\text{CDCl}_3$ )

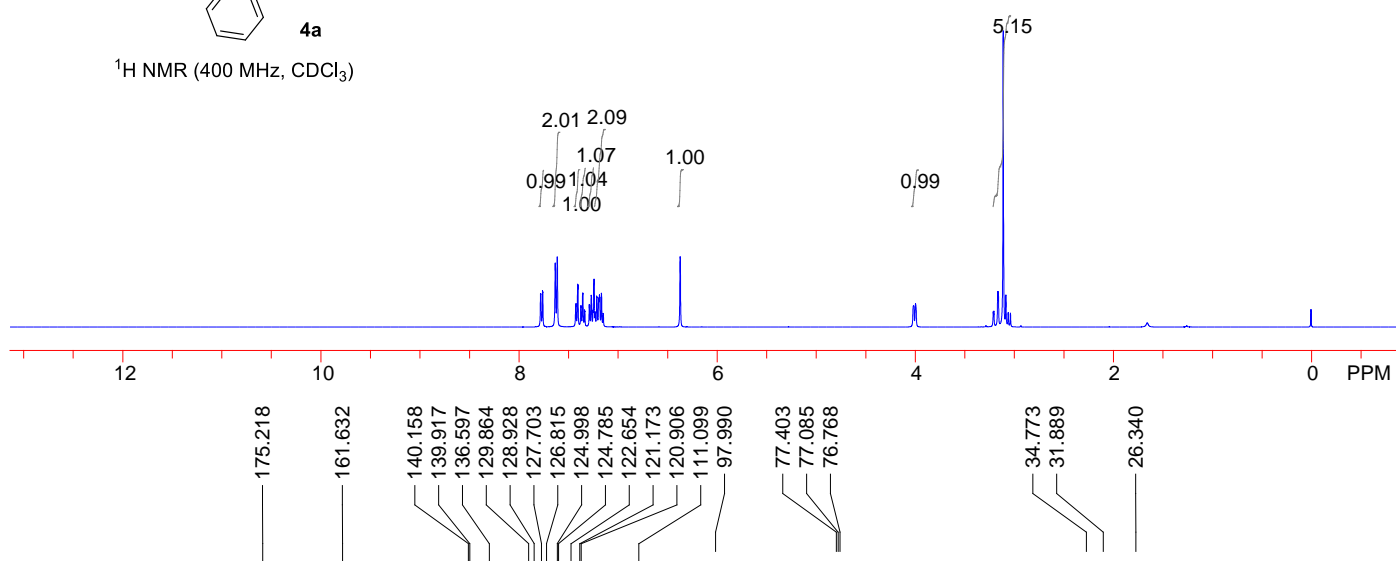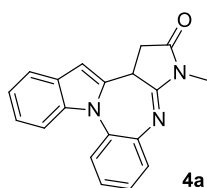

$^{13}\text{C}\{^1\text{H}\}$  (100 MHz,  $\text{CDCl}_3$ )

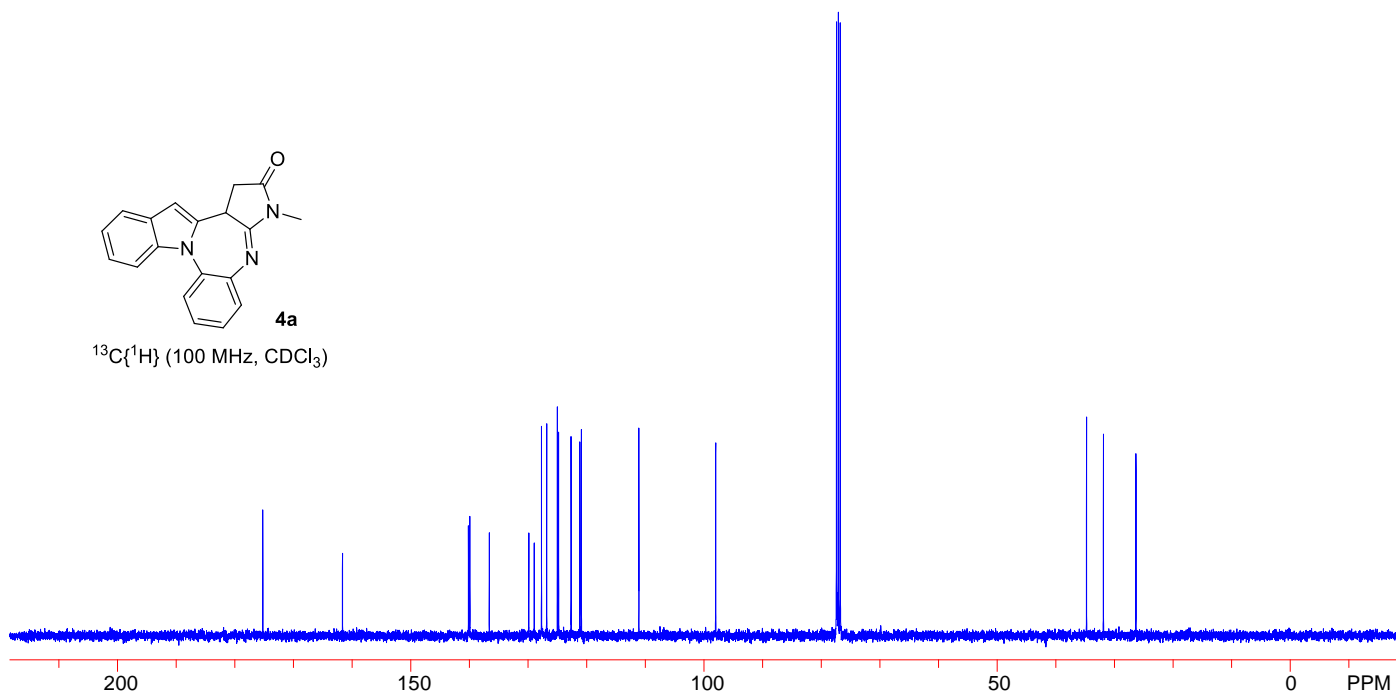

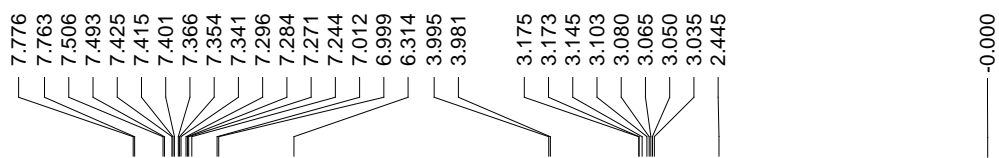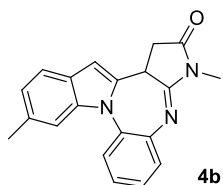

$^1\text{H NMR}$  (600 MHz,  $\text{CDCl}_3$ )

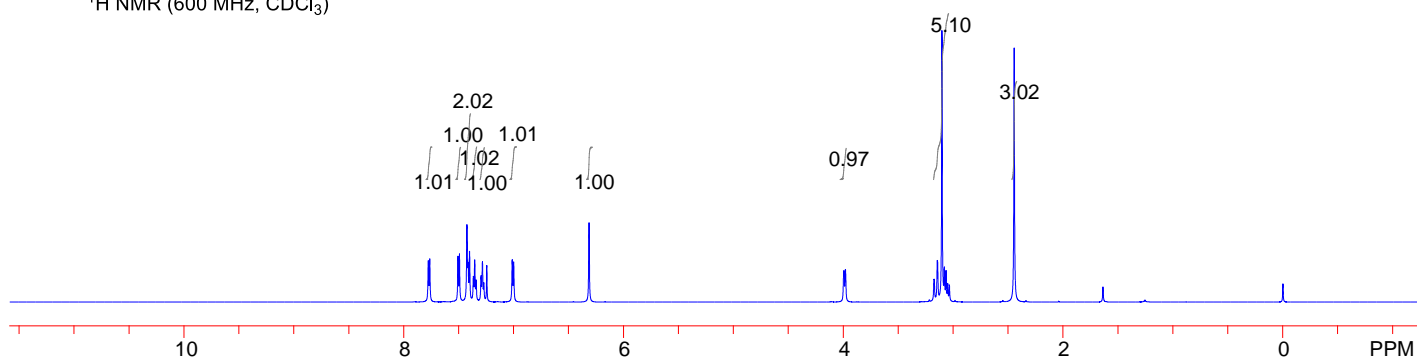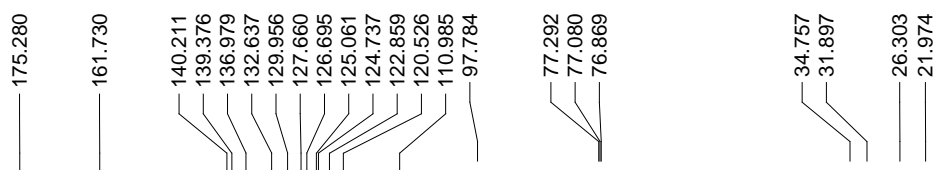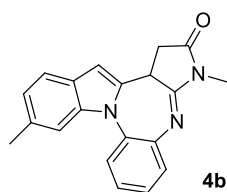

$^{13}\text{C}\{^1\text{H}\}$  (150 MHz,  $\text{CDCl}_3$ )

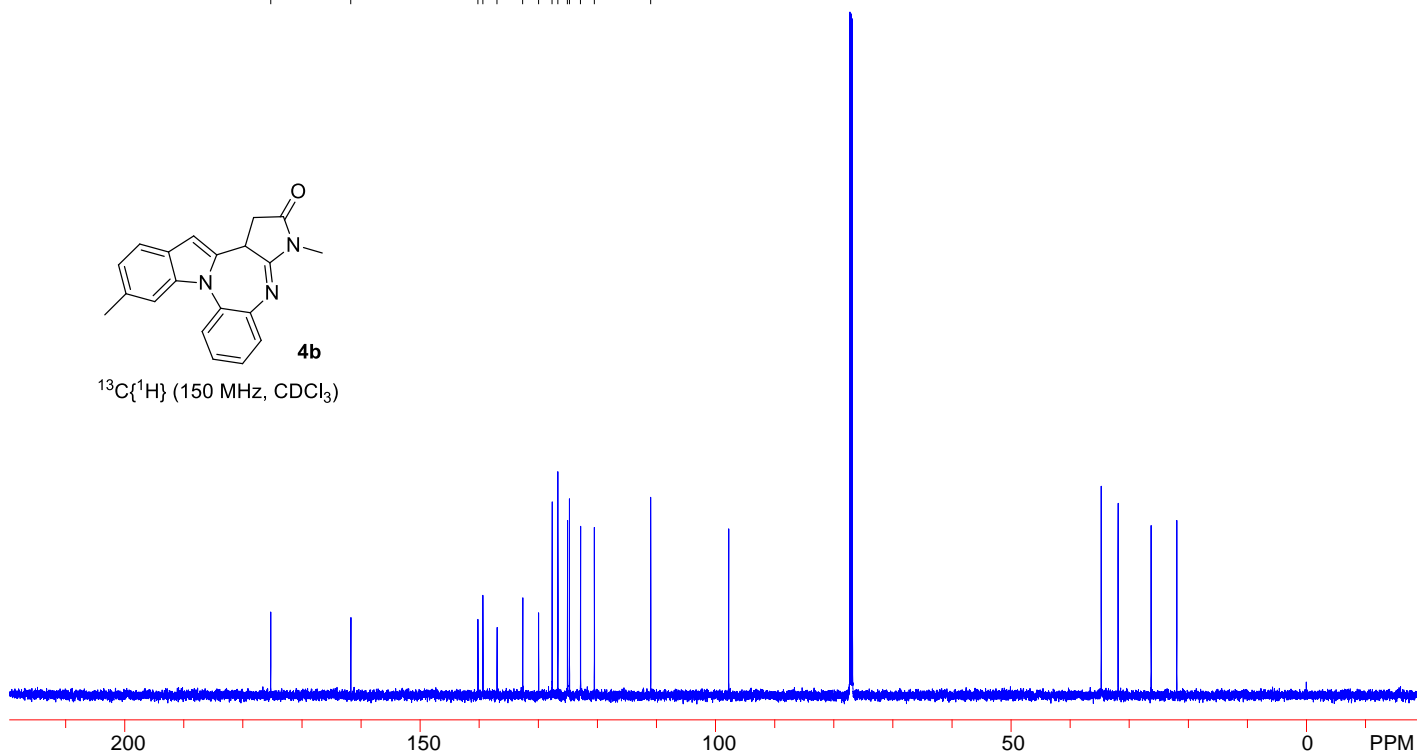

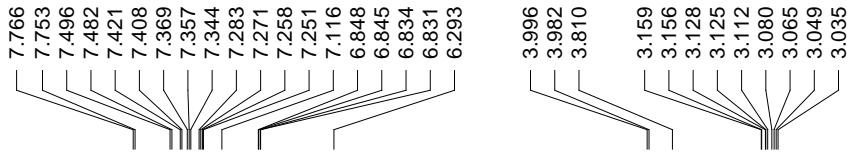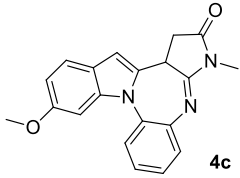

$^1\text{H NMR}$  (600 MHz,  $\text{CDCl}_3$ )

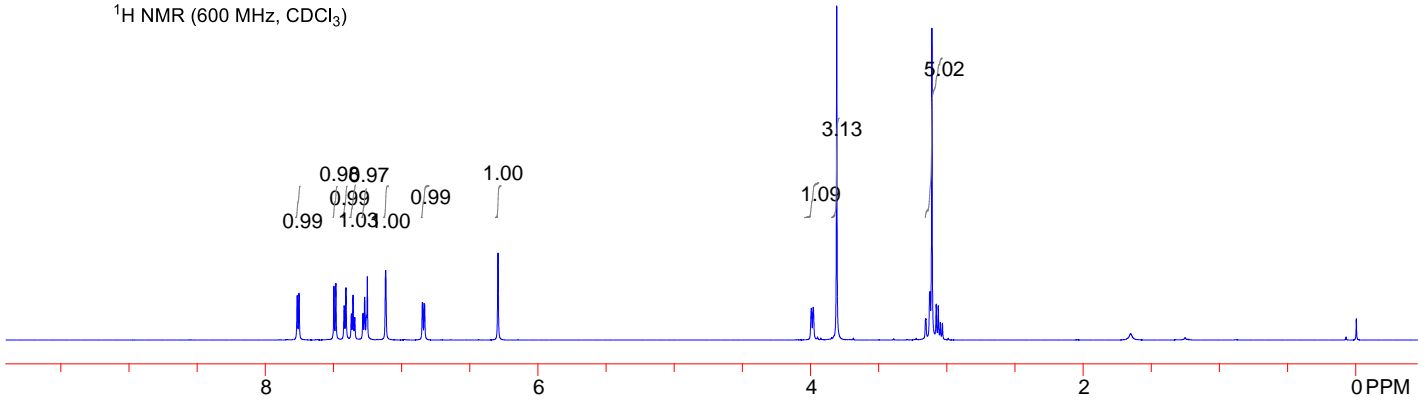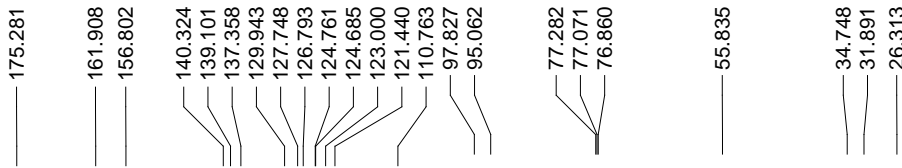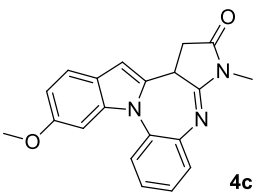

$^{13}\text{C}\{^1\text{H}\}$  (150 MHz,  $\text{CDCl}_3$ )

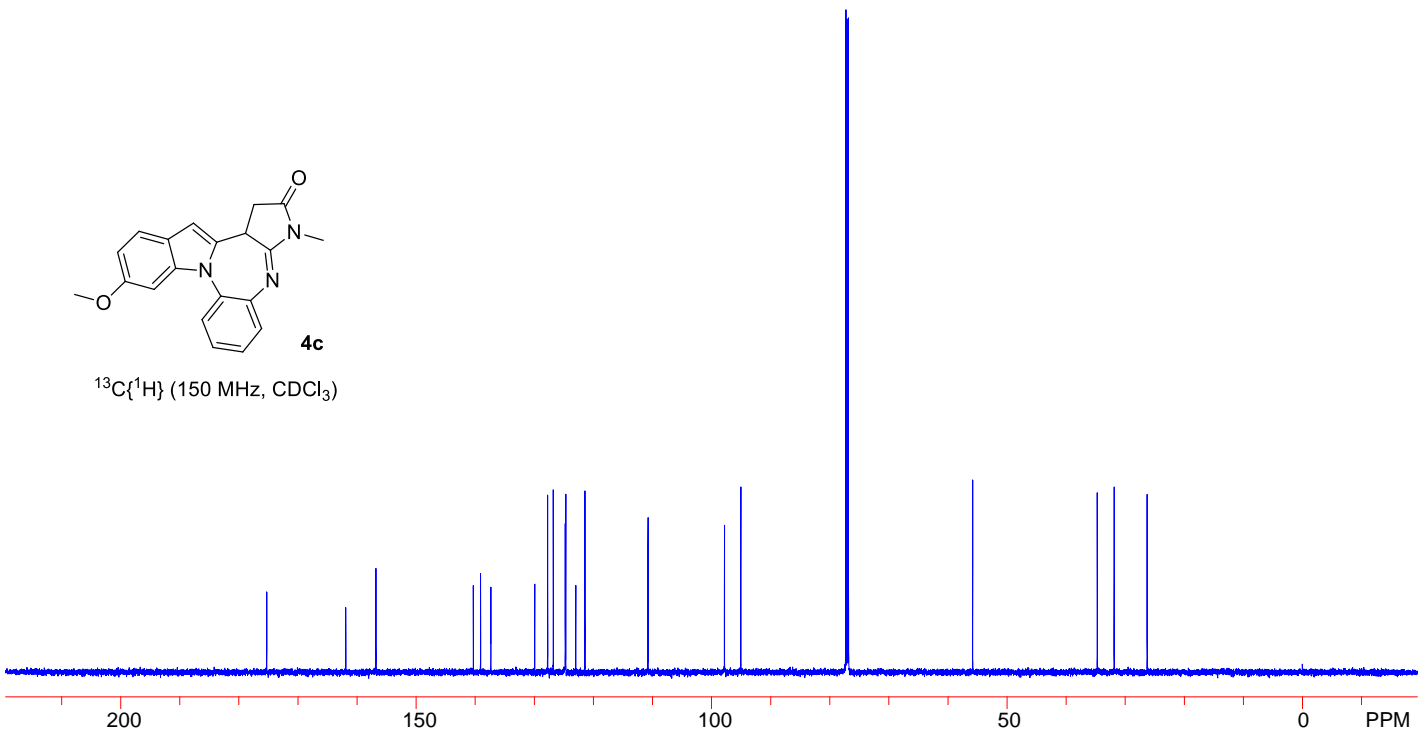

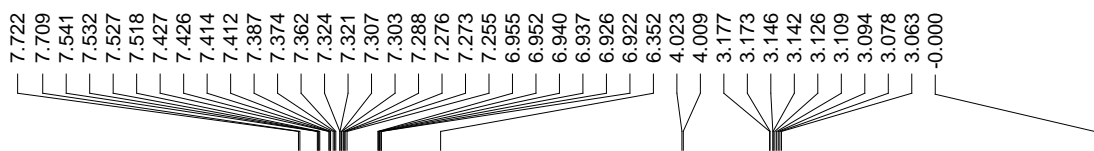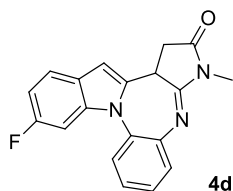

$^1\text{H NMR}$  (600 MHz,  $\text{CDCl}_3$ )

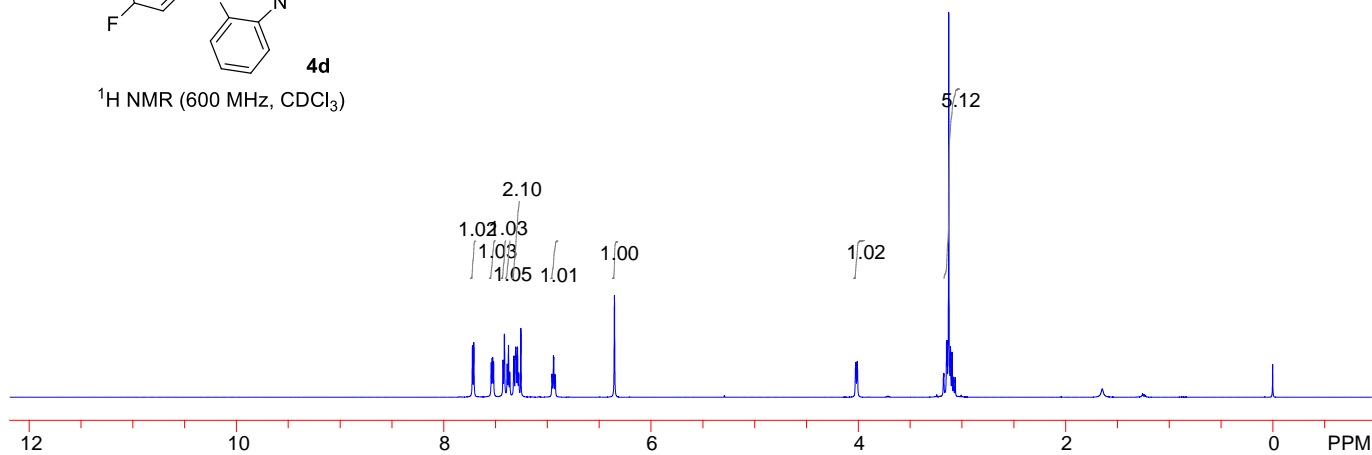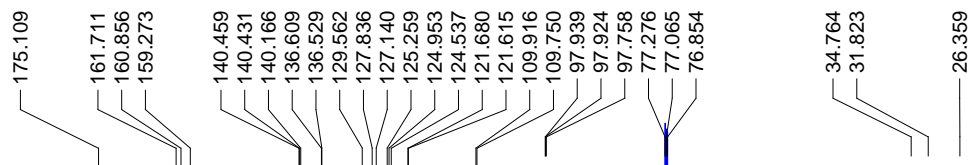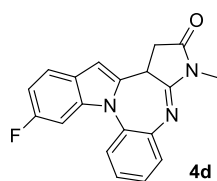

$^{13}\text{C}\{^1\text{H}\}$  (150 MHz,  $\text{CDCl}_3$ )

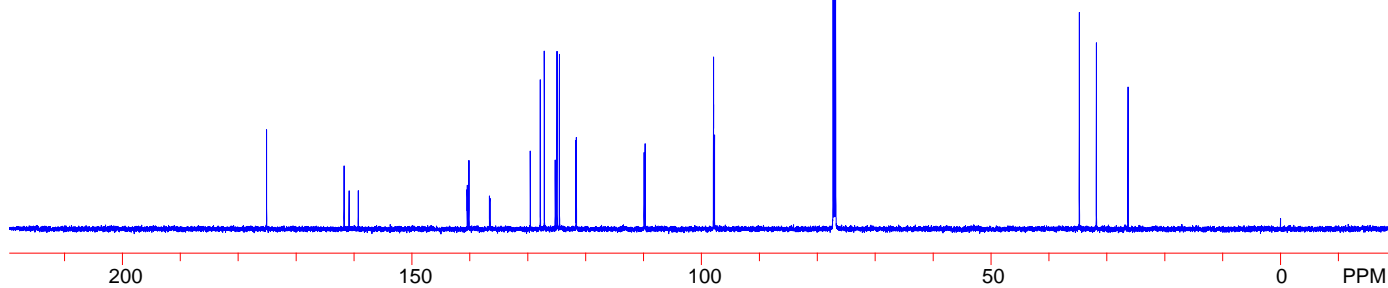

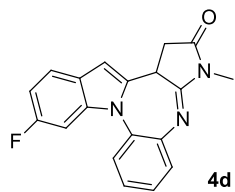

$^{19}\text{F}$  NMR (376 MHz,  $\text{CDCl}_3$ )

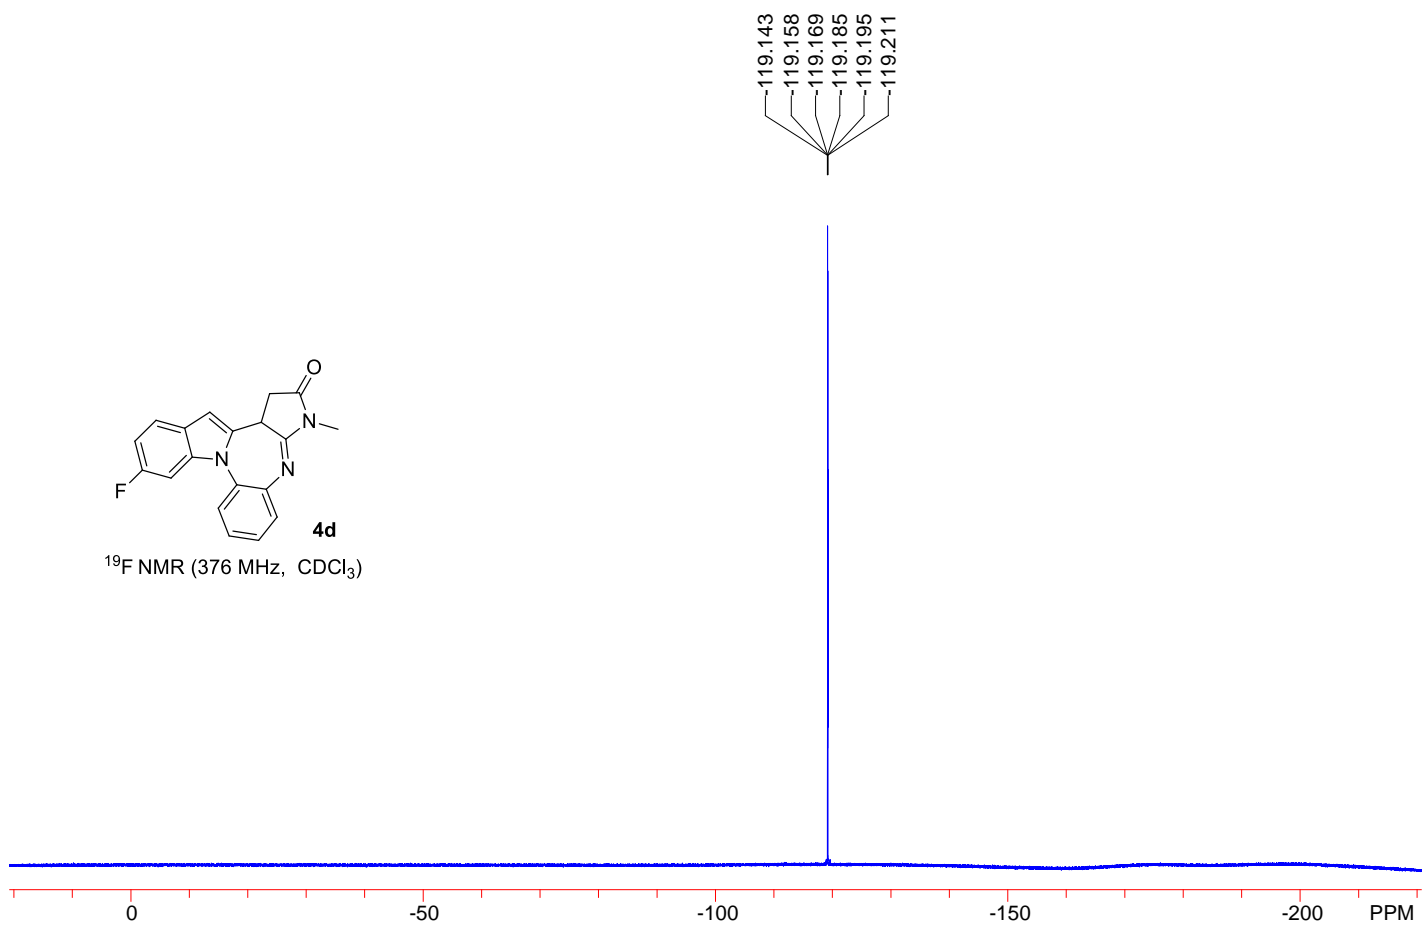

7.713  
7.694  
7.602  
7.515  
7.494  
7.426  
7.423  
7.407  
7.403  
7.391  
7.373  
7.354  
7.309  
7.305  
7.289  
7.271  
7.268  
7.246  
7.136  
7.133  
7.115  
7.112  
6.338  
3.987  
3.969  
3.172  
3.165  
3.126  
3.118  
3.108  
3.094  
3.072  
3.048  
3.026

-0.000

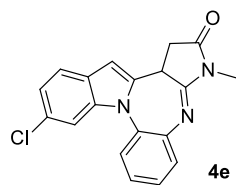

<sup>1</sup>H NMR (400 MHz, CDCl<sub>3</sub>)

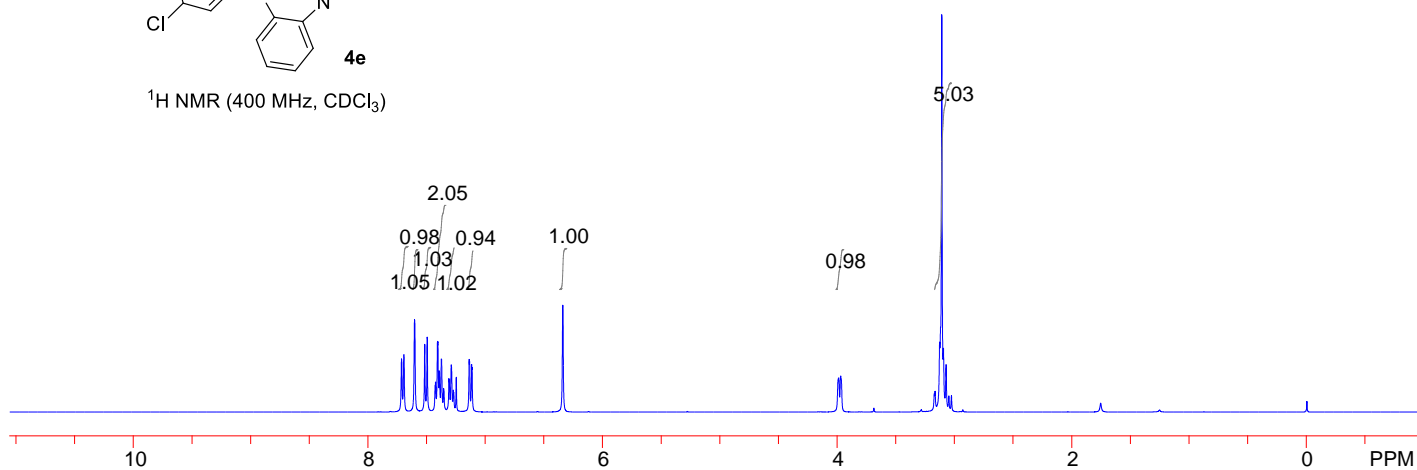

175.025  
161.597  
140.652  
140.191  
136.888  
129.364  
128.609  
127.845  
127.417  
127.230  
125.025  
124.755  
121.835  
121.738  
111.113  
97.987  
77.438  
77.120  
76.803  
34.750  
31.794  
26.368

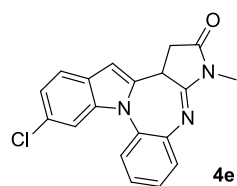

<sup>13</sup>C{<sup>1</sup>H} (100 MHz, CDCl<sub>3</sub>)

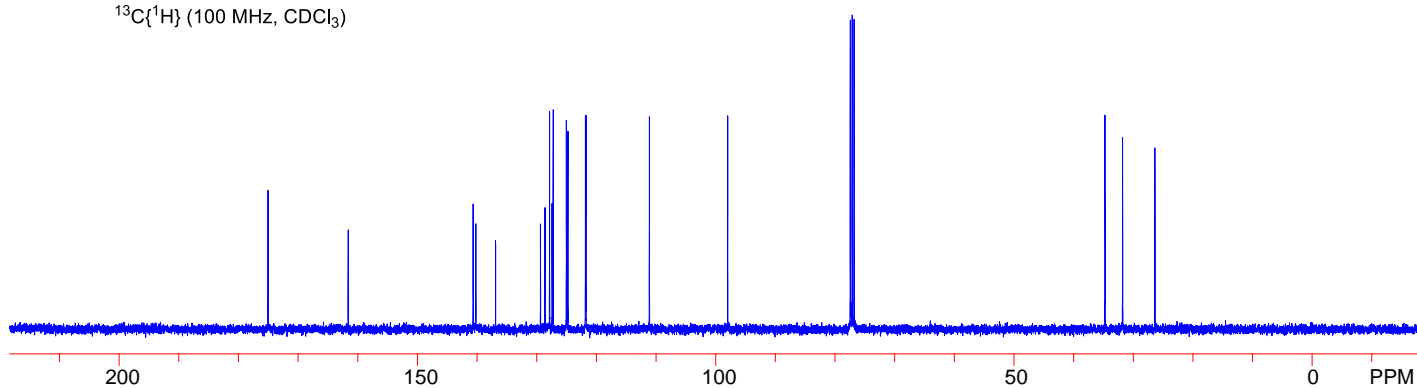

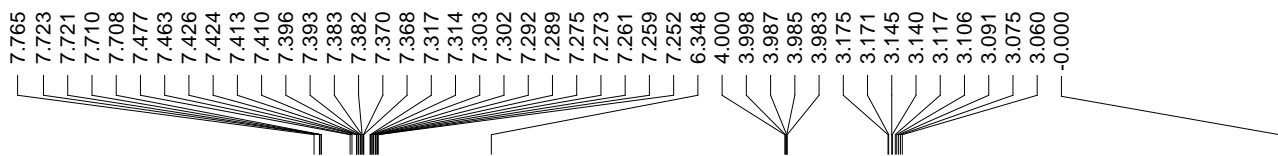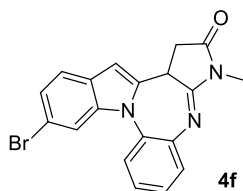

$^1\text{H NMR}$  (600 MHz,  $\text{CDCl}_3$ )

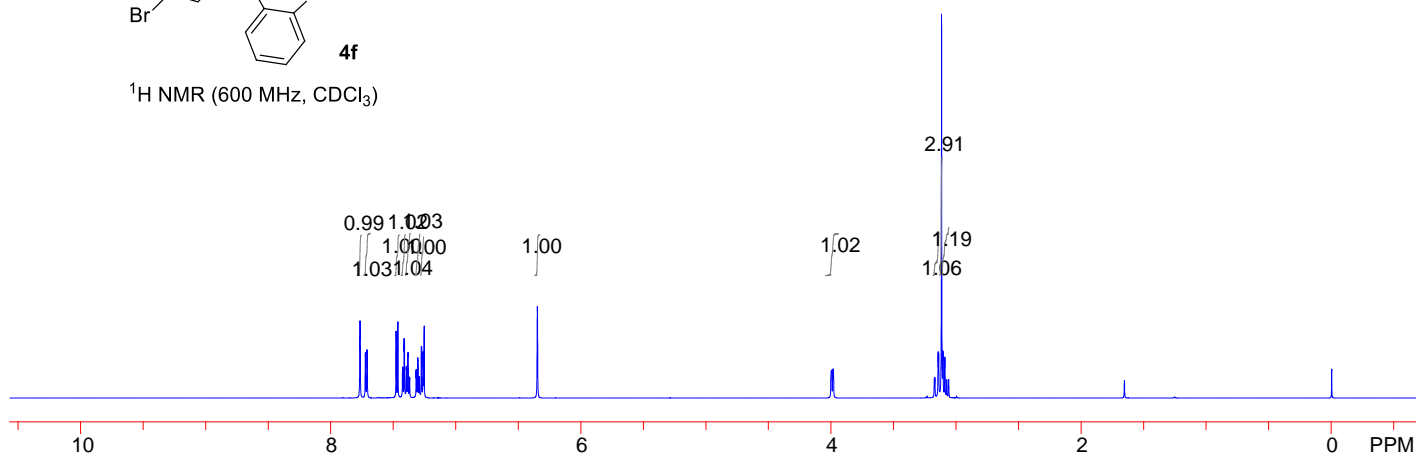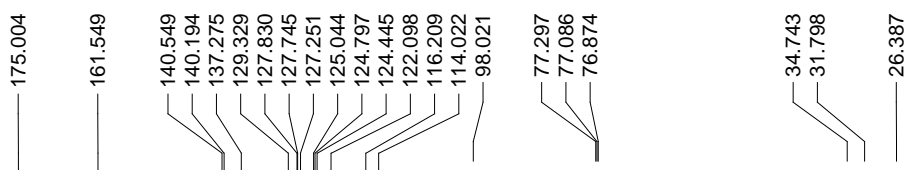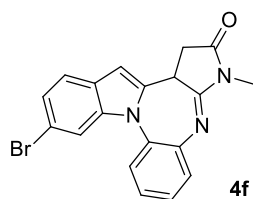

$^{13}\text{C}\{^1\text{H}\}$  (150 MHz,  $\text{CDCl}_3$ )

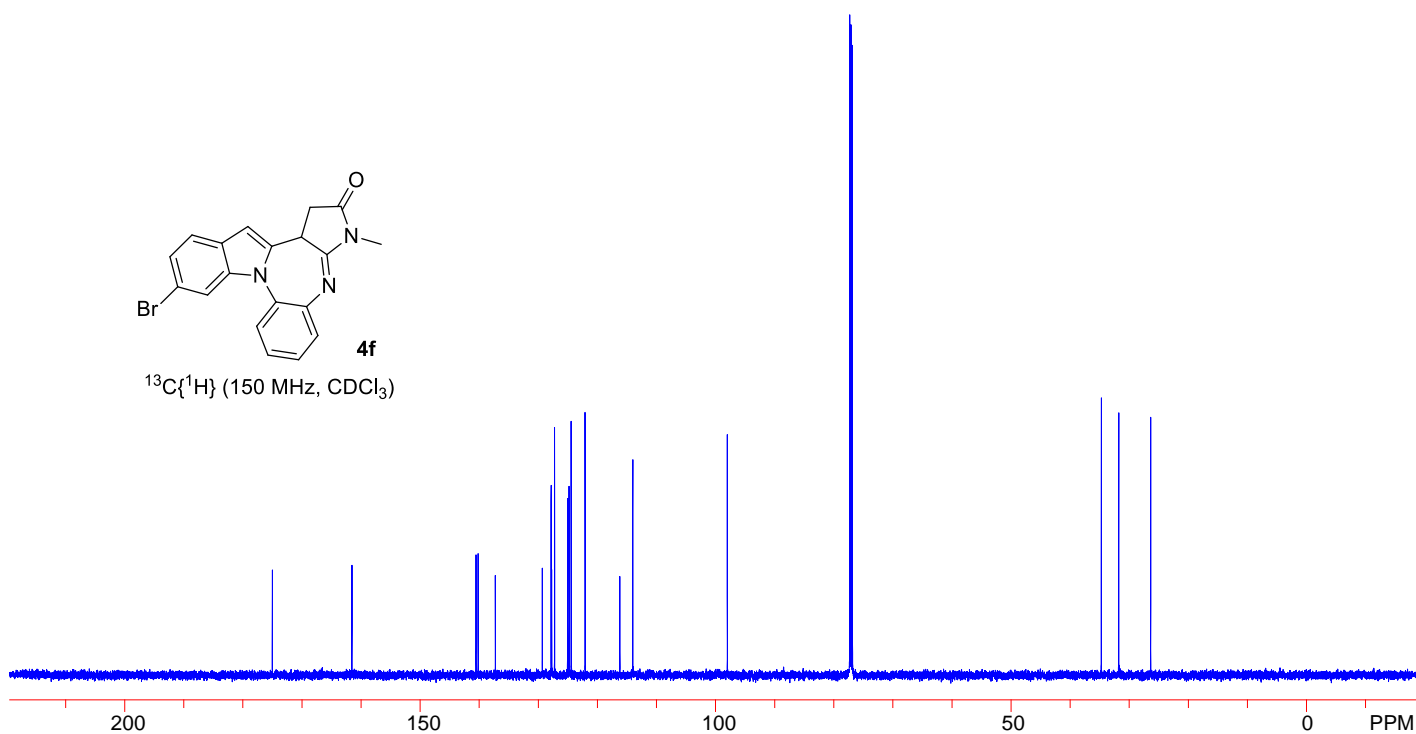

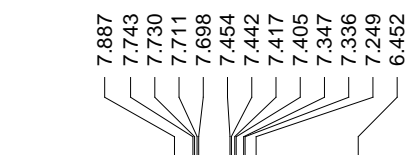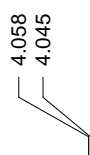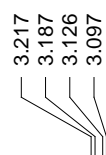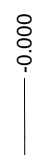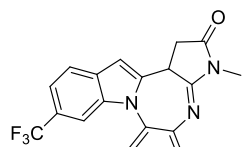

**4g**

$^1\text{H NMR}$  (600 MHz,  $\text{CDCl}_3$ )

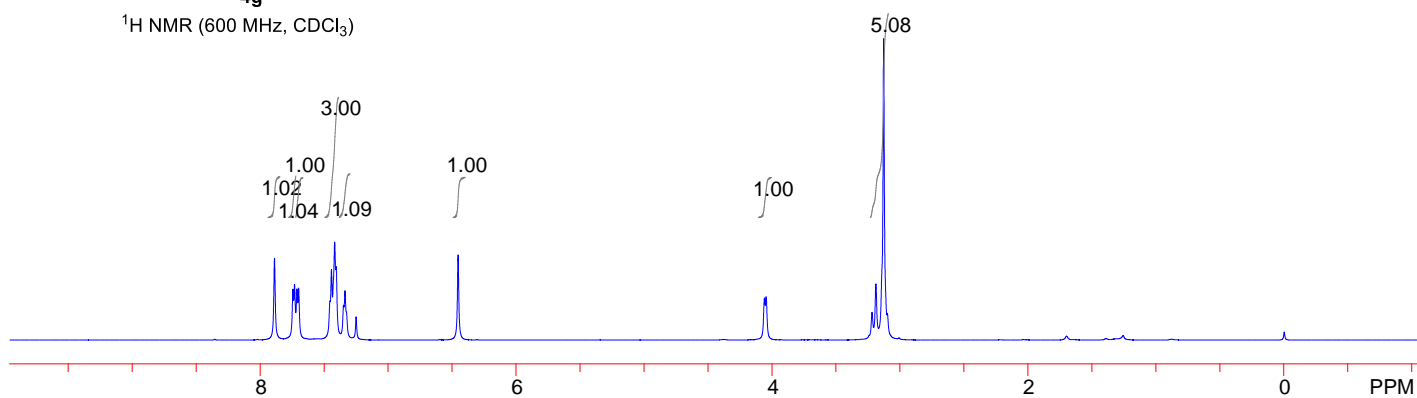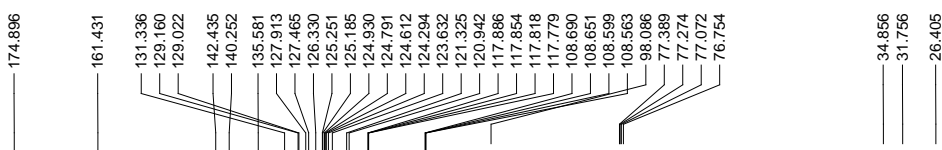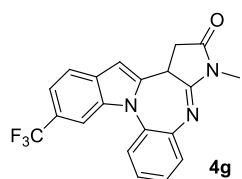

**4g**

$^{13}\text{C}\{^1\text{H}\}$  (100 MHz,  $\text{CDCl}_3$ )

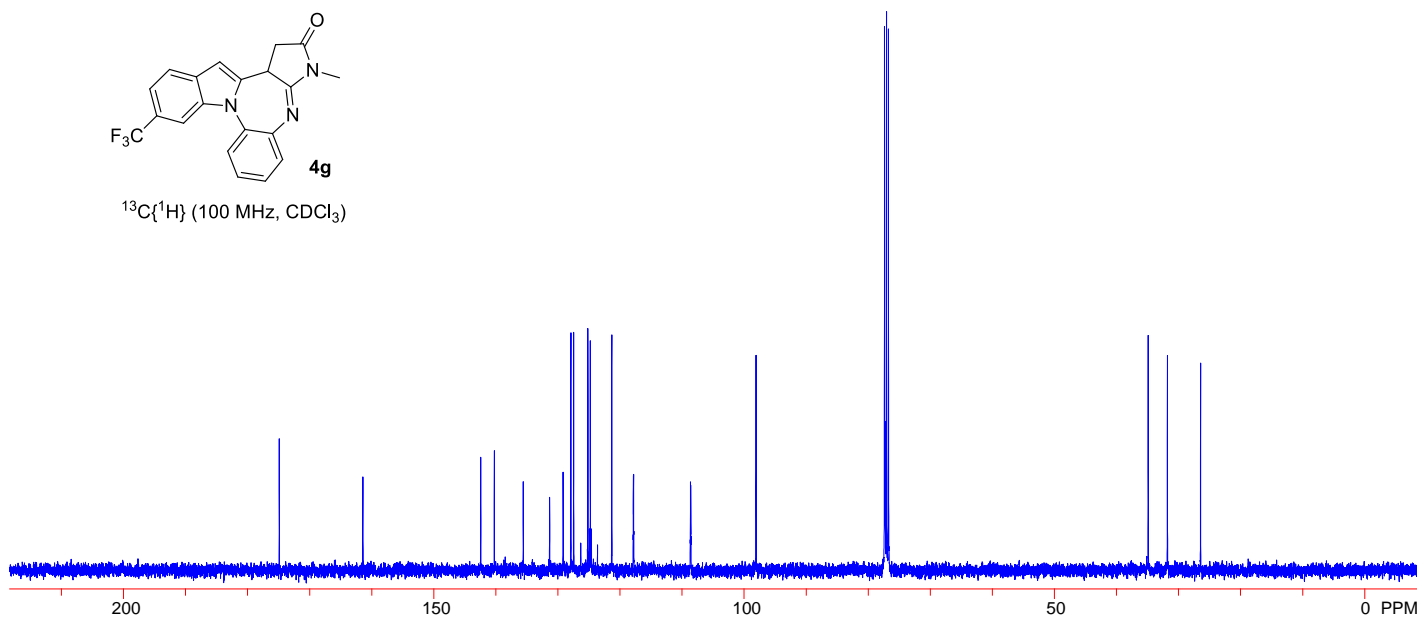



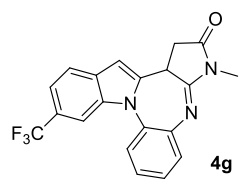

$^{19}\text{F}$  NMR (565 MHz,  $\text{CDCl}_3$ )

-60.602

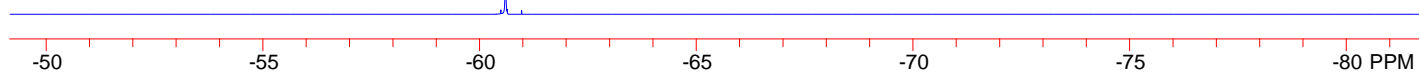

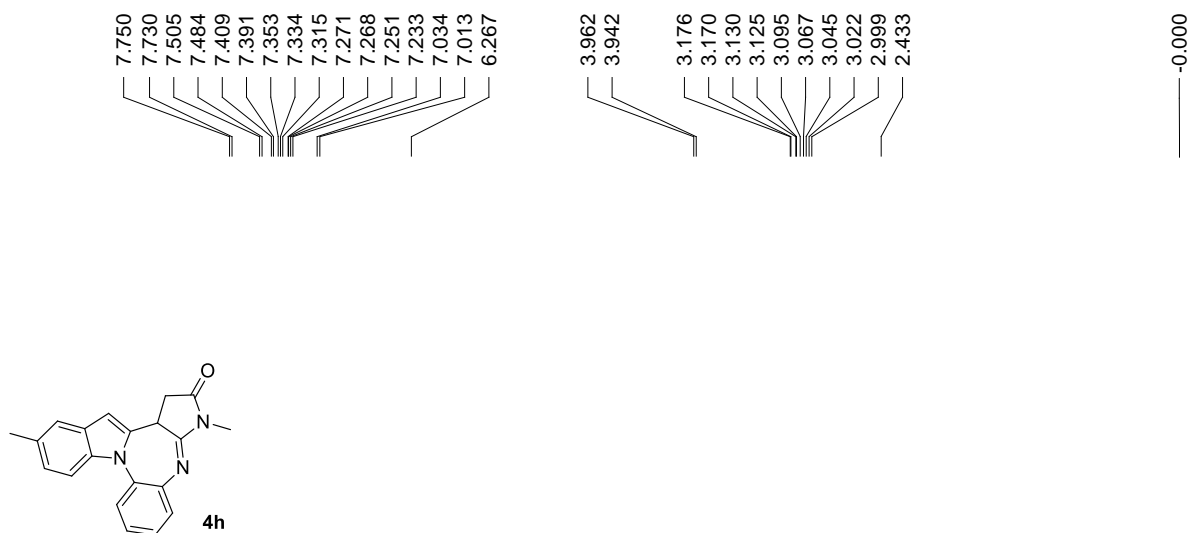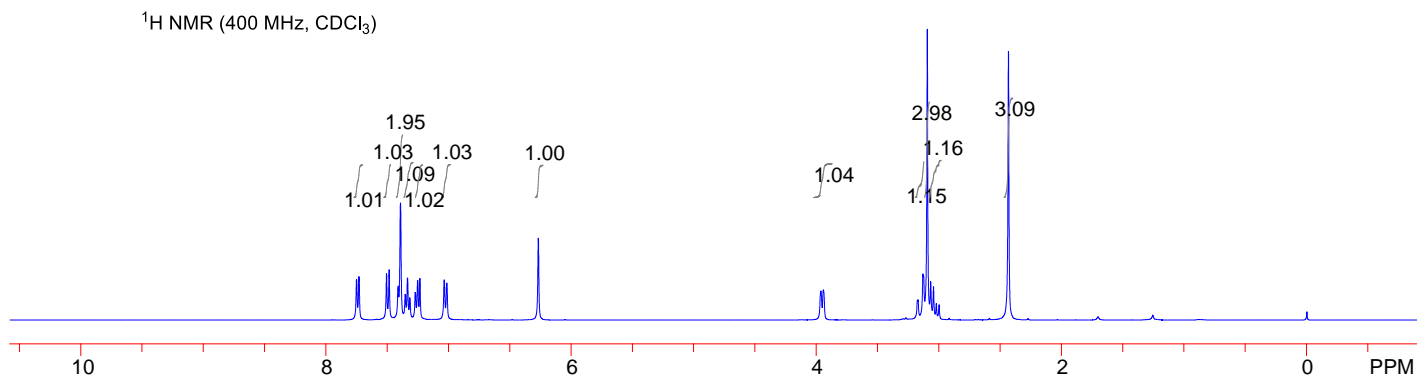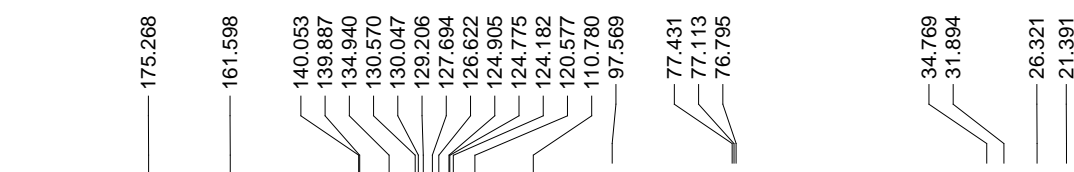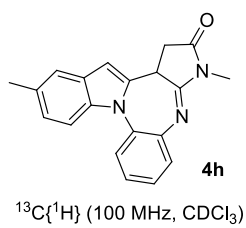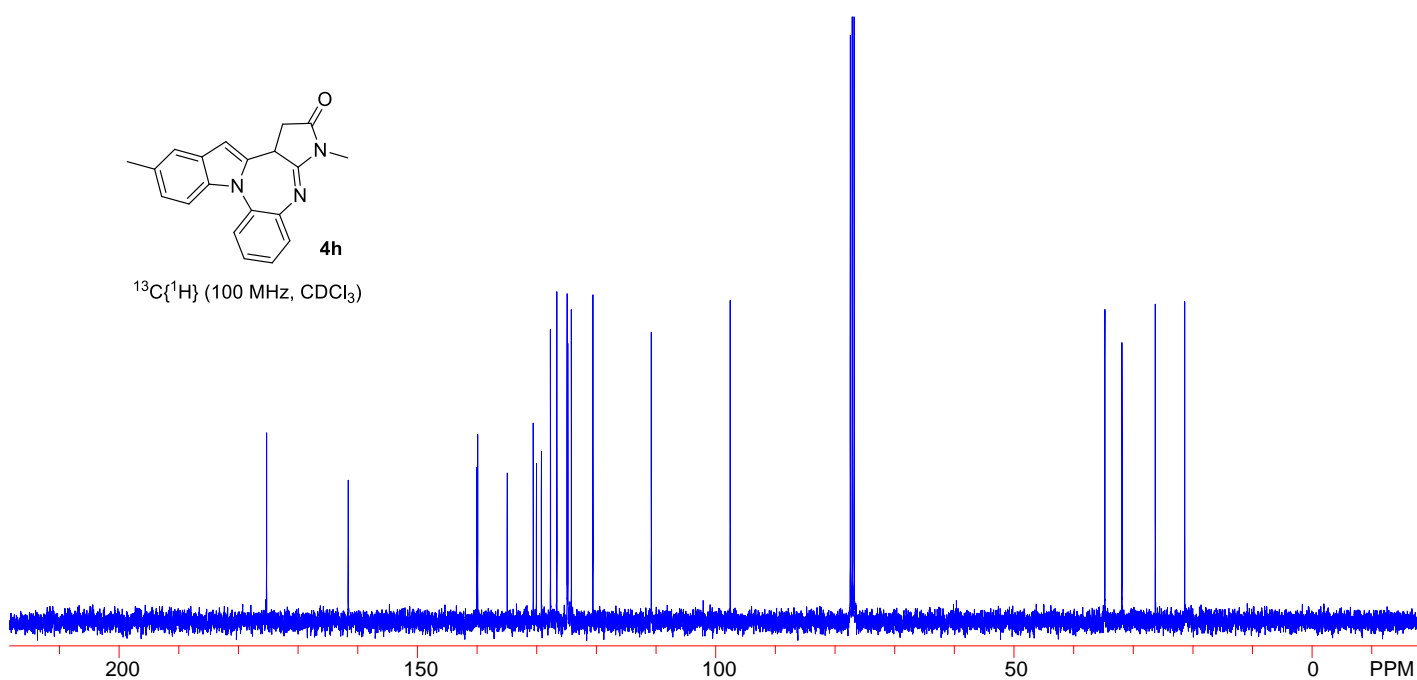

7.733  
7.714  
7.509  
7.487  
7.414  
7.411  
7.394  
7.352  
7.350  
7.333  
7.314  
7.271  
7.268  
7.249  
7.244  
7.233  
7.059  
7.054  
6.860  
6.855  
6.838  
6.832  
6.272  
3.944  
3.925  
3.832  
3.170  
3.163  
3.124  
3.118  
3.100  
3.072  
3.049  
3.026  
3.004

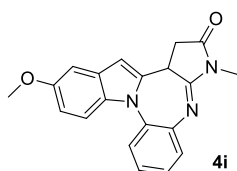

$^1\text{H NMR}$  (400 MHz,  $\text{CDCl}_3$ )

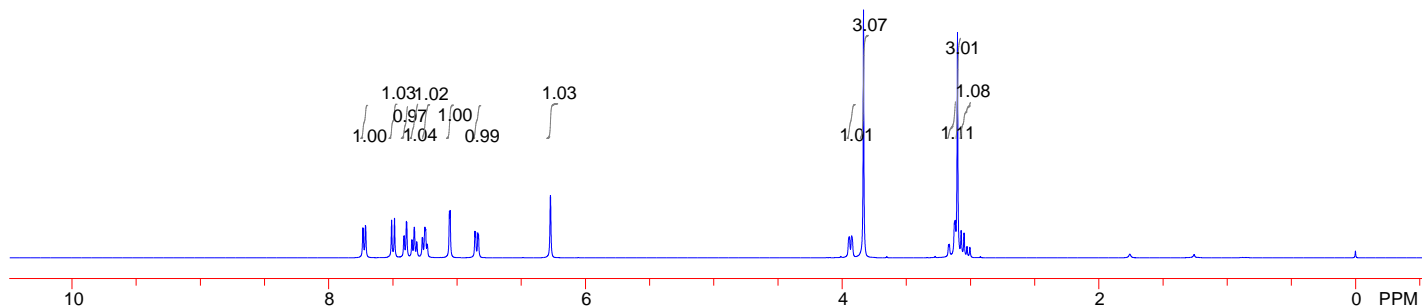

175.241  
161.508  
155.007  
140.231  
139.983  
131.673  
130.019  
129.553  
127.746  
126.597  
124.807  
124.768  
112.501  
111.952  
102.606  
97.728  
77.435  
77.117  
76.792  
55.862  
34.777  
31.871  
26.330

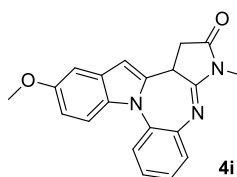

$^{13}\text{C}\{^1\text{H}\}$  (100 MHz,  $\text{CDCl}_3$ )

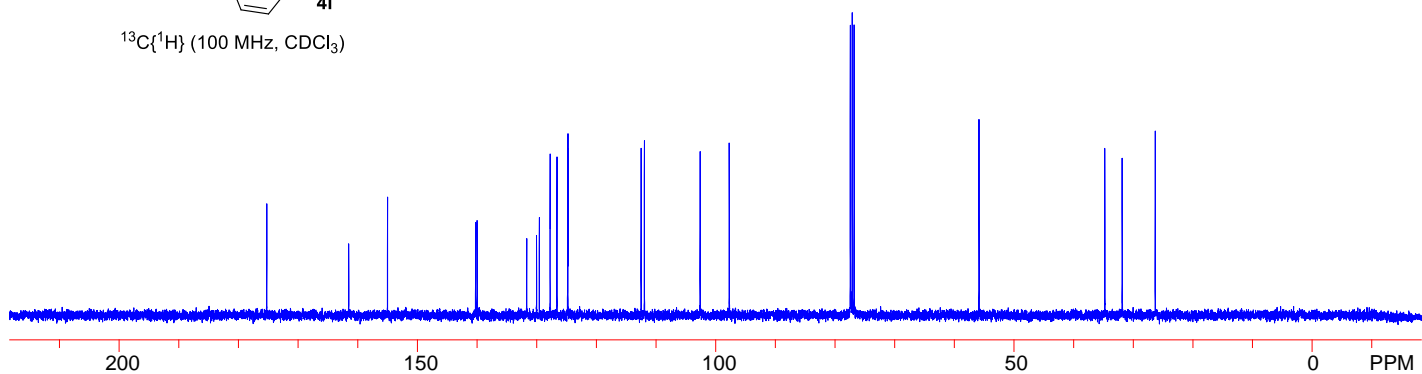

7.722  
7.721  
7.709  
7.539  
7.532  
7.524  
7.517  
7.427  
7.426  
7.414  
7.412  
7.376  
7.375  
7.363  
7.351  
7.349  
7.286  
7.284  
7.273  
7.261  
7.258  
7.249  
7.243  
6.957  
6.953  
6.942  
6.938  
6.927  
6.923  
6.327  
3.983  
3.970  
3.176  
3.172  
3.146  
3.141  
3.116  
3.096  
3.081  
3.065  
3.050  
-0.000

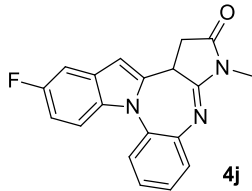

$^1\text{H NMR}$  (600 MHz,  $\text{CDCl}_3$ )

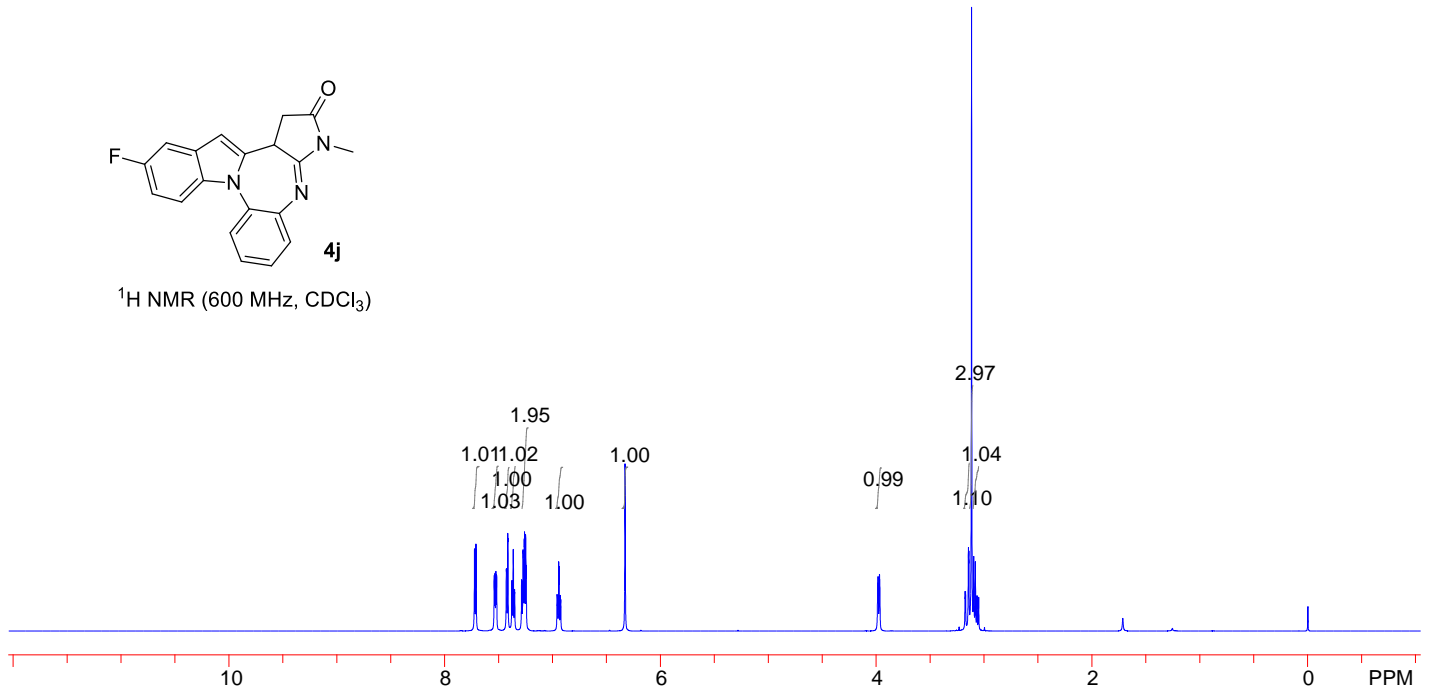

10 8 6 4 2 0 PPM

175.054  
161.539  
159.209  
157.637  
141.291  
140.124  
133.112  
129.710  
129.462  
129.402  
127.829  
126.972  
124.885  
124.746  
111.987  
111.927  
110.932  
110.764  
105.898  
105.744  
97.922  
97.895  
77.311  
77.099  
76.887  
34.820  
31.781  
26.369

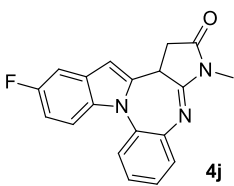

$^{13}\text{C}\{^1\text{H}\}$  (150 MHz,  $\text{CDCl}_3$ )

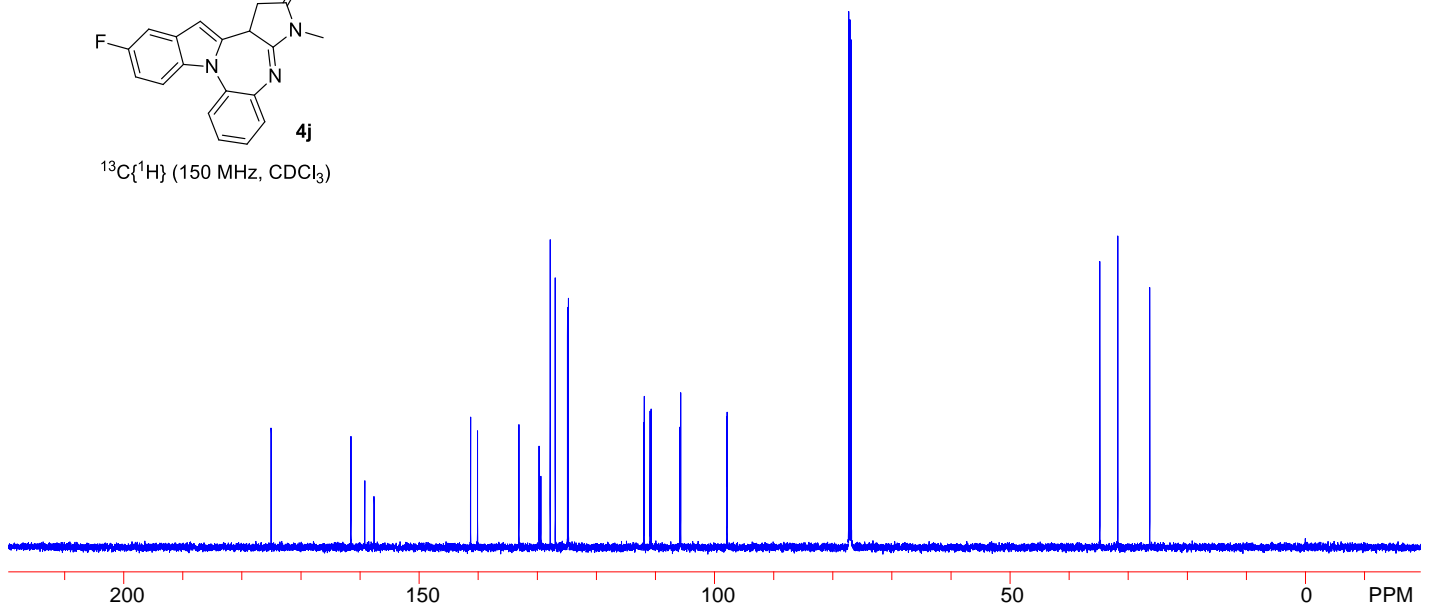

200 150 100 50 0 PPM

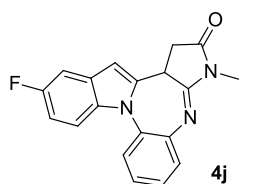

$^{19}\text{F}$  NMR (376 MHz,  $\text{CDCl}_3$ )

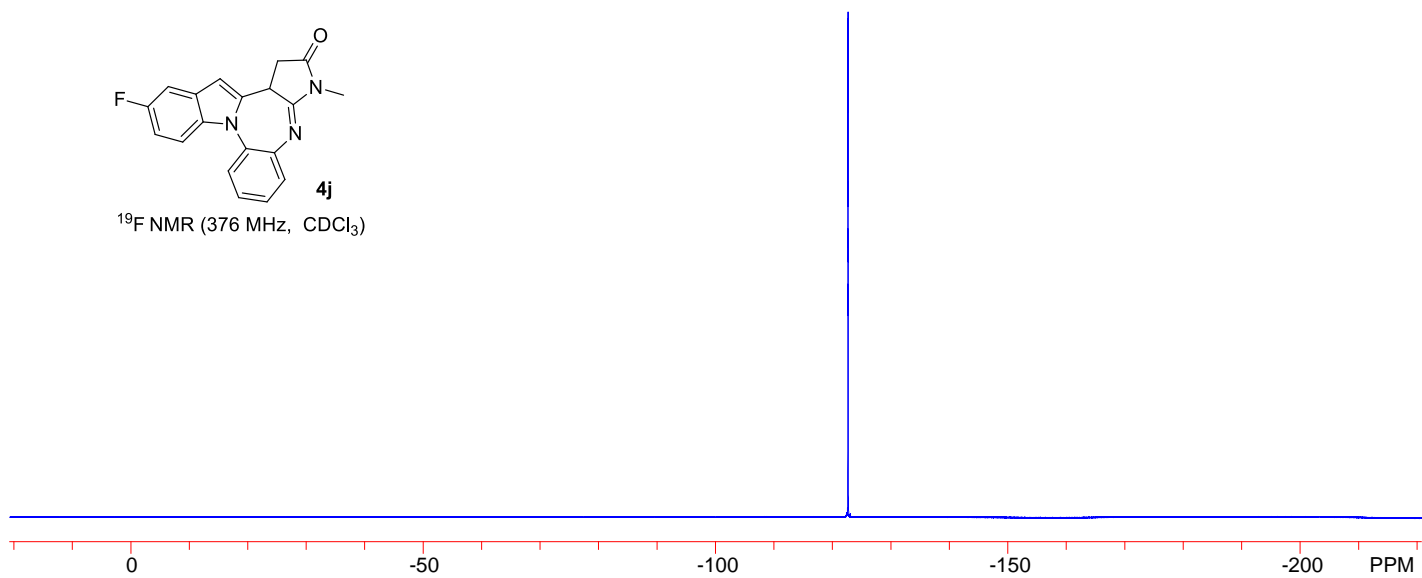

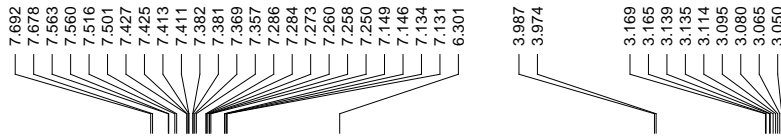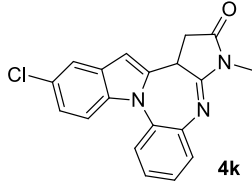

$^1\text{H NMR}$  (600 MHz,  $\text{CDCl}_3$ )

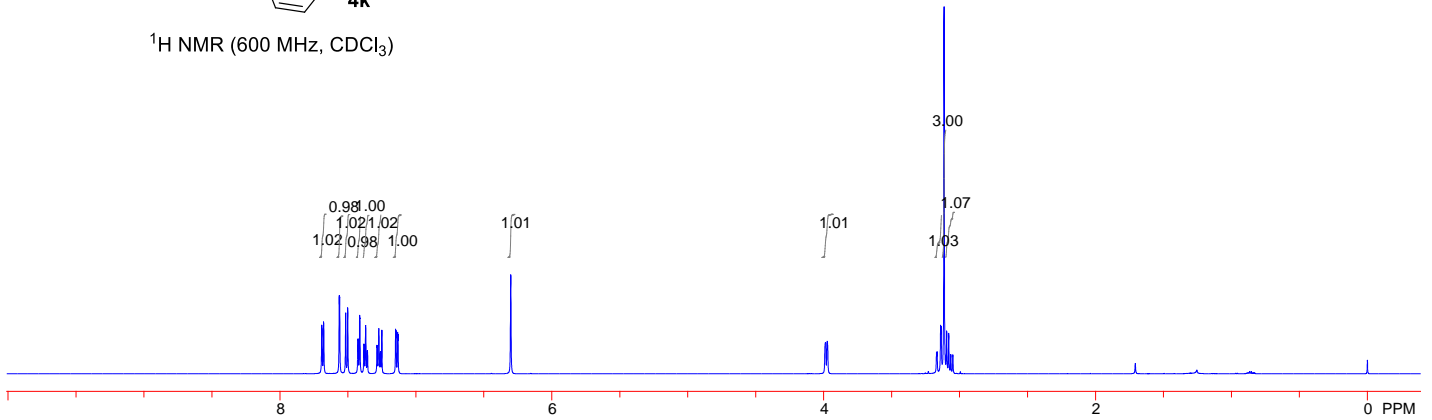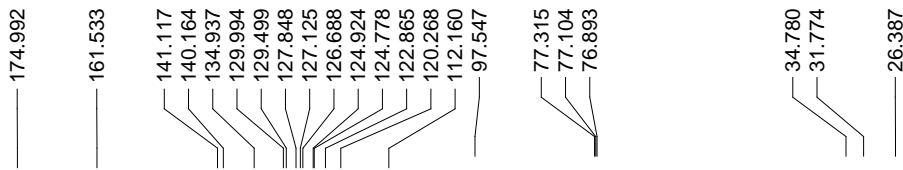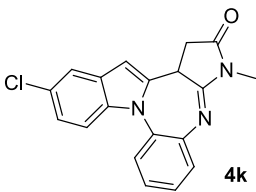

$^{13}\text{C}\{^1\text{H}\}$  (150 MHz,  $\text{CDCl}_3$ )

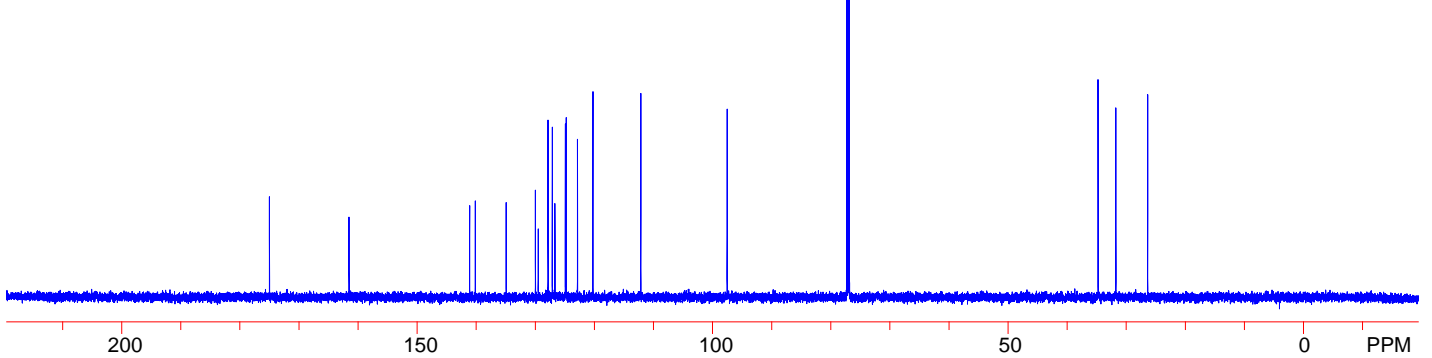

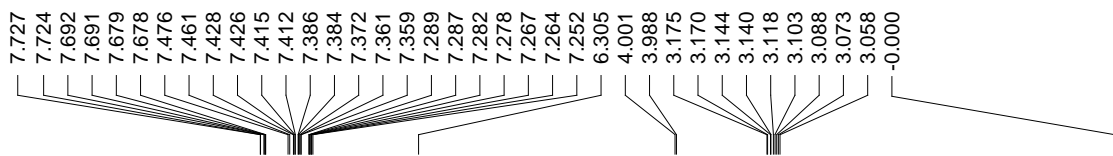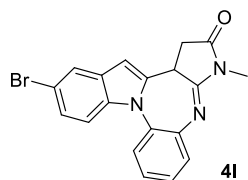

$^1\text{H NMR}$  (600 MHz,  $\text{CDCl}_3$ )

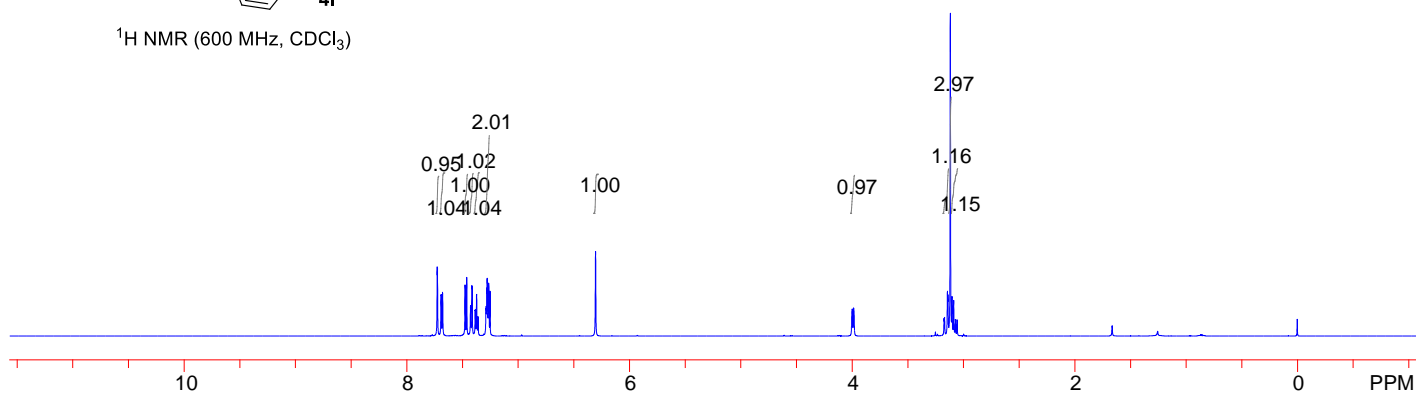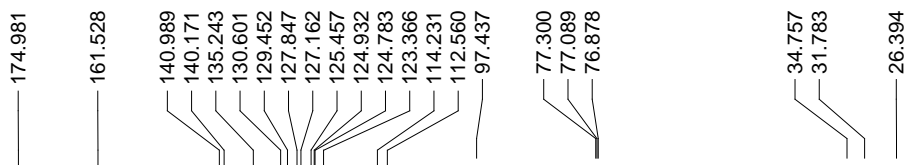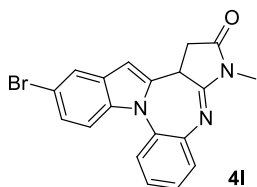

$^{13}\text{C}\{^1\text{H}\}$  (150 MHz,  $\text{CDCl}_3$ )

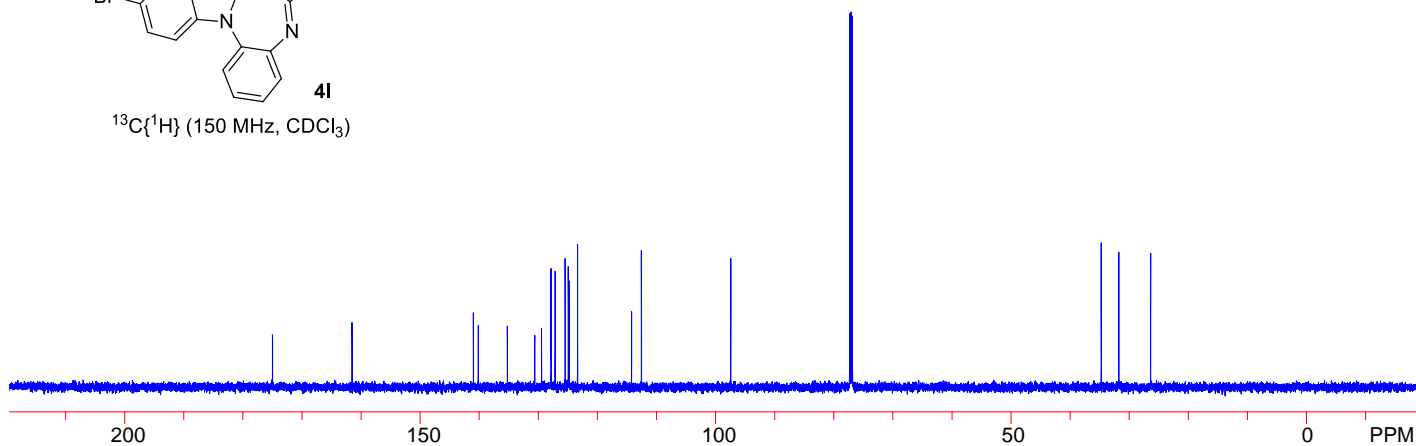

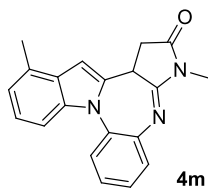

<sup>1</sup>H NMR (400 MHz, CDCl<sub>3</sub>)

- 7.784
- 7.764
- 7.477
- 7.456
- 7.421
- 7.402
- 7.372
- 7.354
- 7.336
- 7.289
- 7.271
- 7.249
- 7.147
- 7.128
- 7.108
- 6.988
- 6.971
- 6.388
- 4.039
- 4.017
- 3.254
- 3.250
- 3.209
- 3.116
- 3.086
- 3.063
- 2.550

-0.000

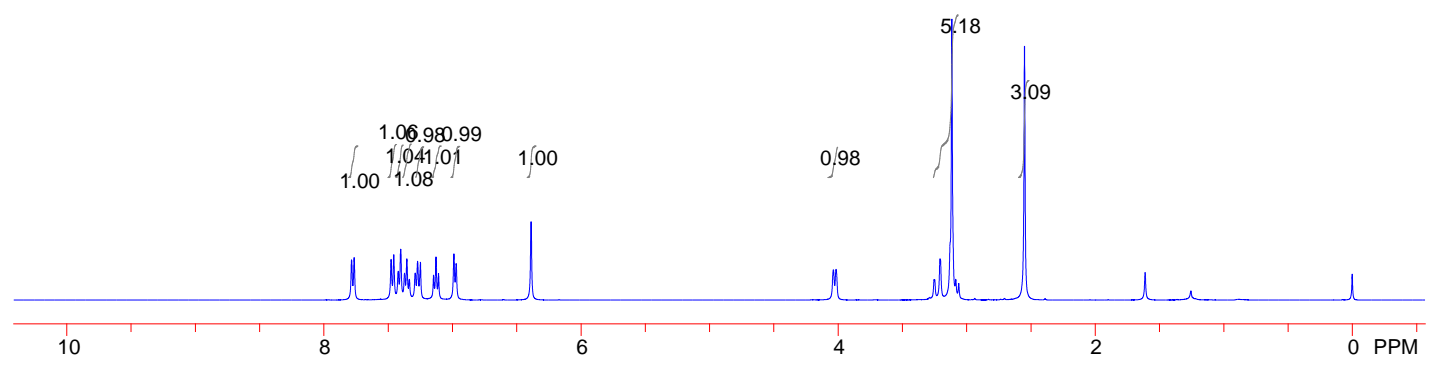

- 175.322
- 161.655
- 140.194
- 139.311
- 136.367
- 130.410
- 130.015
- 128.682
- 127.625
- 126.775
- 125.106
- 124.756
- 122.779
- 121.367
- 108.725
- 96.427
- 77.281
- 77.069
- 76.857
- 34.808
- 31.935
- 26.343
- 18.679

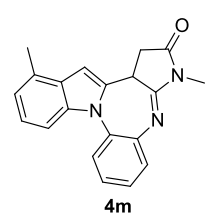

<sup>13</sup>C{<sup>1</sup>H} (150 MHz, CDCl<sub>3</sub>)

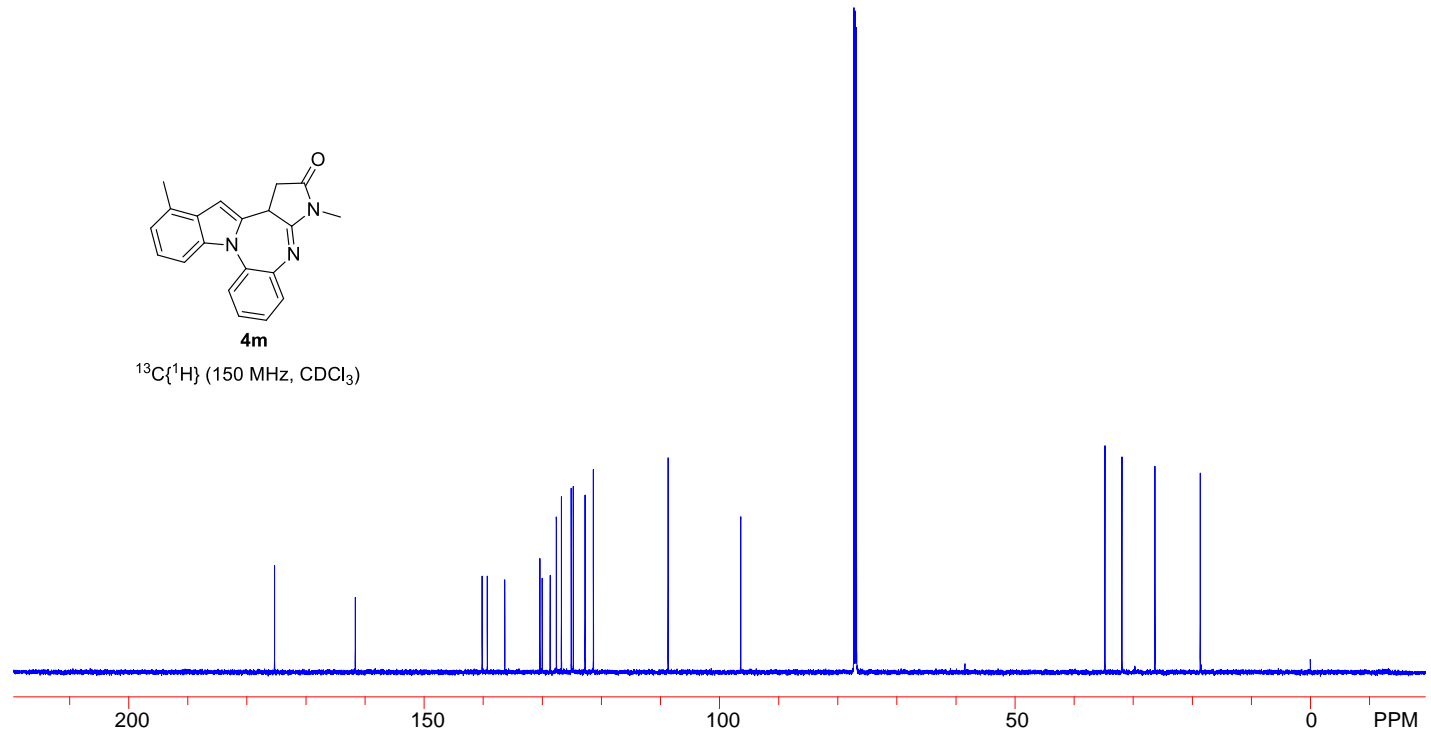



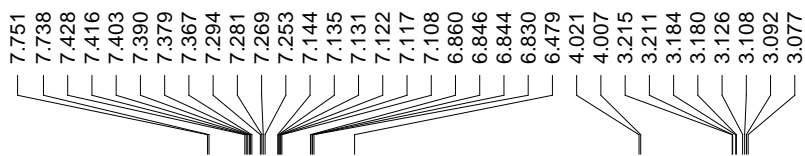

-0.000

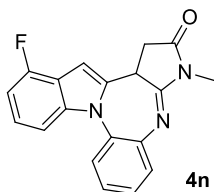

$^1\text{H NMR}$  (600 MHz,  $\text{CDCl}_3$ )

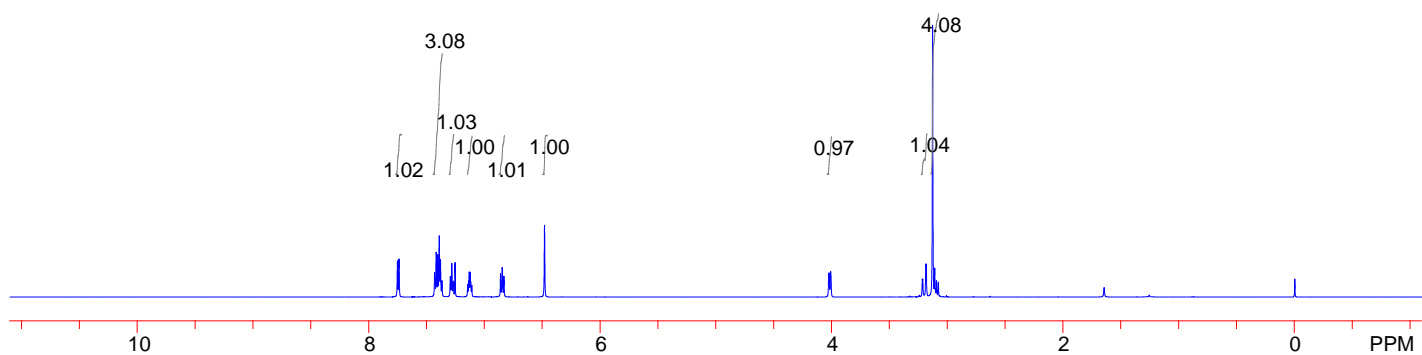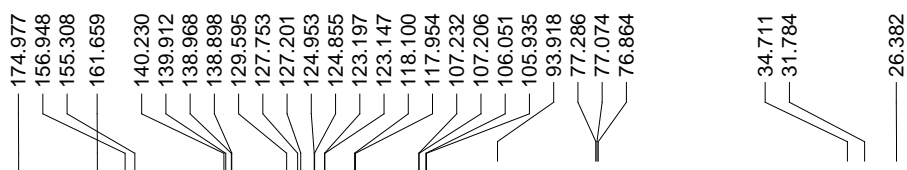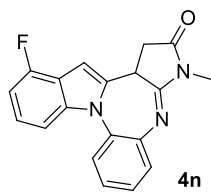

$^{13}\text{C}\{^1\text{H}\}$  (150 MHz,  $\text{CDCl}_3$ )

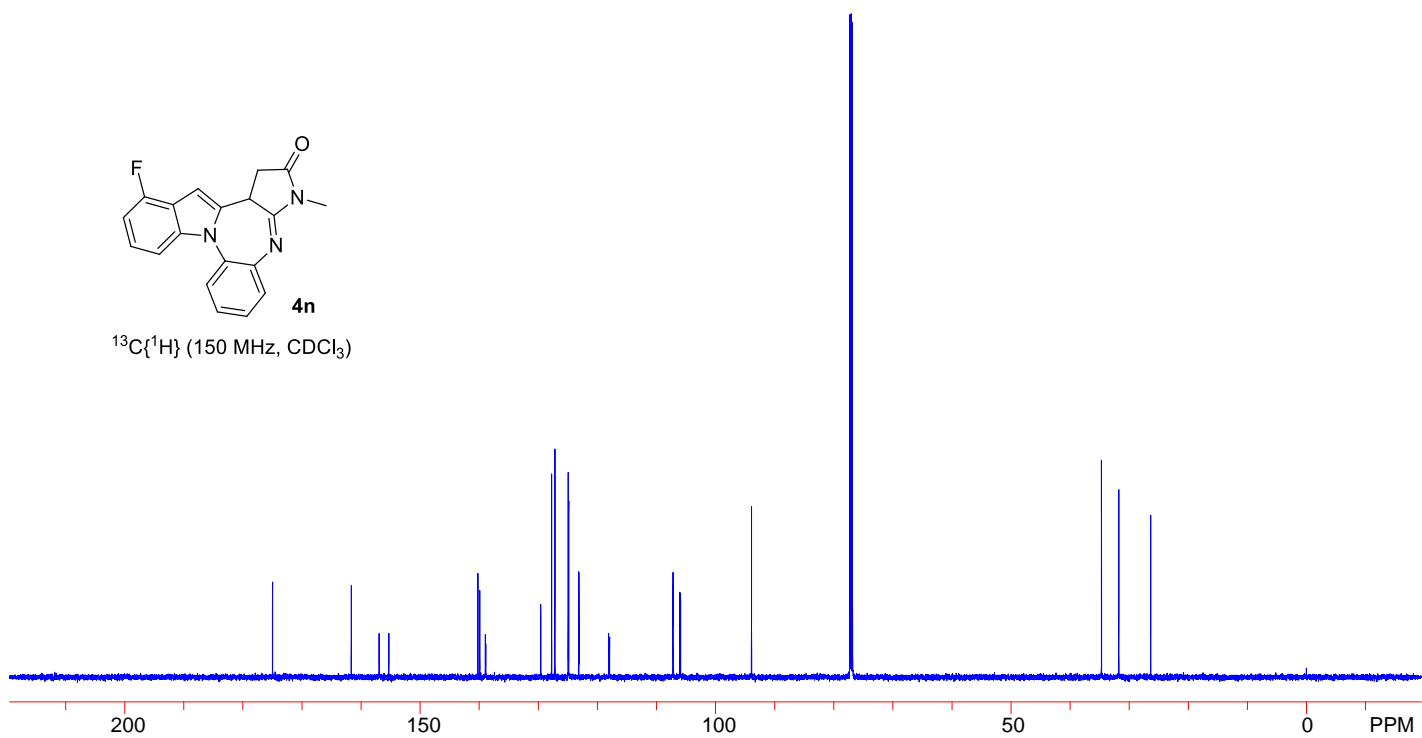

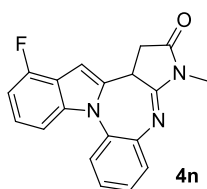

$^{19}\text{F}$  NMR (376 MHz,  $\text{CDCl}_3$ )

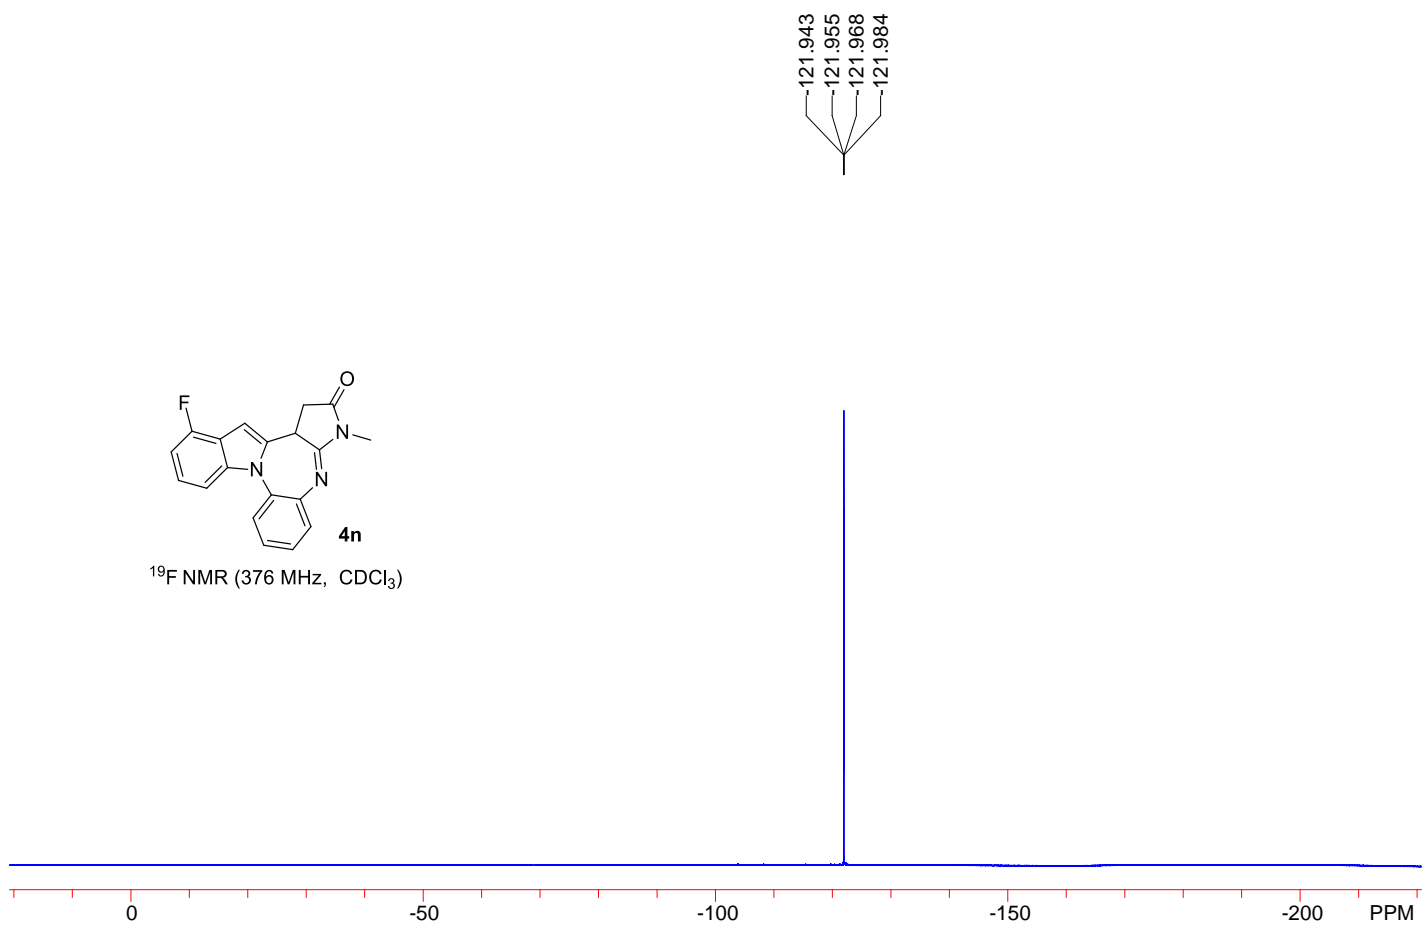

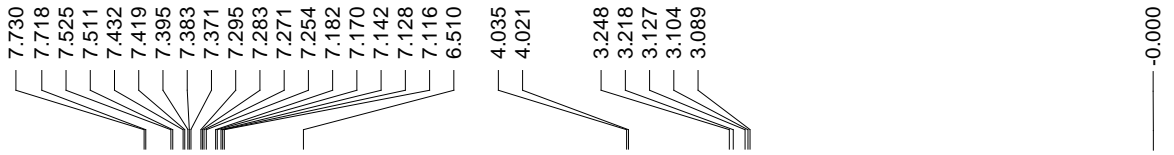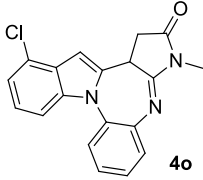

$^1\text{H}$  NMR (600 MHz,  $\text{CDCl}_3$ )

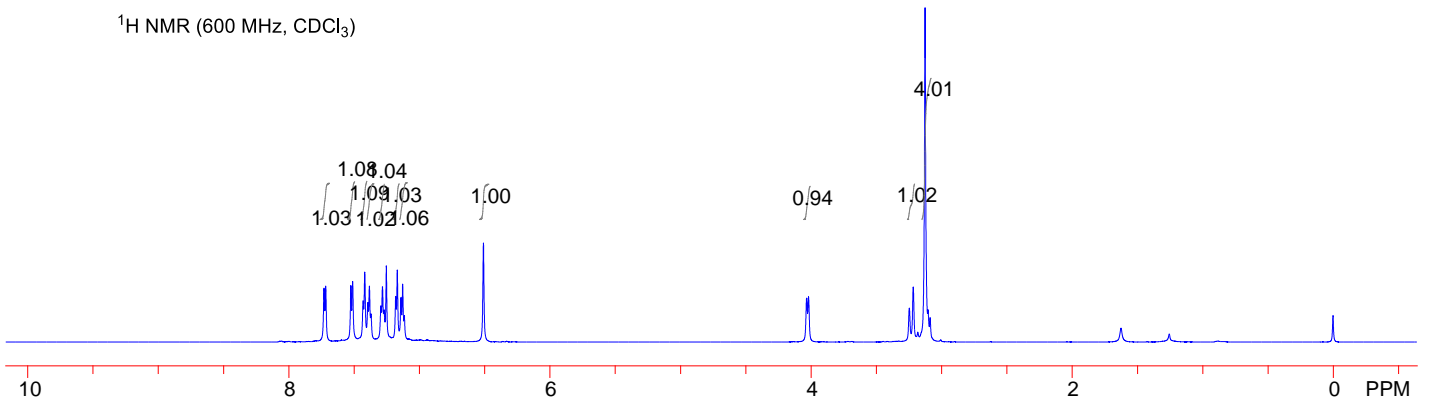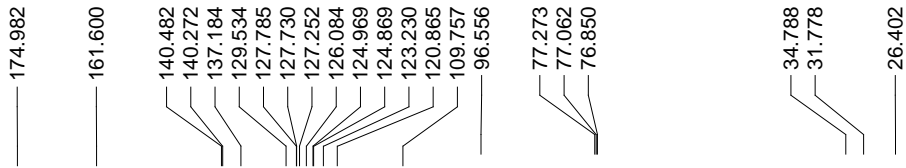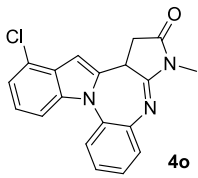

$^{13}\text{C}\{^1\text{H}\}$  (150 MHz,  $\text{CDCl}_3$ )

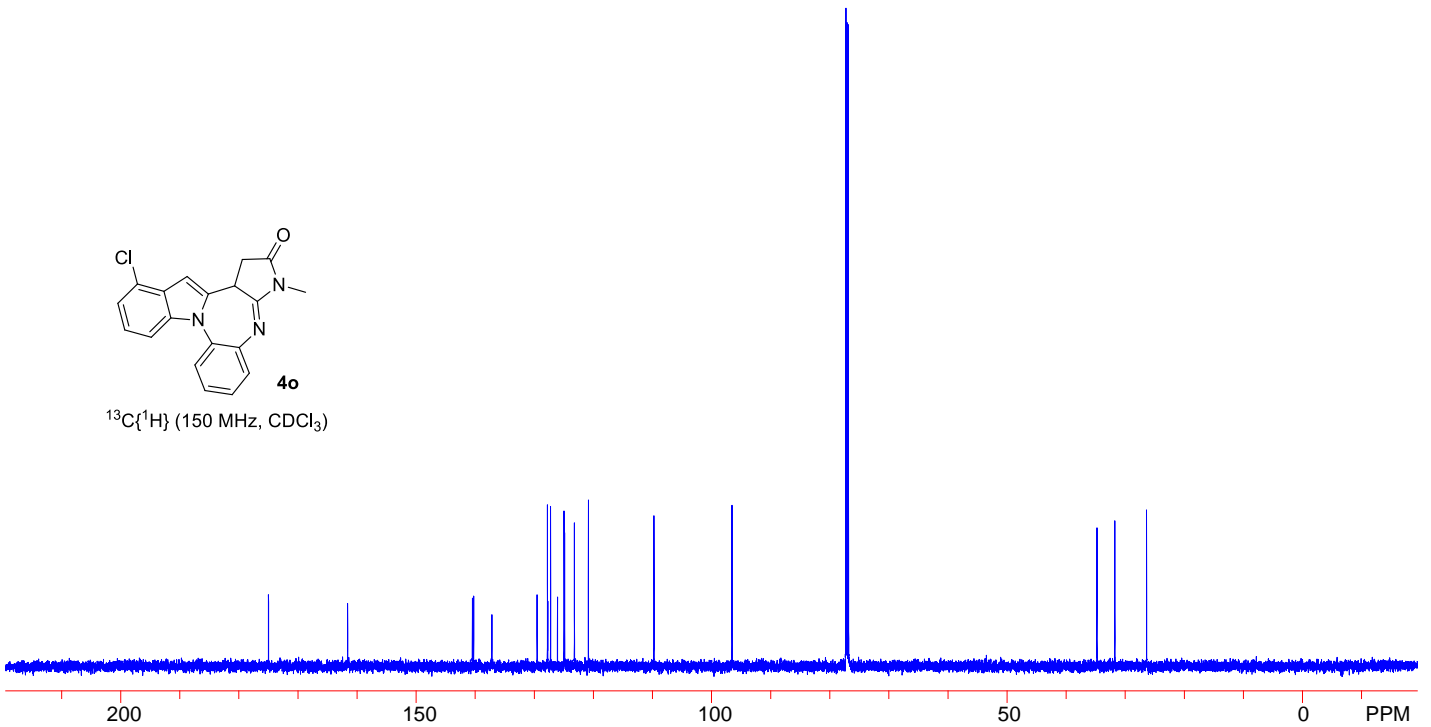

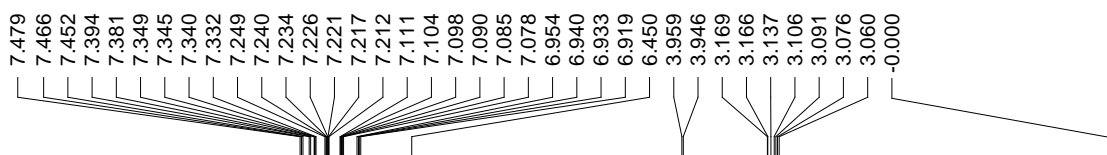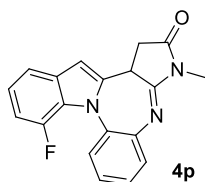

$^1\text{H NMR}$  (600 MHz,  $\text{CDCl}_3$ )

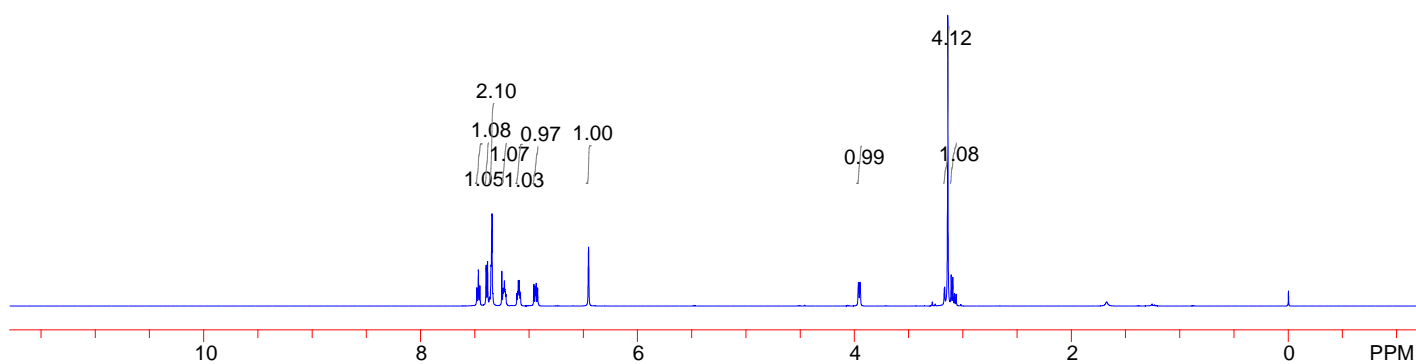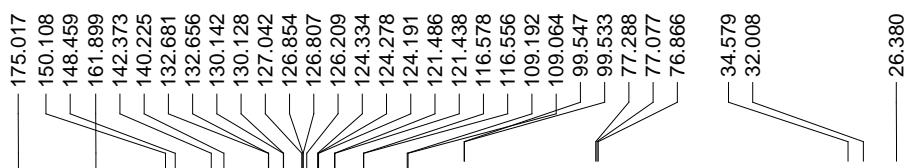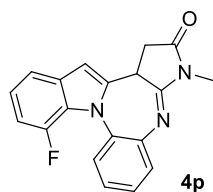

$^{13}\text{C}\{^1\text{H}\}$  (150 MHz,  $\text{CDCl}_3$ )

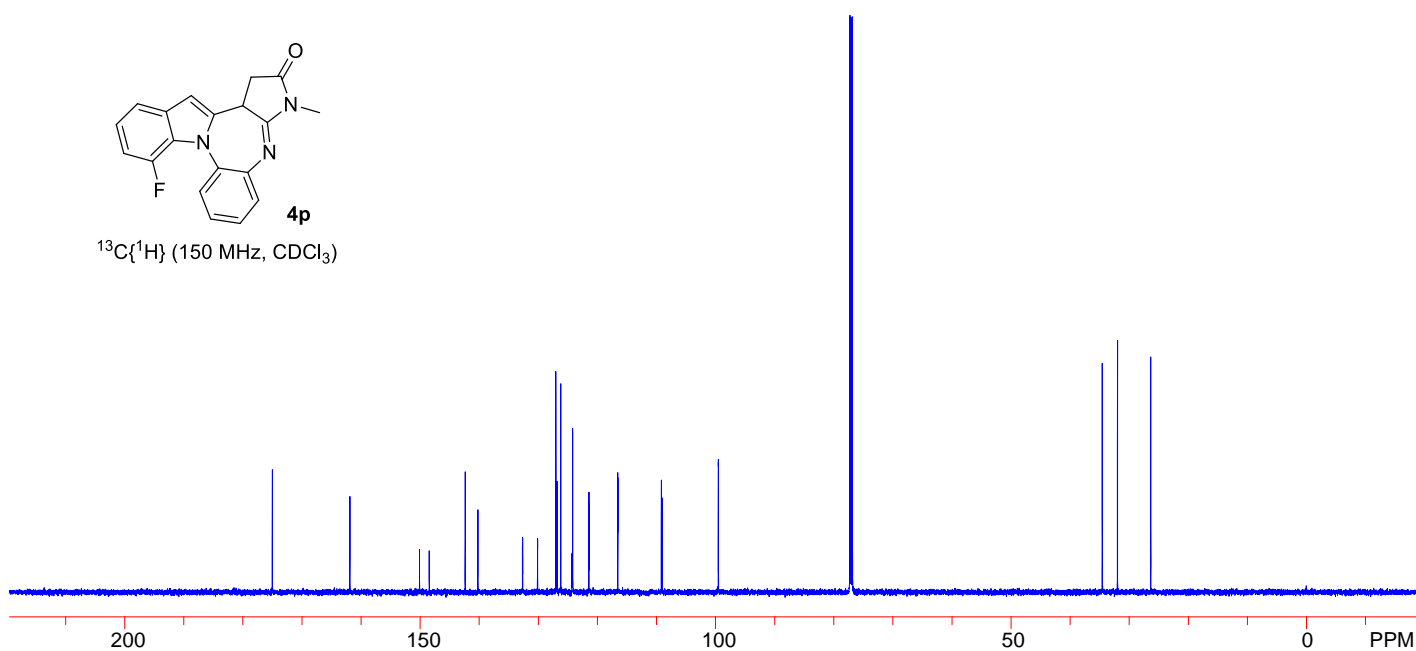

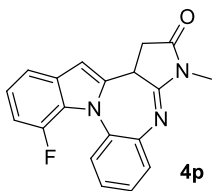

$^{19}\text{F}$  NMR (565 MHz,  $\text{CDCl}_3$ )

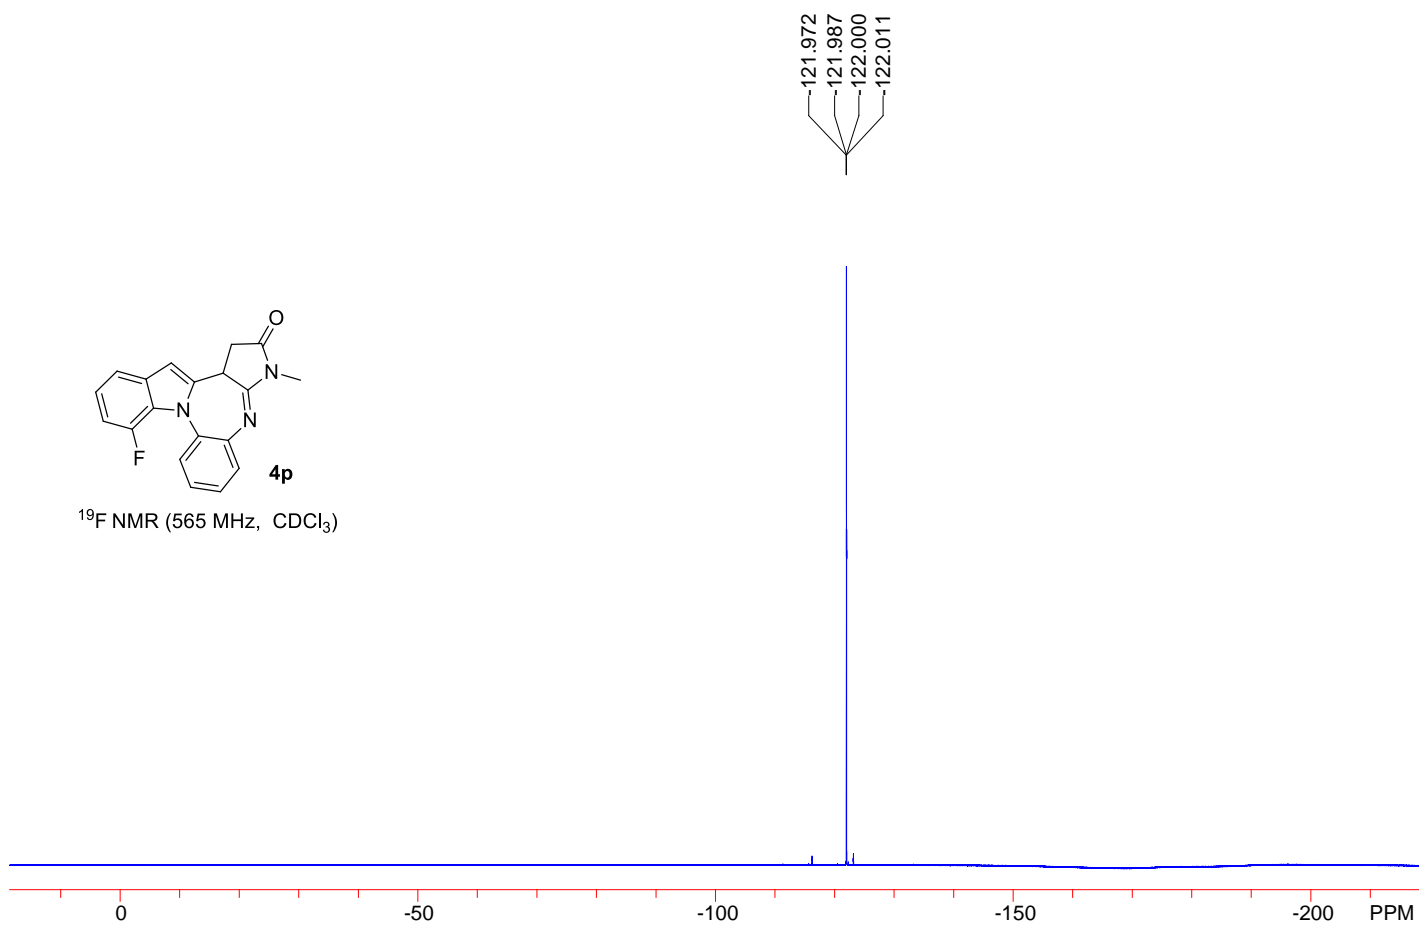

7.549  
7.547  
7.529  
7.527  
7.355  
7.352  
7.344  
7.337  
7.325  
7.296  
7.294  
7.275  
7.253  
7.238  
7.236  
7.219  
7.203  
7.196  
7.188  
7.181  
7.175  
7.168  
7.161  
7.134  
7.114  
7.095  
6.480  
6.477  
3.960  
3.956  
3.942  
3.939  
3.934  
3.176  
3.168  
3.147  
3.132  
3.124  
3.108  
3.086  
3.062  
3.041

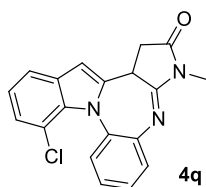

$^1\text{H NMR}$  (400 MHz,  $\text{CDCl}_3$ )

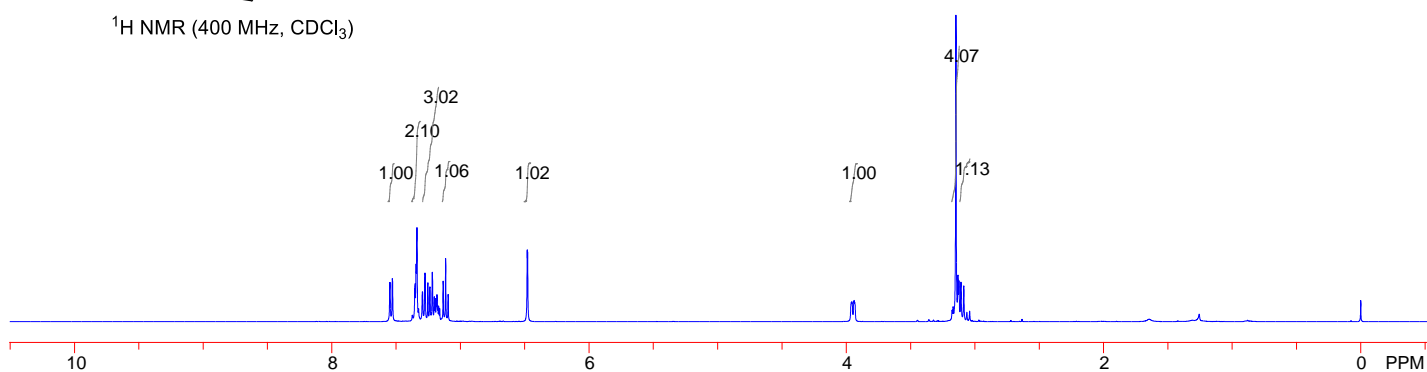

174.979  
162.469  
144.073  
141.034  
132.806  
131.875  
129.494  
128.952  
127.145  
125.573  
124.976  
123.343  
121.900  
119.429  
117.731  
99.879  
77.285  
77.073  
76.863  
34.714  
32.029  
26.386

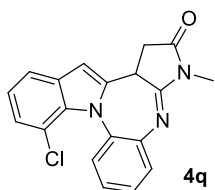

$^{13}\text{C}\{^1\text{H}\}$  (150 MHz,  $\text{CDCl}_3$ )

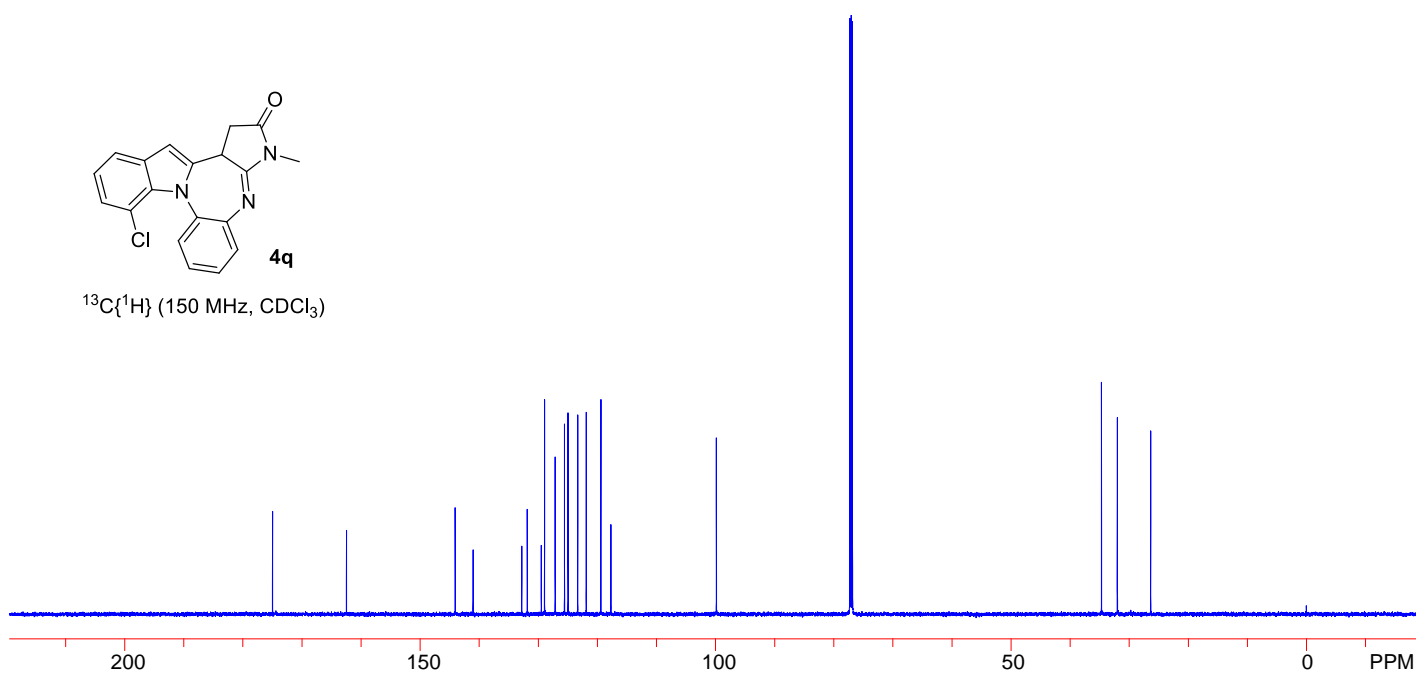

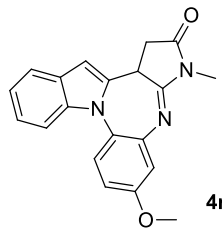

$^1\text{H NMR}$  (400 MHz,  $\text{CDCl}_3$ )

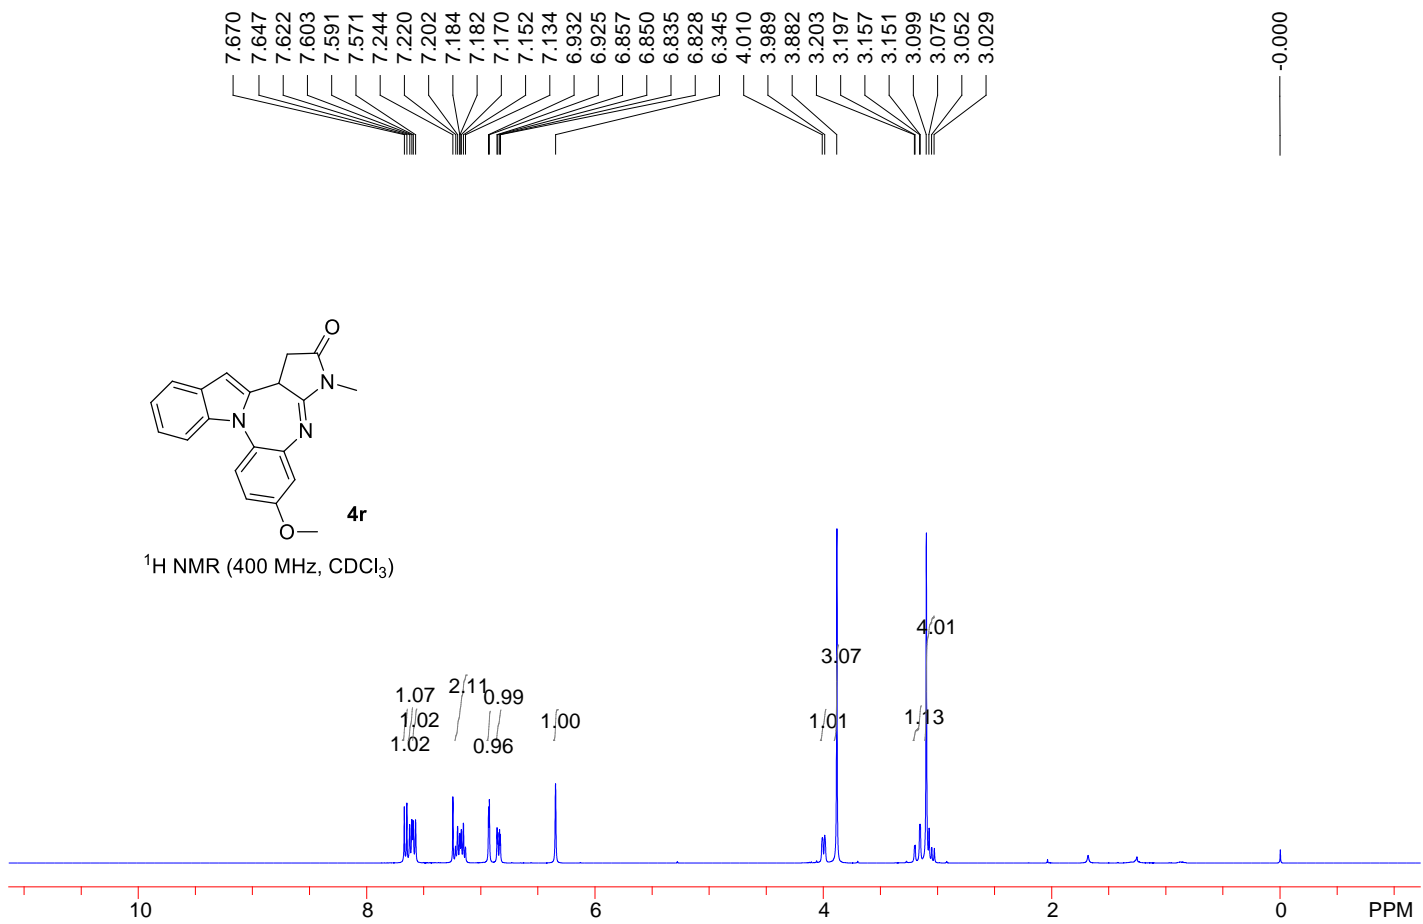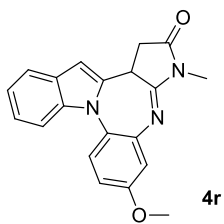

$^{13}\text{C}\{^1\text{H}\}$  (100 MHz,  $\text{CDCl}_3$ )

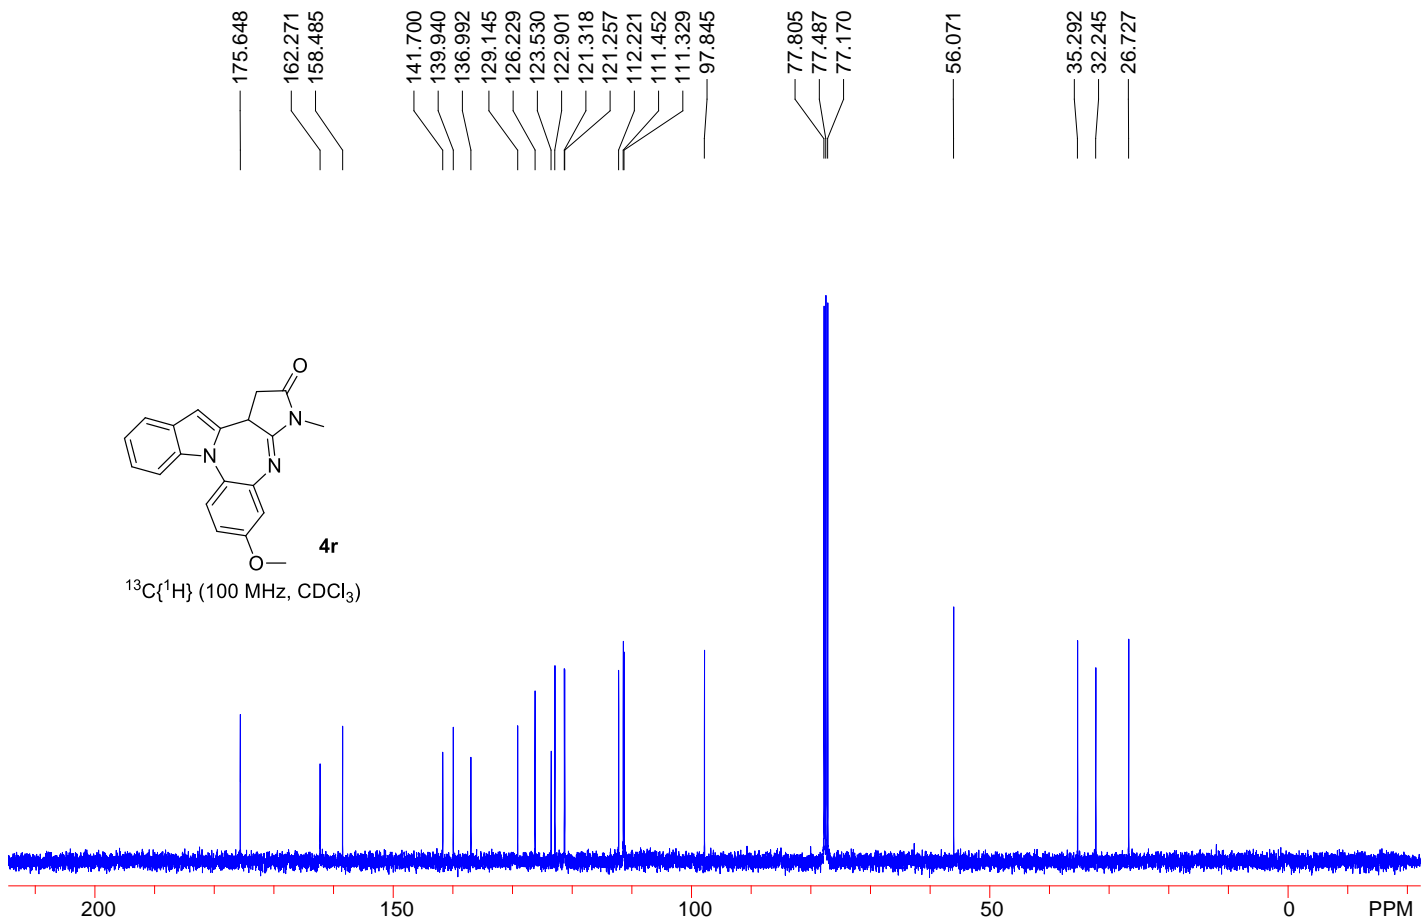

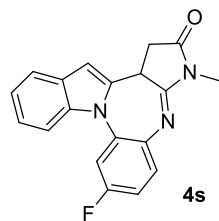

<sup>1</sup>H NMR (600 MHz, CDCl<sub>3</sub>)

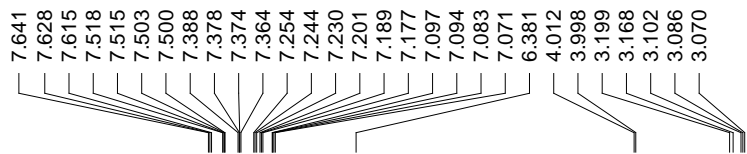

-0.000

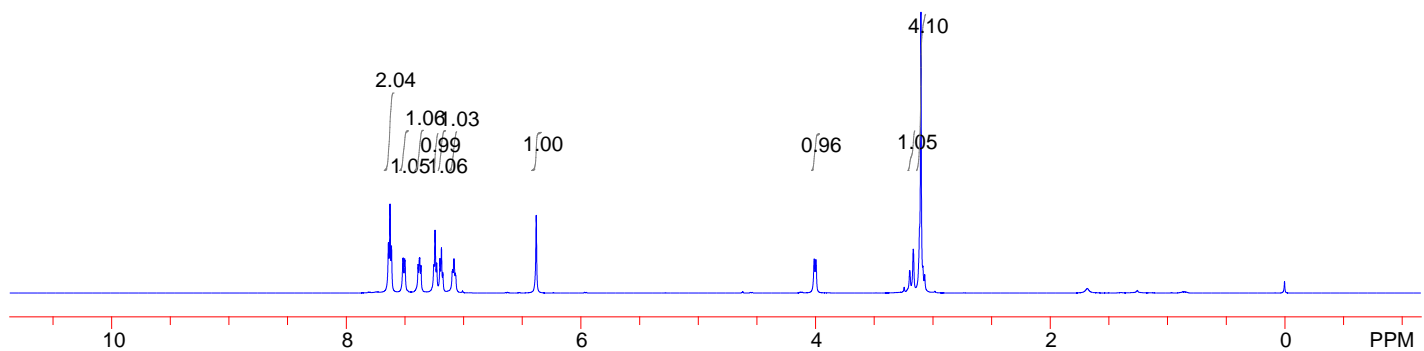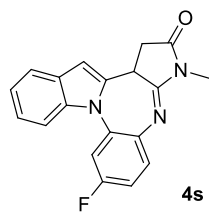

<sup>13</sup>C{<sup>1</sup>H} (150 MHz, CDCl<sub>3</sub>)

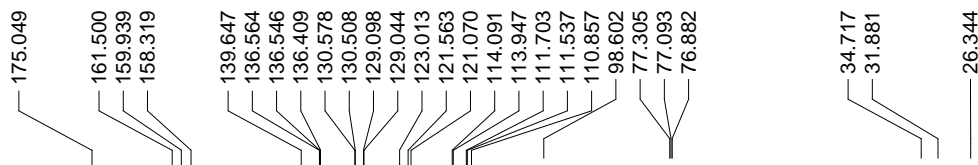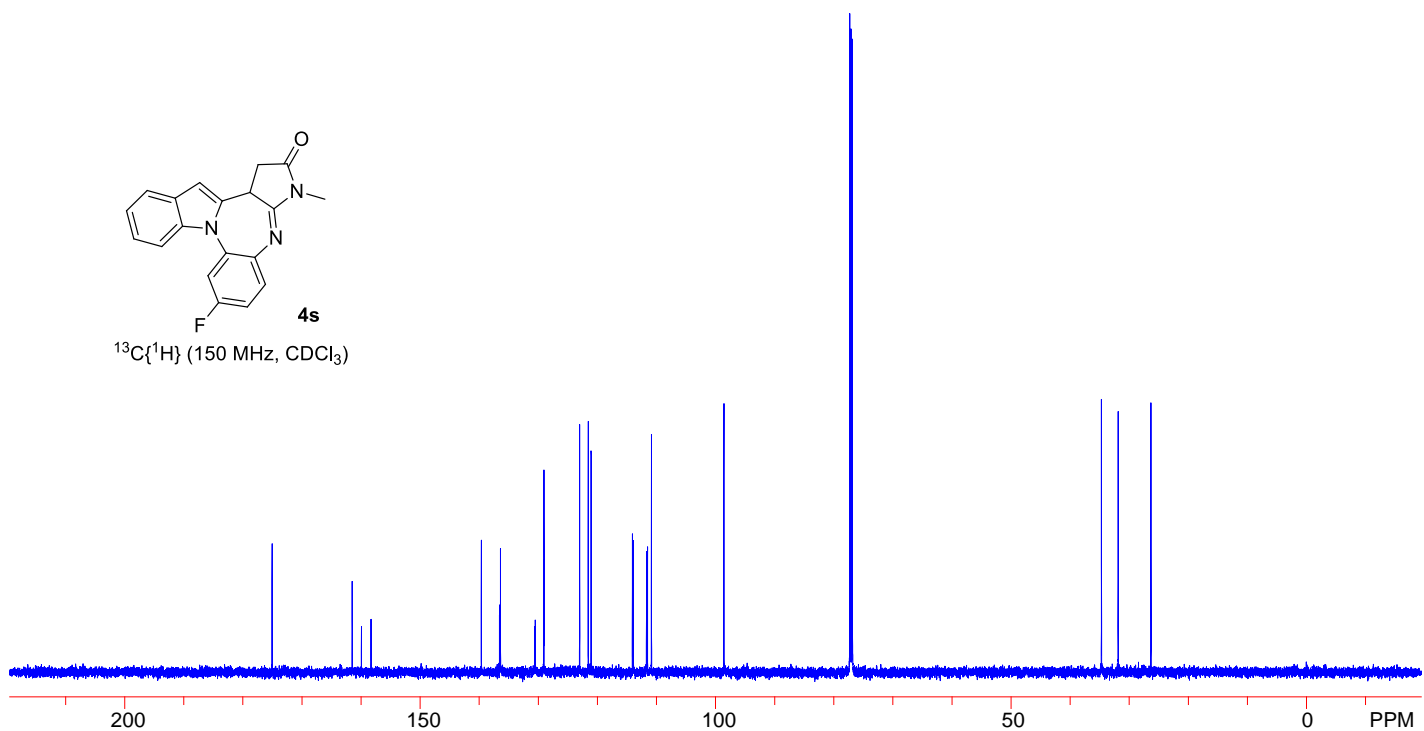



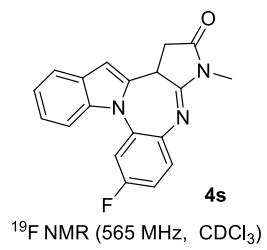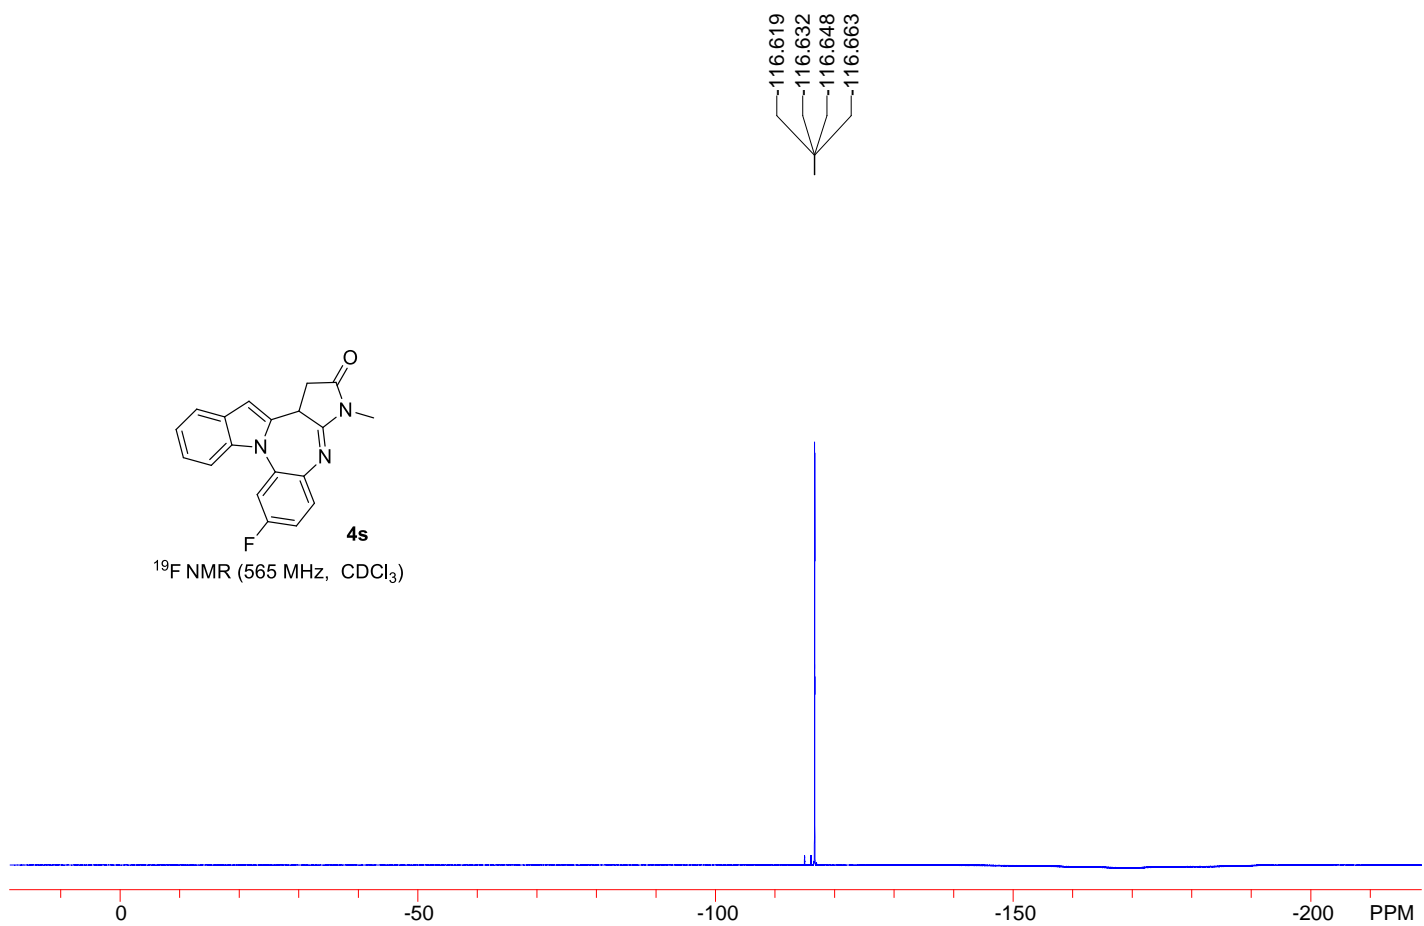

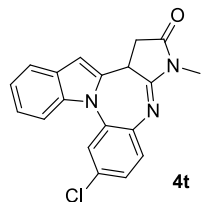

$^1\text{H NMR}$  (400 MHz,  $\text{CDCl}_3$ )

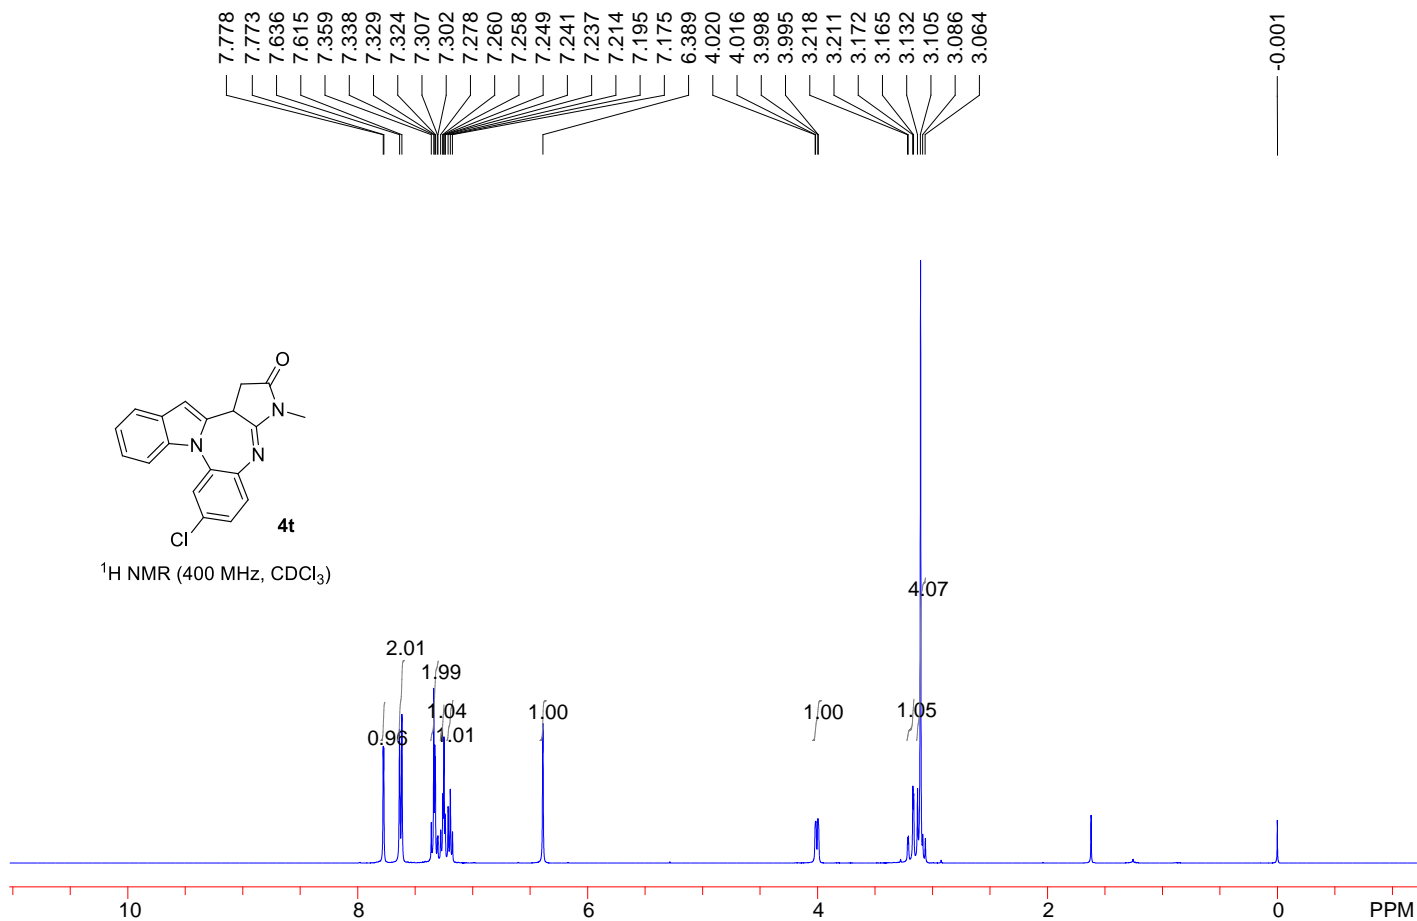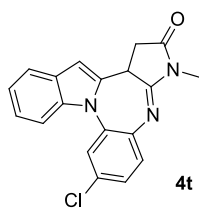

$^{13}\text{C}\{^1\text{H}\}$  (100 MHz,  $\text{CDCl}_3$ )

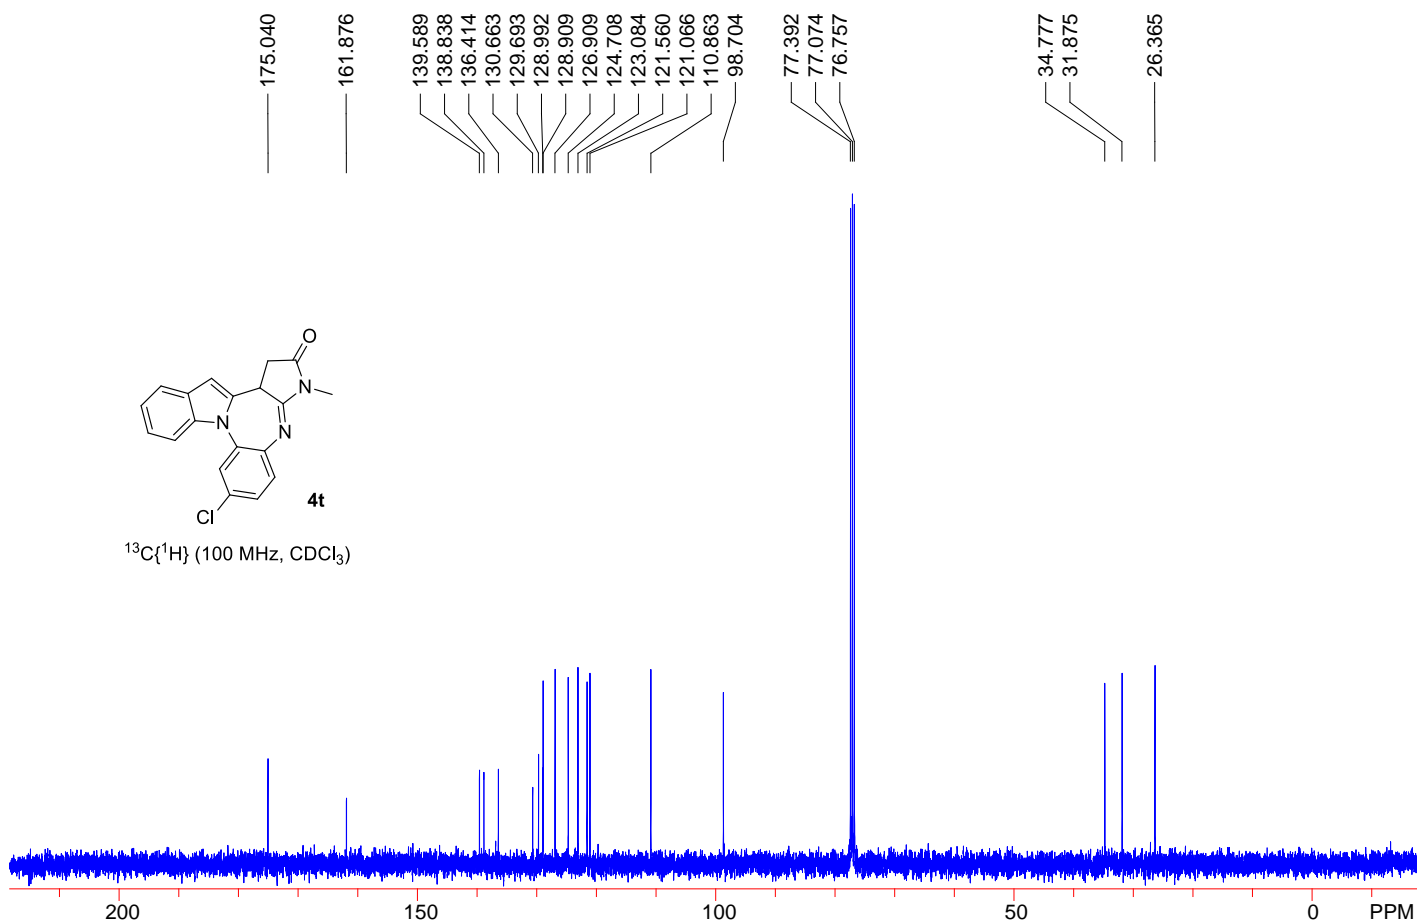

7.910  
7.620  
7.607  
7.458  
7.446  
7.282  
7.268  
7.251  
7.241  
7.198  
7.186  
7.175  
6.378

3.991  
3.977  
3.189  
3.159  
3.095  
3.059

-0.000

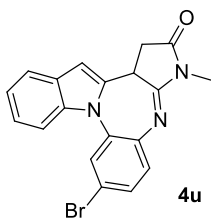

$^1\text{H NMR}$  (600 MHz,  $\text{CDCl}_3$ )

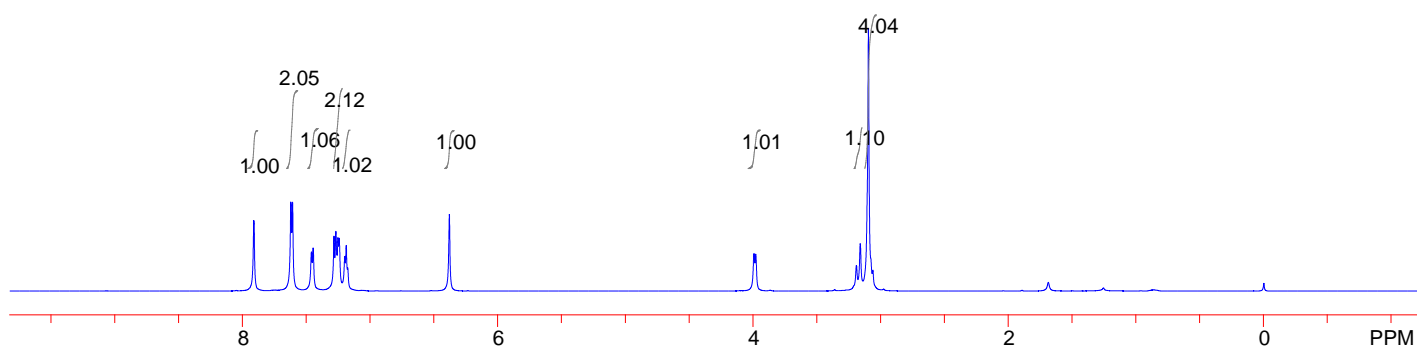

175.034  
161.924  
139.637  
139.317  
136.414  
130.963  
129.814  
129.210  
128.993  
127.616  
123.115  
121.580  
121.079  
117.133  
110.843  
98.746  
77.318  
77.106  
76.895  
34.794  
31.878  
26.374

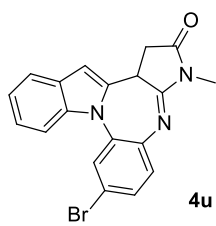

$^{13}\text{C}\{^1\text{H}\}$  (150 MHz,  $\text{CDCl}_3$ )

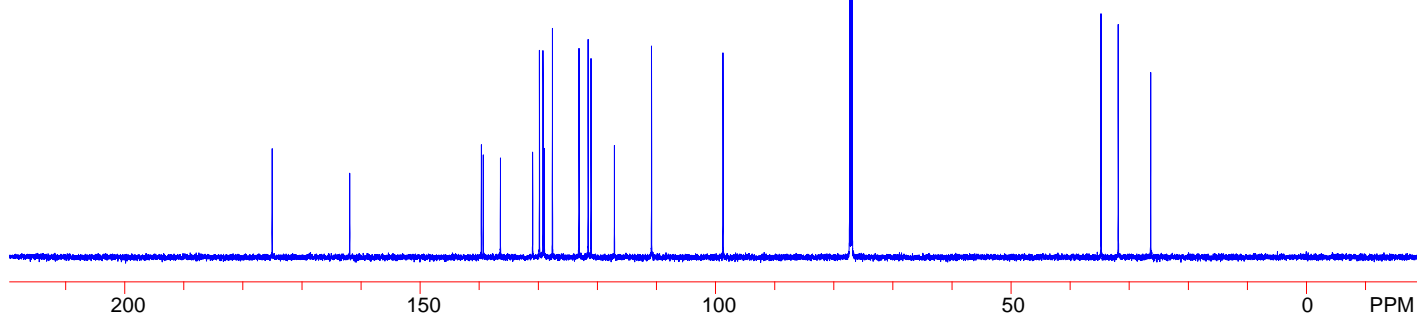

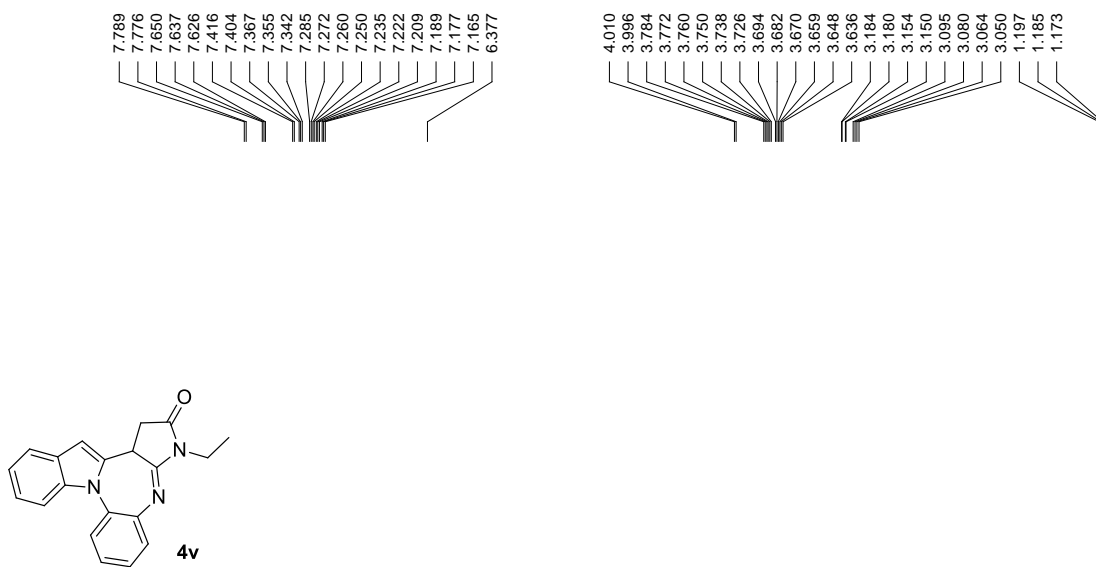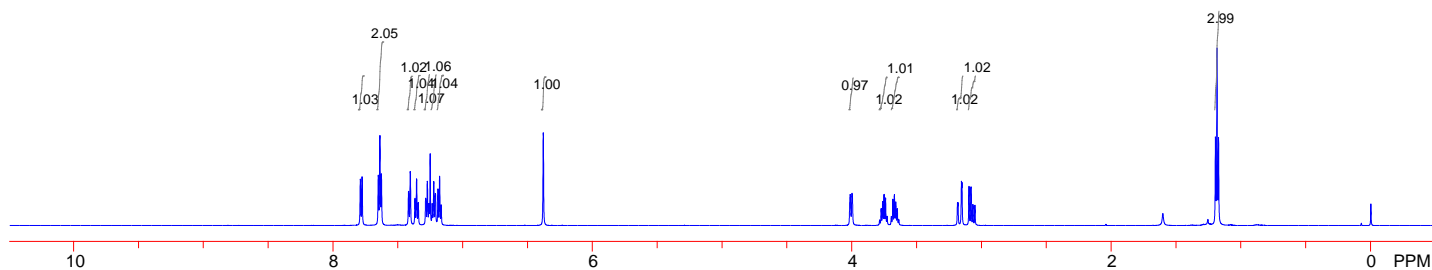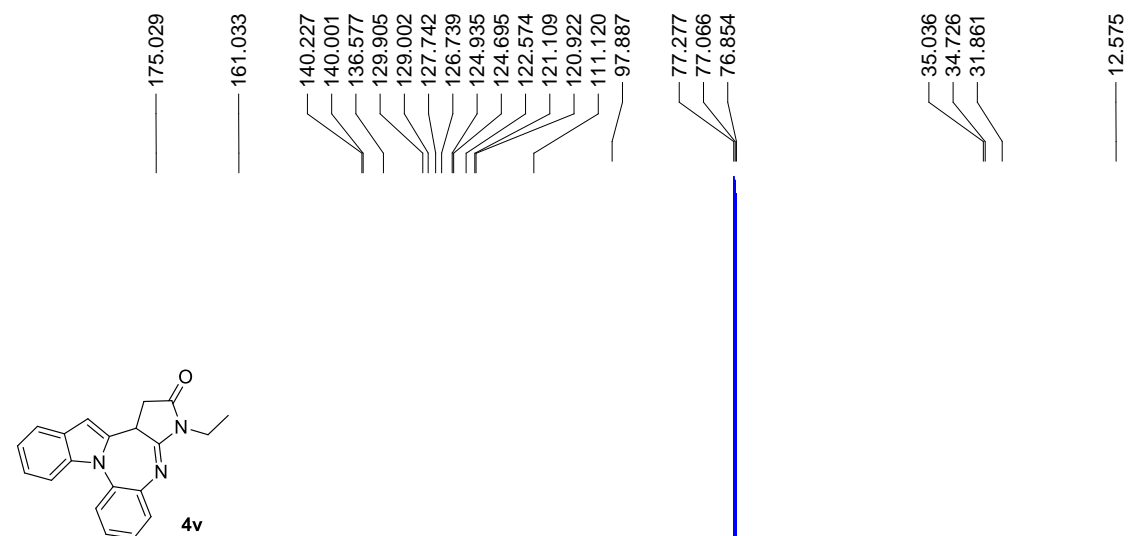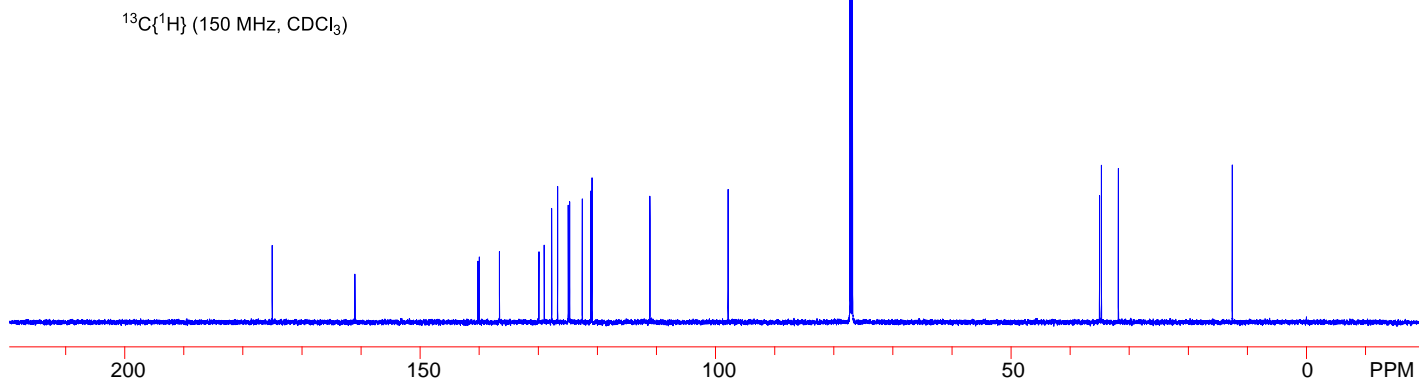

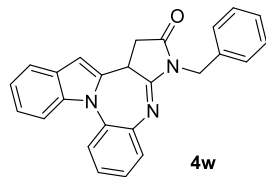

$^1\text{H NMR}$  (600 MHz,  $\text{CDCl}_3$ )

7.775  
7.762  
7.632  
7.618  
7.420  
7.407  
7.391  
7.352  
7.340  
7.326  
7.273  
7.261  
7.250  
7.238  
7.231  
7.220  
7.214  
7.201  
7.183  
7.170  
7.158  
6.381  
4.873  
4.850  
4.755  
4.731  
4.012  
3.998  
3.210  
3.206  
3.179  
3.176  
3.098  
3.083  
3.068  
3.052

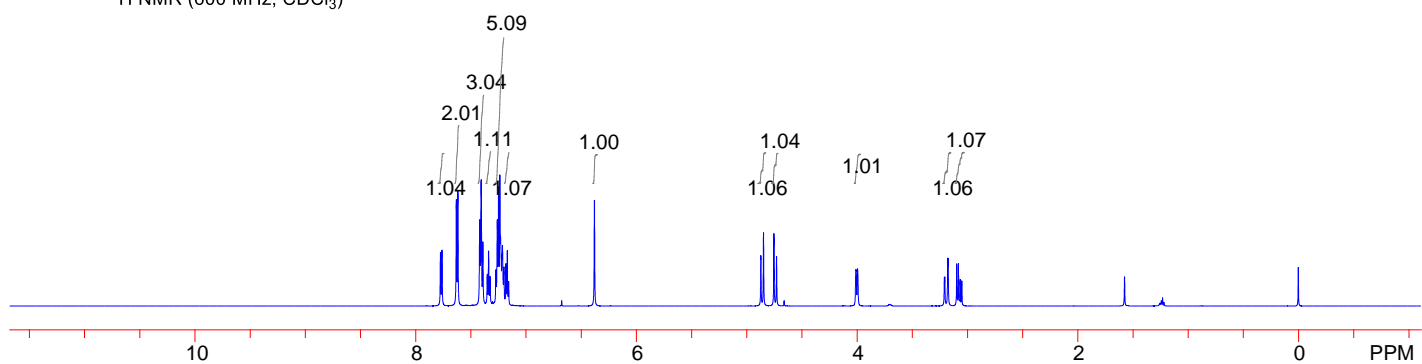

174.999  
160.828  
140.118  
139.930  
136.618  
136.007  
129.891  
128.975  
128.819  
128.500  
127.848  
127.742  
126.720  
124.936  
124.781  
122.624  
121.140  
120.938  
111.110  
98.082  
77.288  
77.076  
76.857  
43.484  
34.815  
31.906

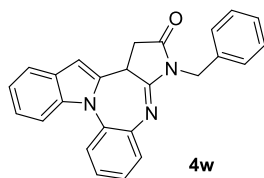

$^{13}\text{C}\{^1\text{H}\}$  (150 MHz,  $\text{CDCl}_3$ )

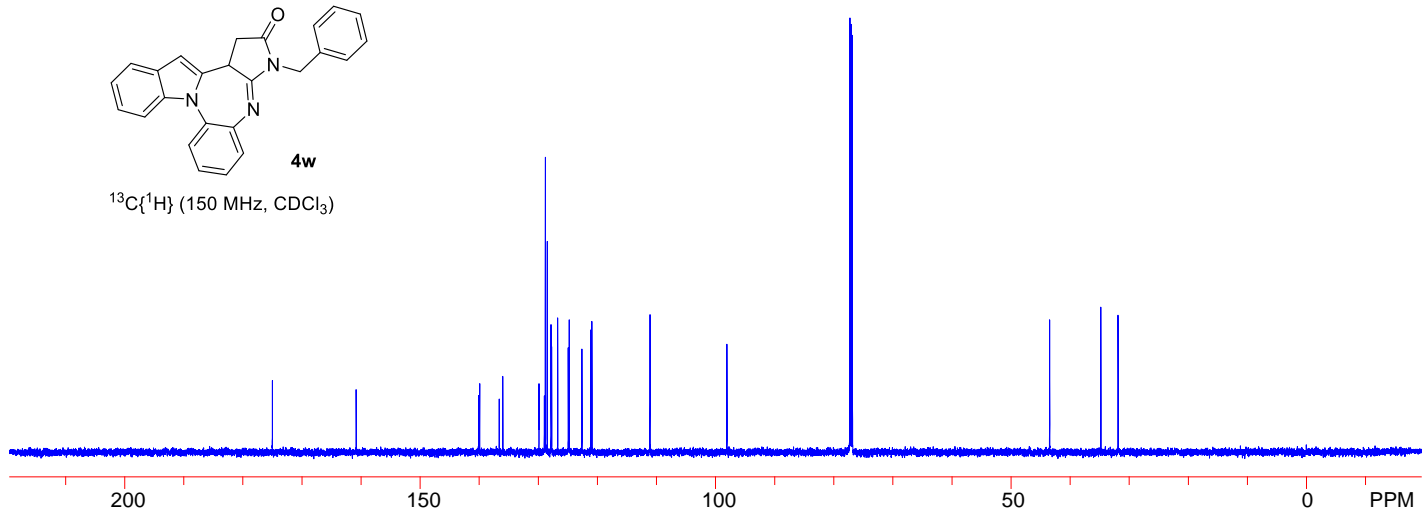

7.790  
7.771  
7.649  
7.641  
7.628  
7.624  
7.406  
7.402  
7.386  
7.382  
7.367  
7.364  
7.348  
7.347  
7.329  
7.285  
7.281  
7.265  
7.249  
7.220  
7.202  
7.199  
7.192  
7.173  
7.155  
6.384  
4.013  
3.994  
3.553  
3.534  
3.520  
3.502  
3.463  
3.444  
3.430  
3.411  
3.215  
3.209  
3.169  
3.163  
3.119  
3.096  
3.073  
3.050  
2.190  
2.172  
2.155  
2.138  
2.121  
2.103  
2.086  
0.836  
0.817  
0.798

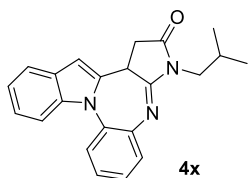

$^1\text{H NMR}$  (400 MHz,  $\text{CDCl}_3$ )

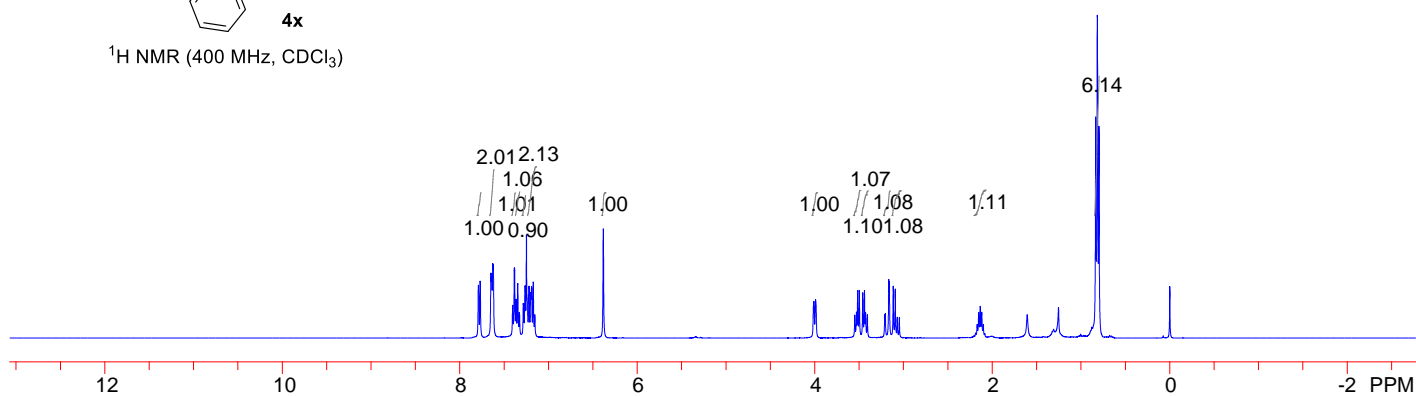

175.508  
161.567  
140.302  
140.095  
136.537  
129.842  
129.007  
127.682  
126.702  
124.878  
124.631  
122.528  
121.051  
120.946  
111.077  
97.685  
77.384  
77.269  
77.065  
76.747  
47.074  
34.608  
31.708  
26.480  
20.054  
20.013

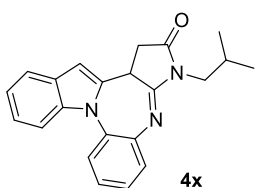

$^{13}\text{C}\{^1\text{H}\}$  (100 MHz,  $\text{CDCl}_3$ )

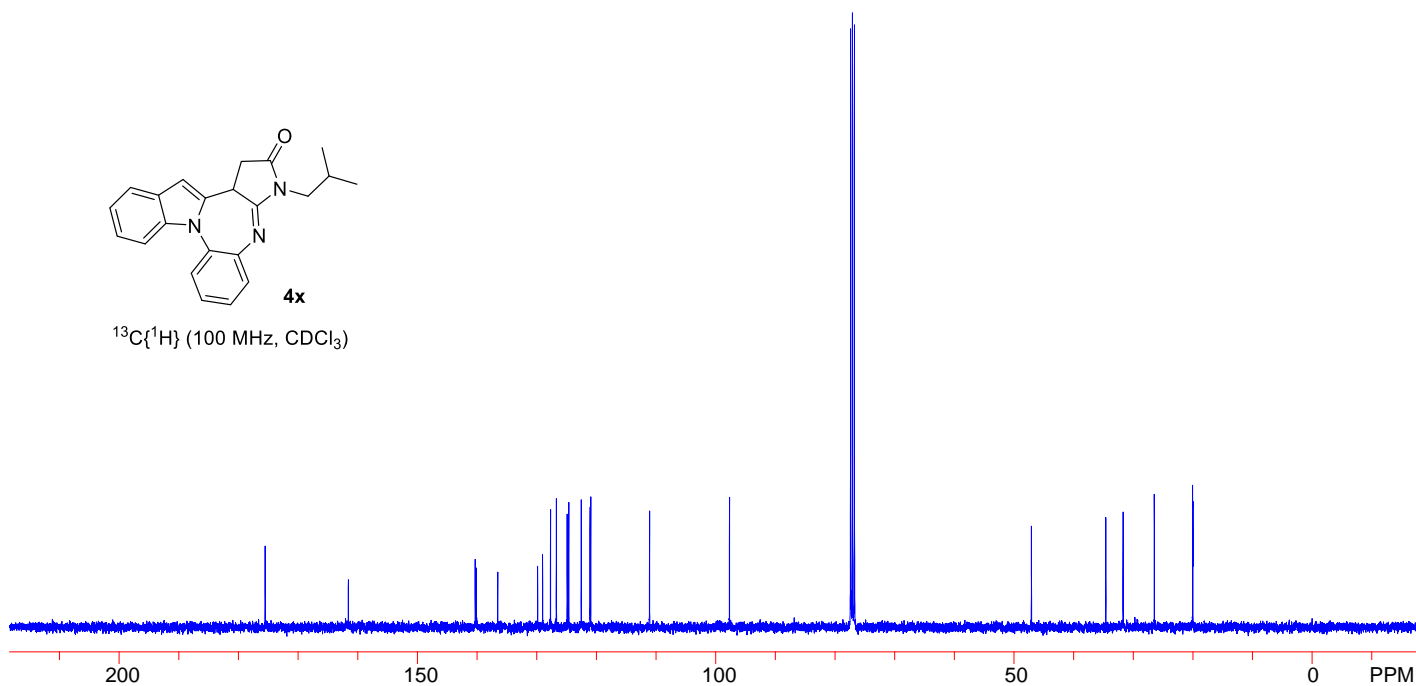

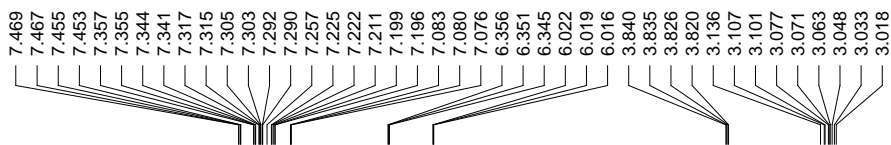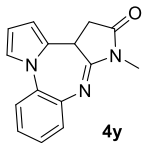

<sup>1</sup>H NMR (600 MHz, CDCl<sub>3</sub>)

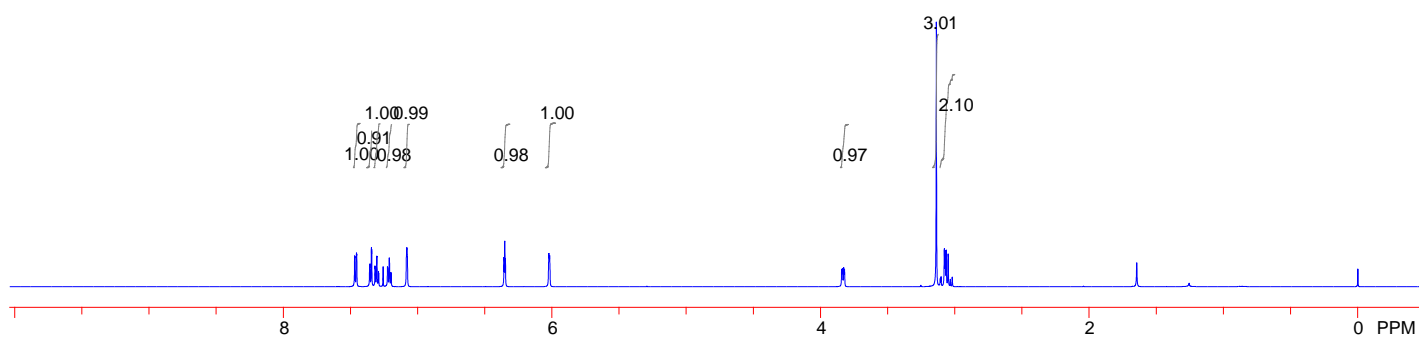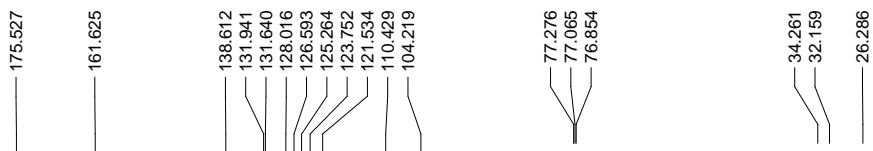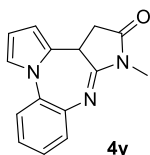

<sup>13</sup>C NMR (150 MHz, CDCl<sub>3</sub>)

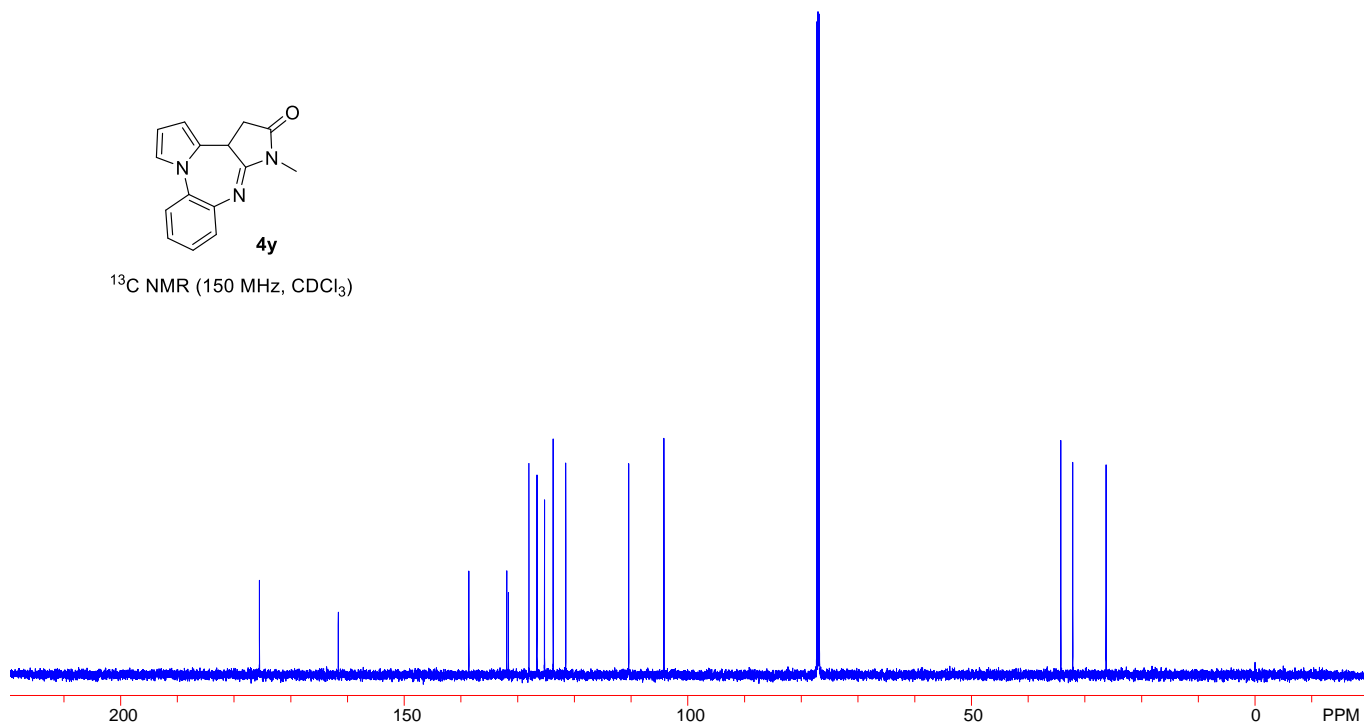

## VII. NMR spectra of 5a-5f

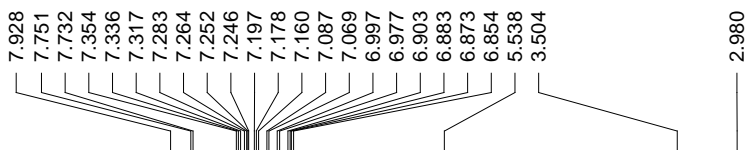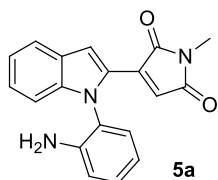

<sup>1</sup>H NMR (400 MHz, CDCl<sub>3</sub>)

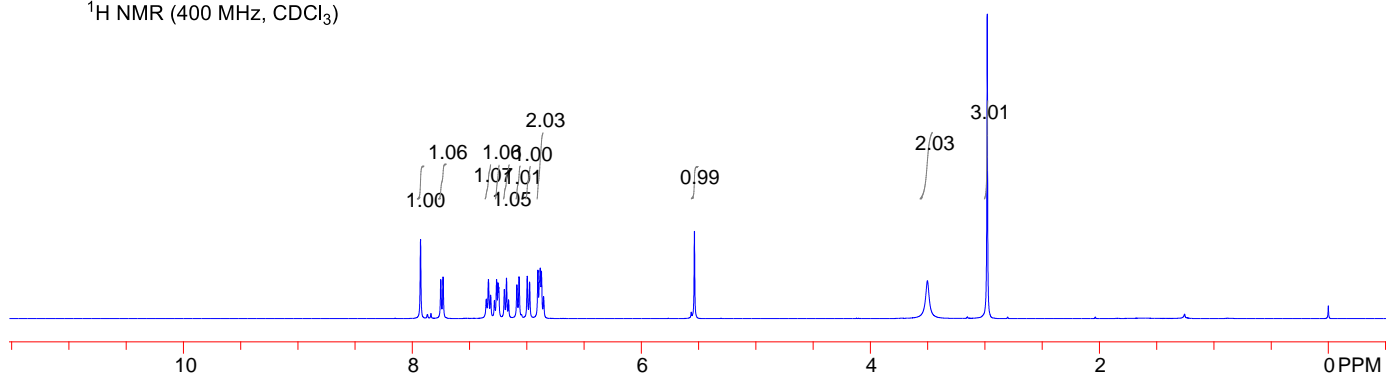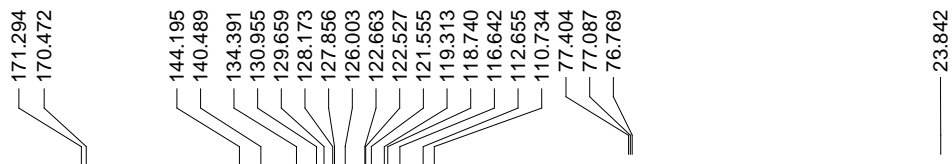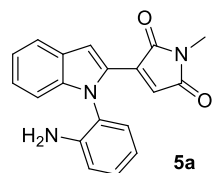

<sup>13</sup>C{<sup>1</sup>H} (100 MHz, CDCl<sub>3</sub>)

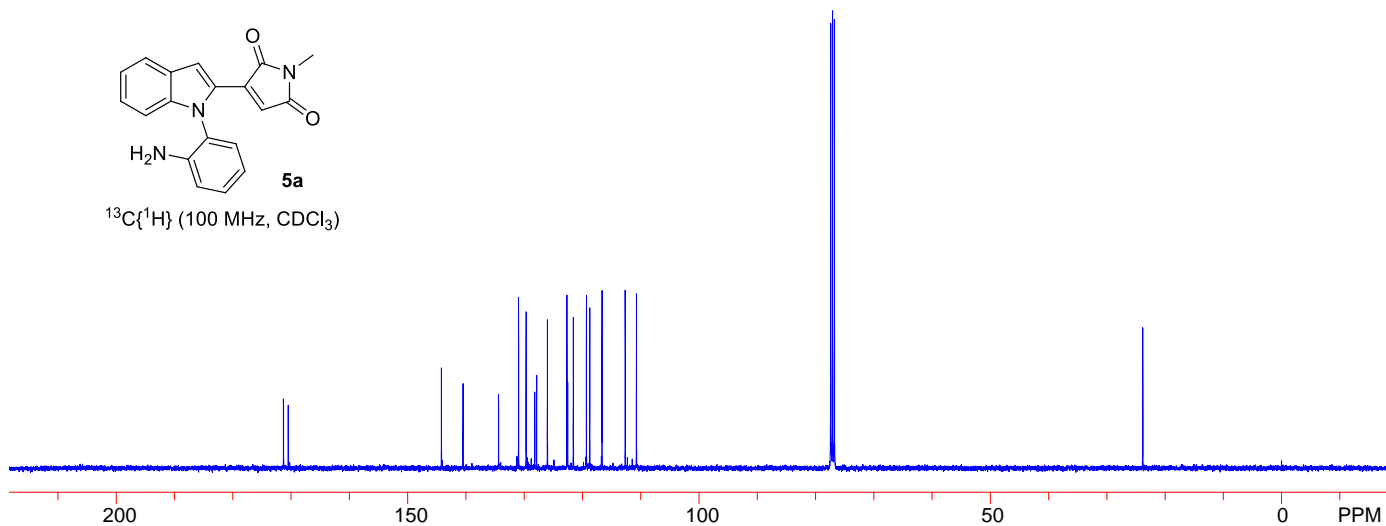



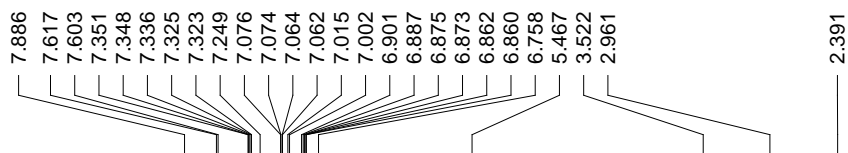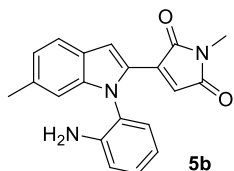

$^1\text{H NMR}$  (600 MHz,  $\text{CDCl}_3$ )

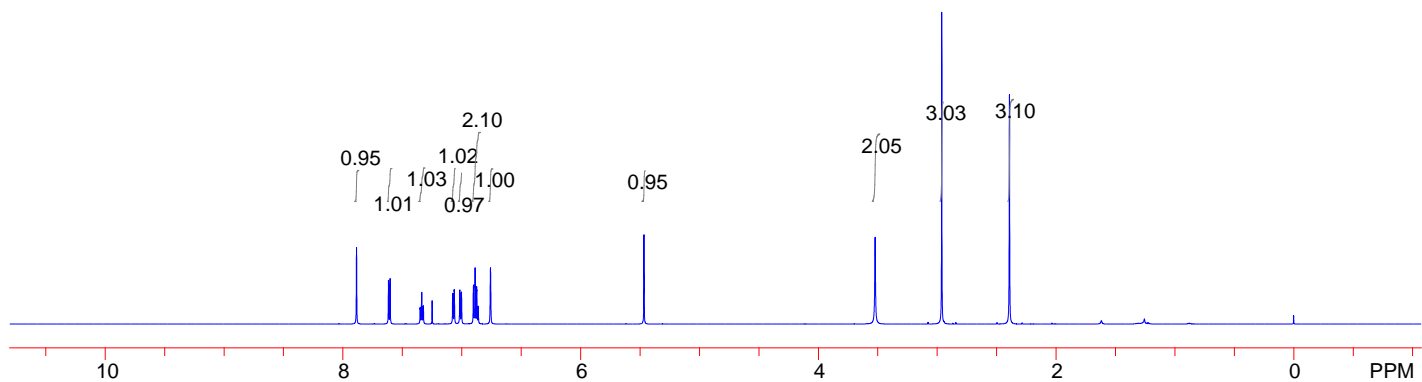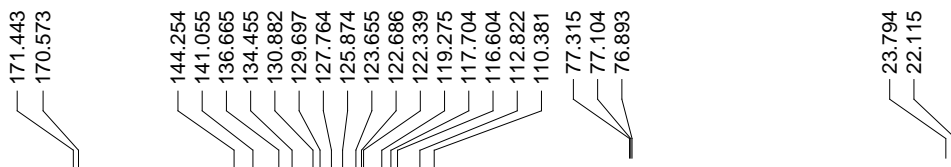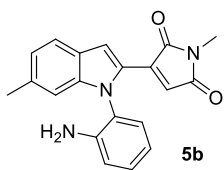

$^{13}\text{C}\{^1\text{H}\}$  (150 MHz,  $\text{CDCl}_3$ )

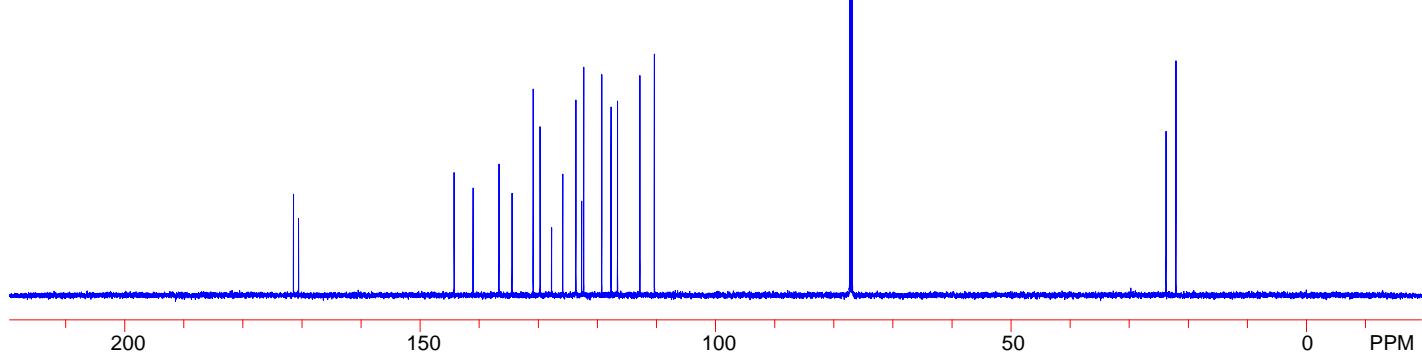

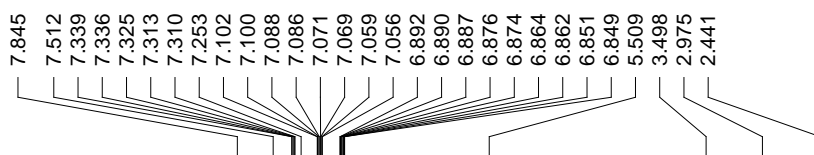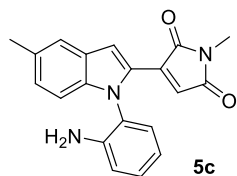

$^1\text{H NMR}$  (600 MHz,  $\text{CDCl}_3$ )

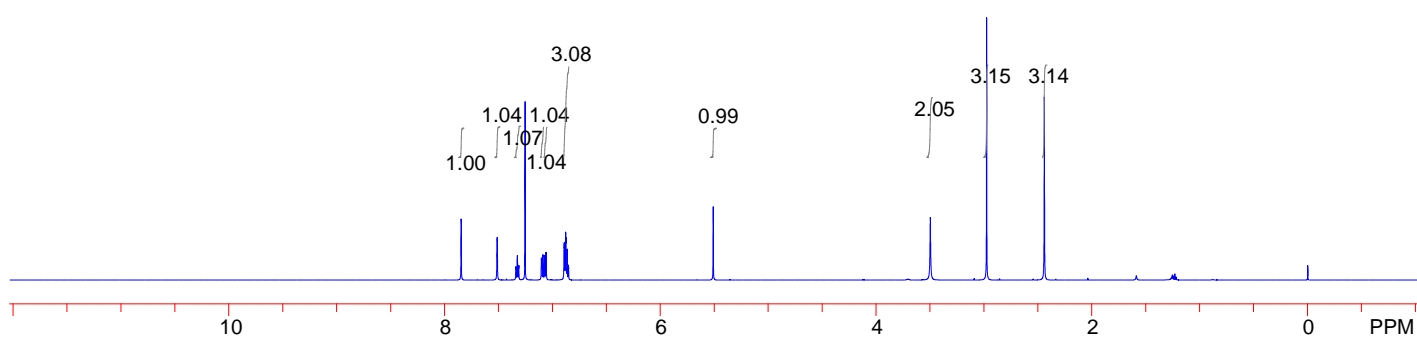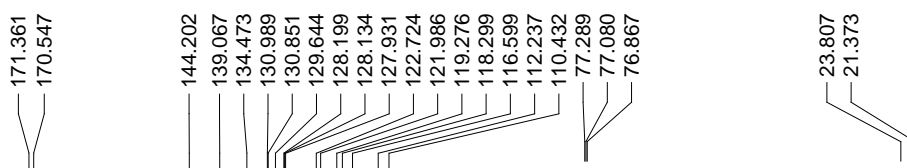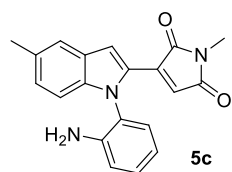

$^{13}\text{C}\{^1\text{H}\}$  (150 MHz,  $\text{CDCl}_3$ )

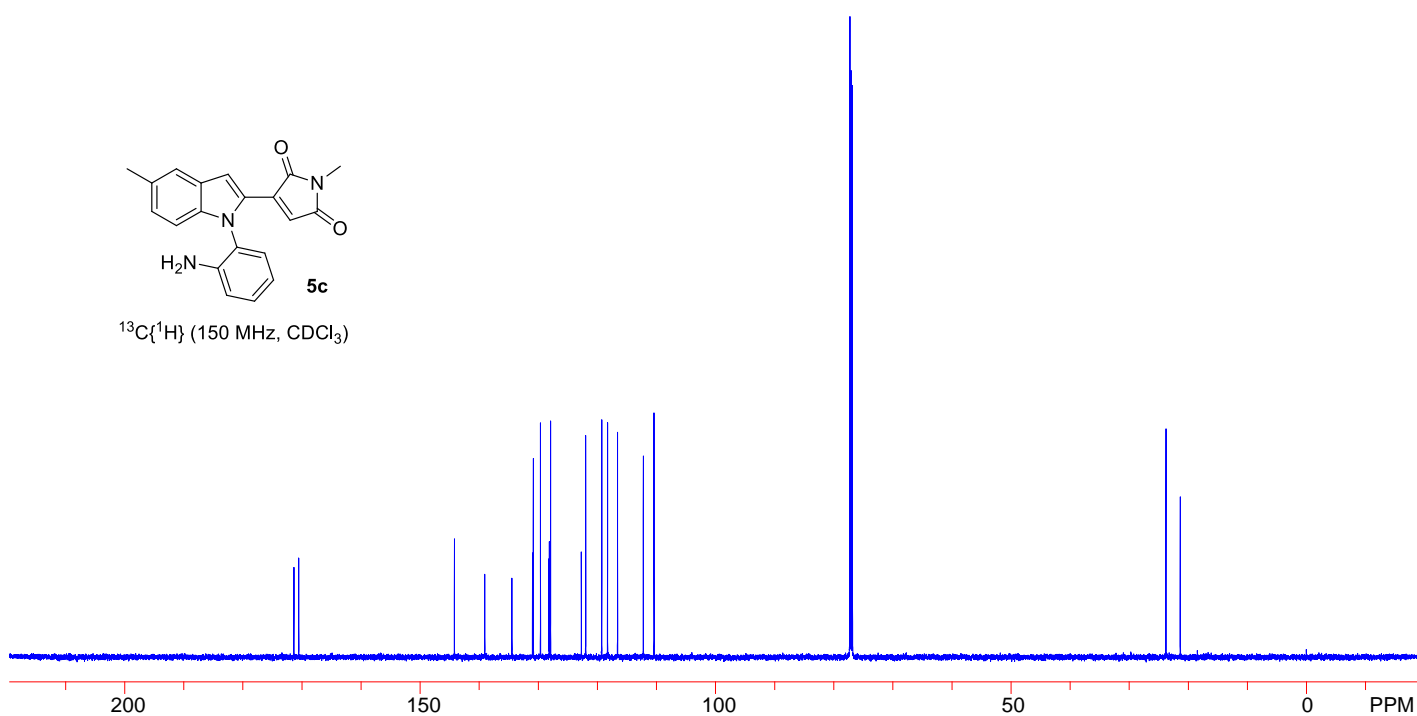

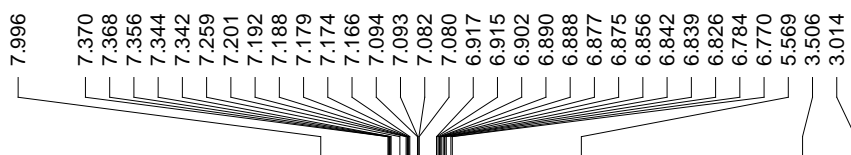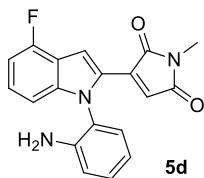

$^1\text{H NMR}$  (600 MHz,  $\text{CDCl}_3$ )

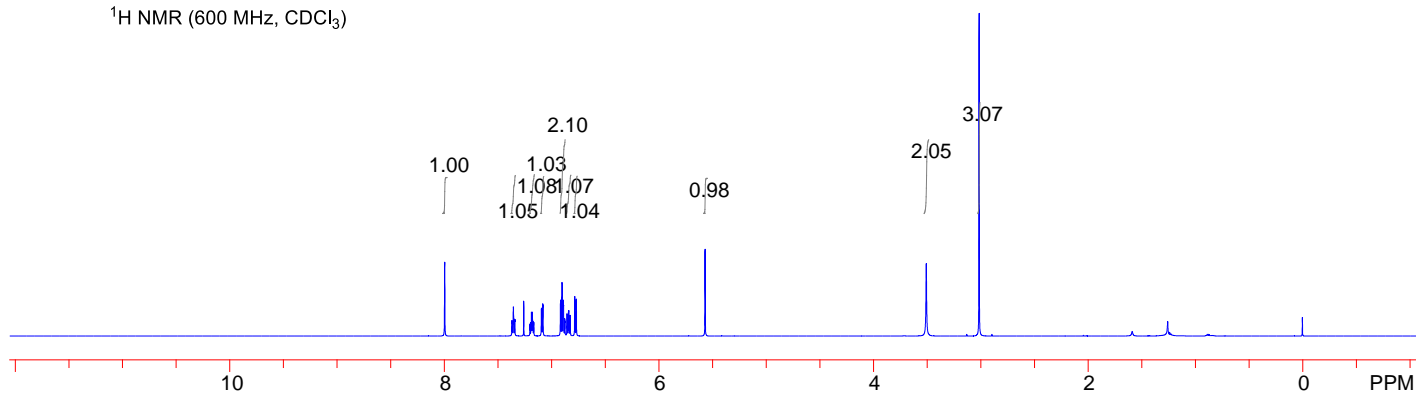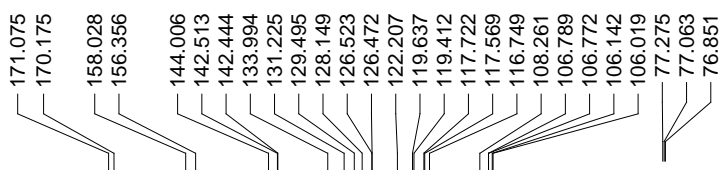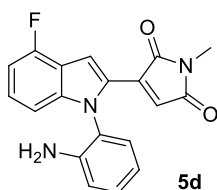

$^{13}\text{C}\{^1\text{H}\}$  (150 MHz,  $\text{CDCl}_3$ )

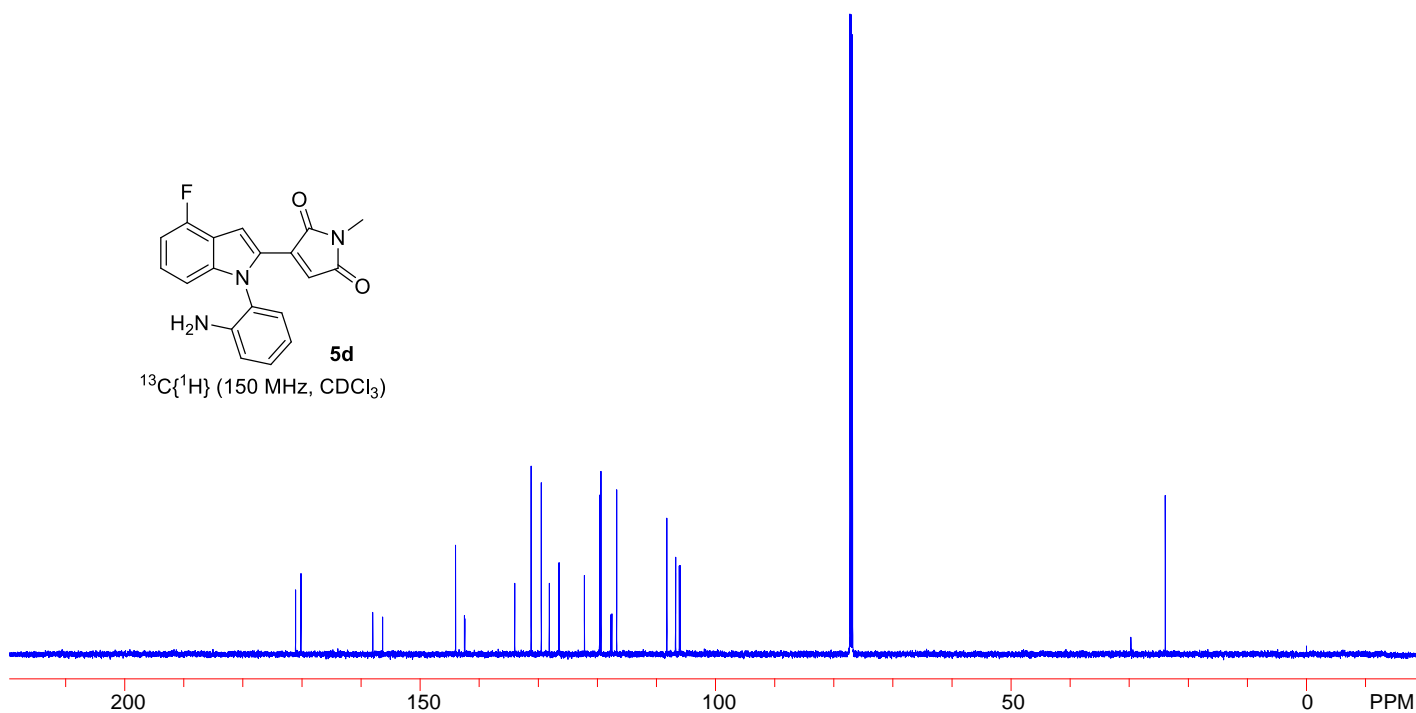

119.457  
119.469  
119.475  
119.483

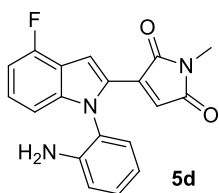

<sup>19</sup>F NMR (565 MHz, CDCl<sub>3</sub>)

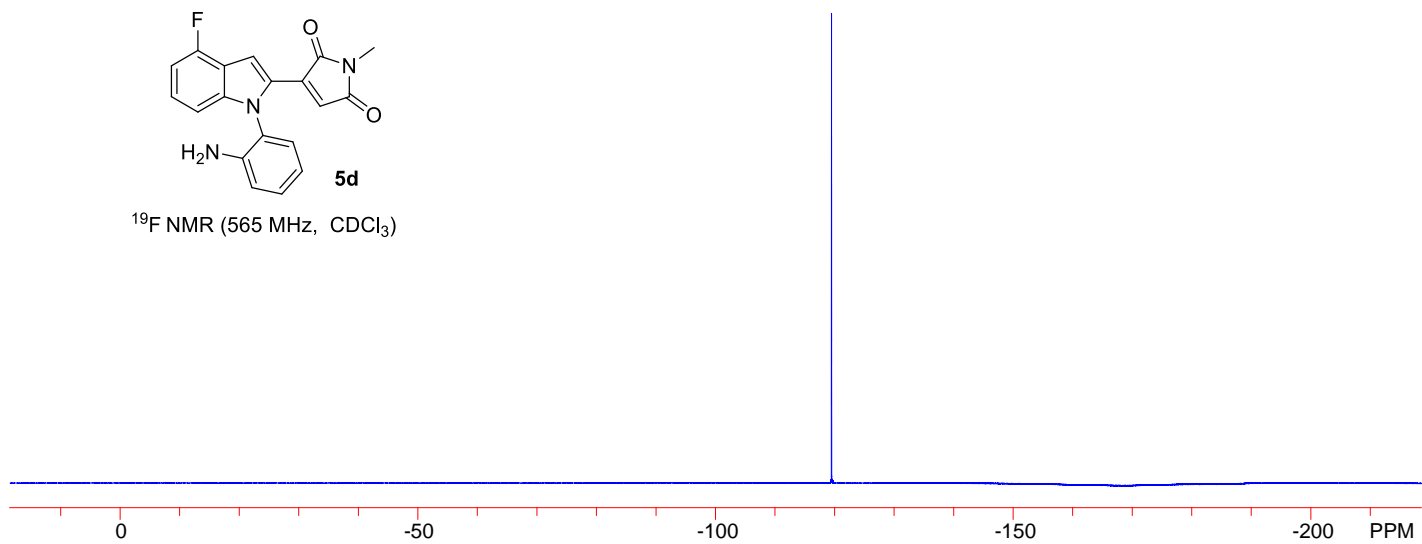

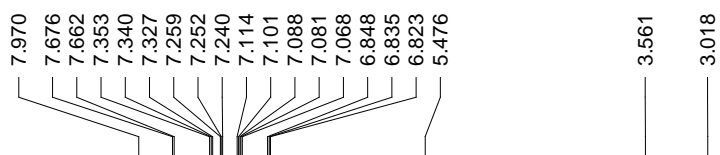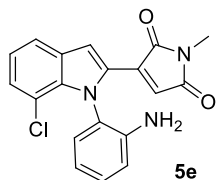

$^1\text{H NMR}$  (600 MHz,  $\text{CDCl}_3$ )

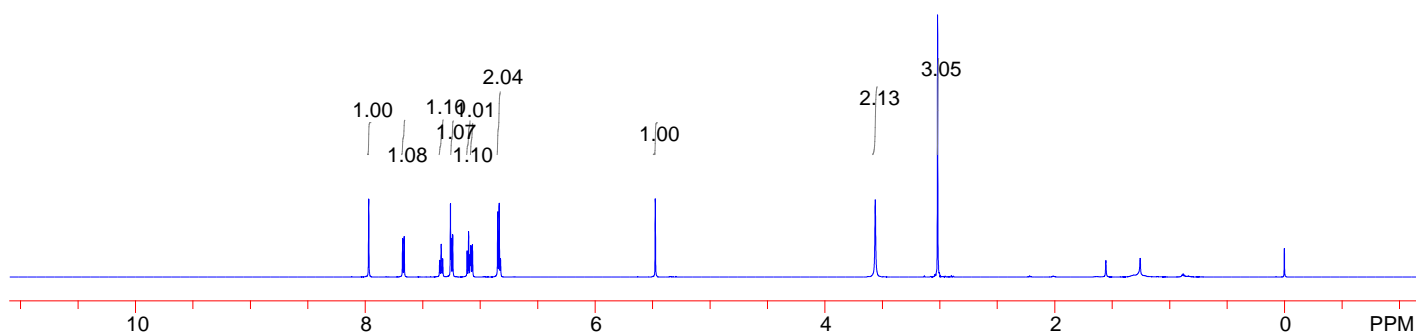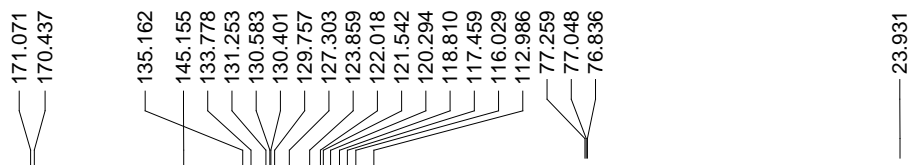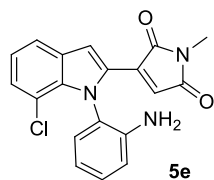

$^{13}\text{C}\{^1\text{H}\}$  (150 MHz,  $\text{CDCl}_3$ )

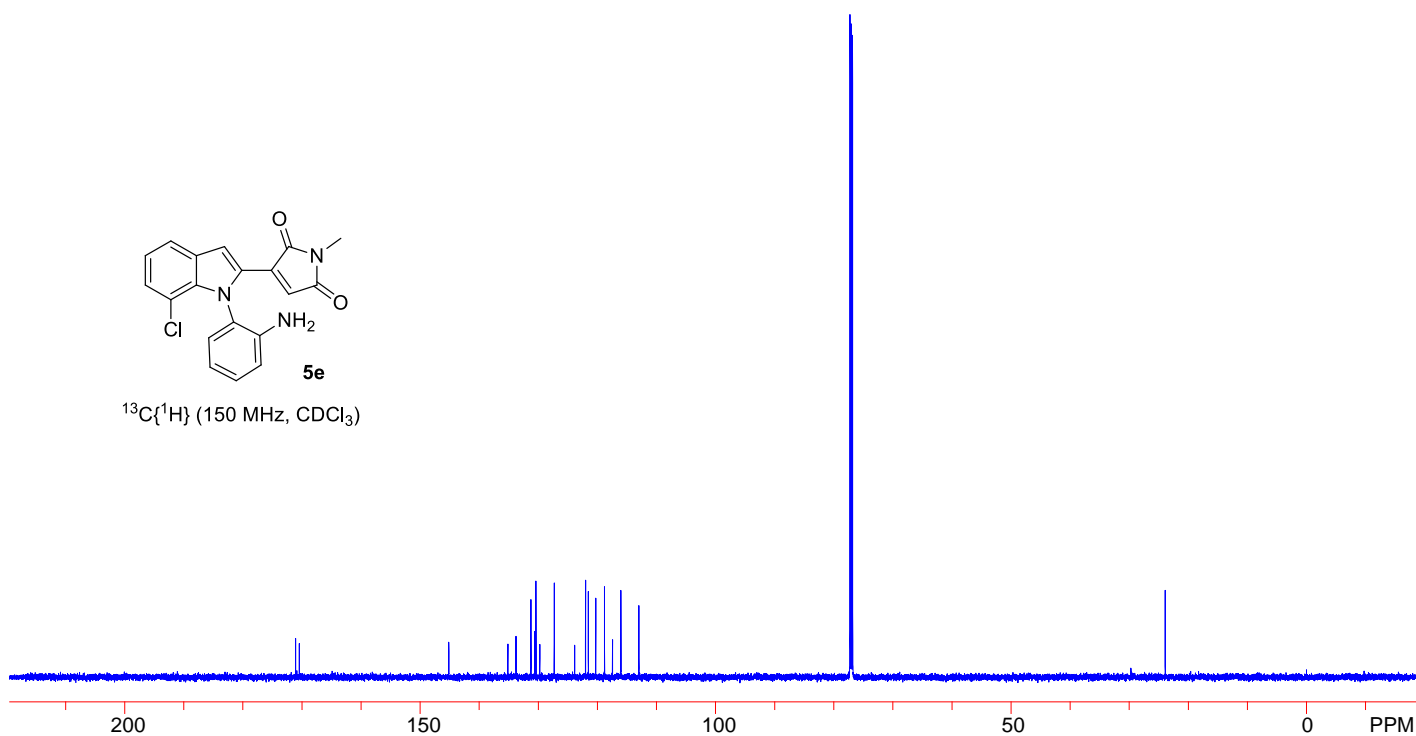

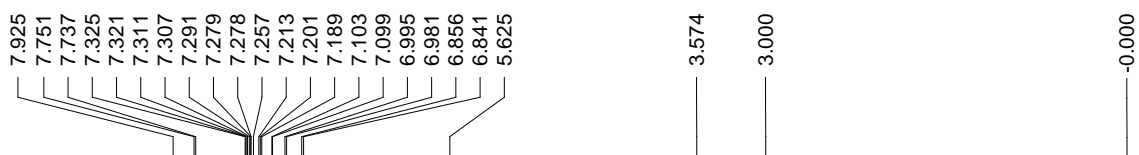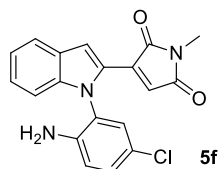

$^1\text{H NMR}$  (600 MHz,  $\text{CDCl}_3$ )

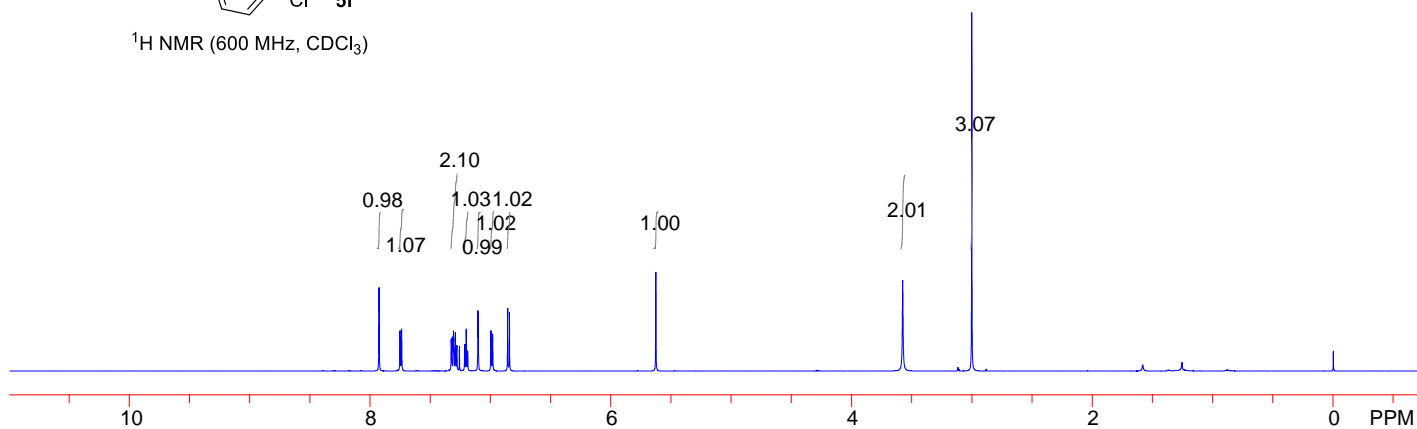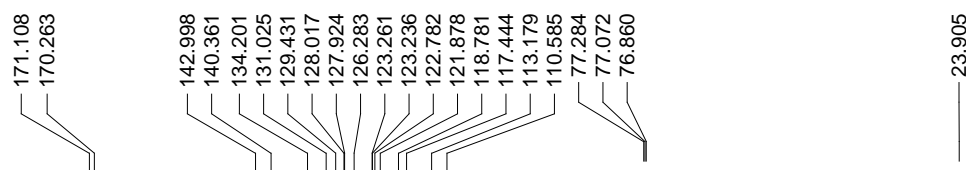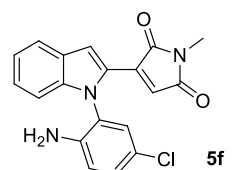

$^{13}\text{C}\{^1\text{H}\}$  (150 MHz,  $\text{CDCl}_3$ )

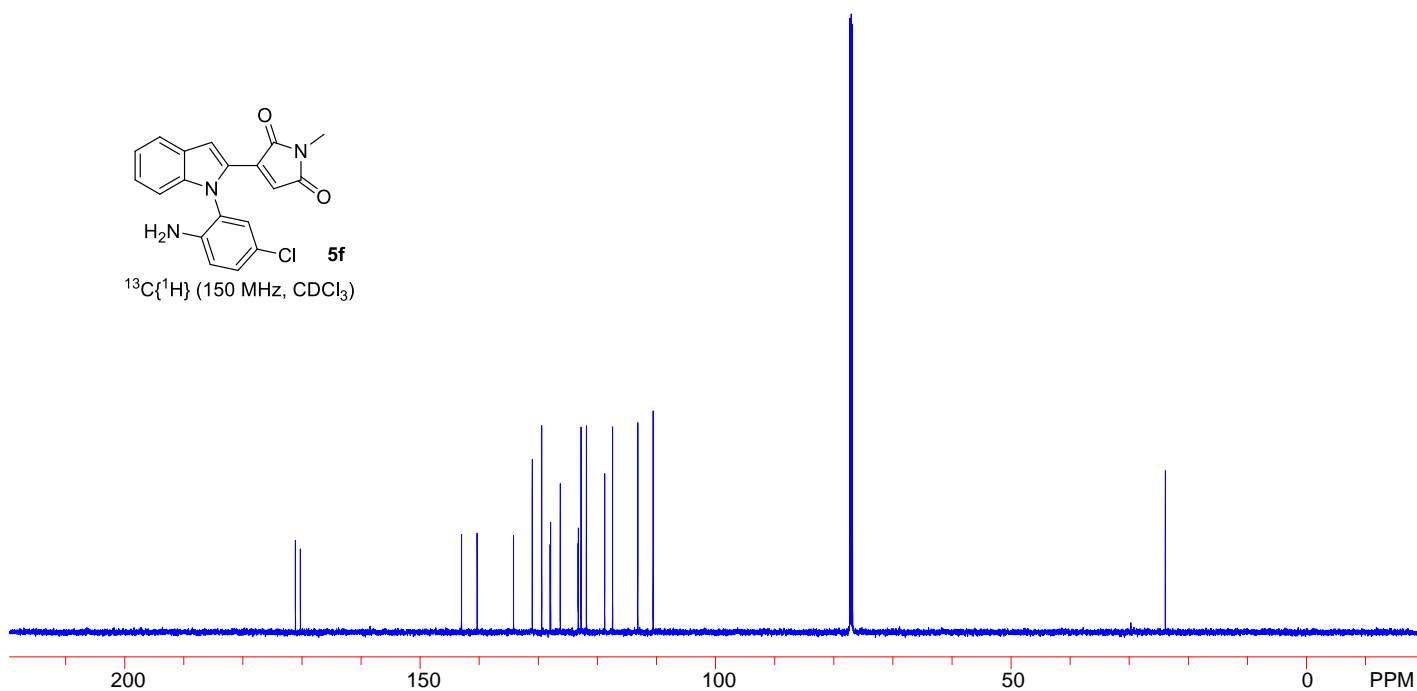

## VIII. X-ray crystal structure and data of 3a

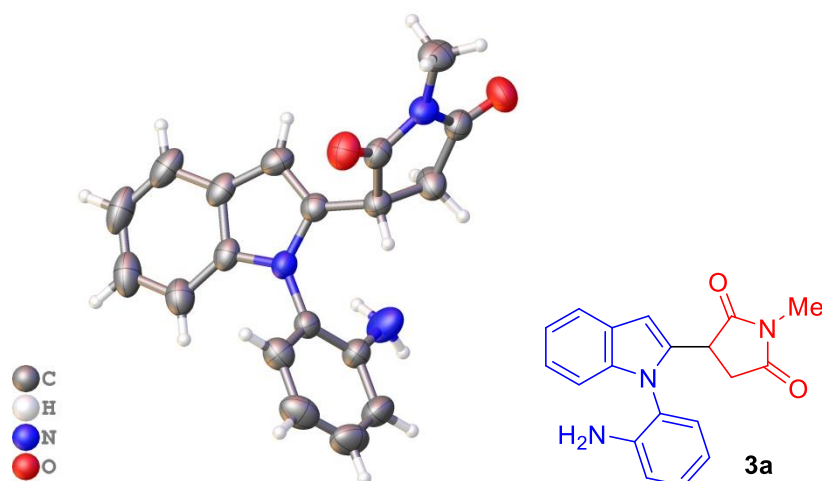

Fig. S1 X-ray crystal structure of **3a** with 50% ellipsoid probability

**X-ray structure determination.** Single crystals suitable for X-ray diffraction were obtained by slow evaporation of the solvent from a petroleum ether/ethyl acetate (4:1) solution of **3a**. Crystal data collection and refinement parameters of **3a** are summarized in Table S1. Intensity data were collected at 293 K on a SuperNova Dual diffractometer using mirror-monochromated Cu K $\alpha$  radiation,  $\lambda = 1.54184 \text{ \AA}$ . The data were corrected for decay, Lorentz, and polarization effects as well as absorption and beam corrections based on the multi-scan technique. Using Olex2, the structure was solved with the SHELXS structure solution program using Direct Methods and refined with the SHELXL refinement package using Least Squares minimisation. Nonhydrogen atoms were refined with anisotropic displacement parameters. The H-atoms were either located or calculated and subsequently treated with a riding model.

**Table S1** Crystallographic data and structure refinement results of **3a**

|                   |                                                               |
|-------------------|---------------------------------------------------------------|
| Empirical formula | C <sub>19</sub> H <sub>17</sub> N <sub>3</sub> O <sub>2</sub> |
| Formula weight    | 319.35                                                        |
| Temp, K           | 293(2)                                                        |
| Crystal system    | monoclinic                                                    |
| Space group       | P2 <sub>1</sub> /n                                            |
| <i>a</i> , Å      | 11.5596(3)                                                    |
| <i>b</i> , Å      | 10.6483(2)                                                    |
| <i>c</i> , Å      | 14.4503(3)                                                    |

|                                        |                |
|----------------------------------------|----------------|
| $\alpha$ (°)                           | 90             |
| $\beta$ (°)                            | 112.178(3)     |
| $\gamma$ (°)                           | 90             |
| Volume, Å <sup>3</sup>                 | 1647.09(7)     |
| Z                                      | 4              |
| $d_{\text{calc}}$ , g cm <sup>-3</sup> | 1.288          |
| $\lambda$ , Å                          | 1.54184        |
| $\mu$ , mm <sup>-1</sup>               | 0.691          |
| No. of data collected                  | 7714           |
| No. of unique data                     | 3141           |
| $R_{\text{int}}$                       | 0.0223         |
| Goodness-of-fit on $F^2$               | 1.147          |
| $R_1$ , $wR_2$ ( $I > 2\sigma(I)$ )    | 0.0551, 0.1639 |
| $R_1$ , $wR_2$ (all data)              | 0.0647, 0.1691 |



## IX. X-ray crystal structure and data of 4a

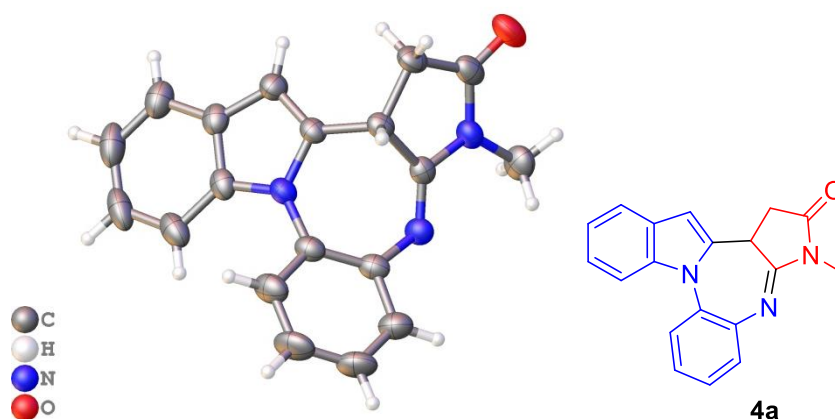

Fig. S2 X-ray crystal structure of **4a** with 50% ellipsoid probability

**X-ray structure determination.** Single crystals suitable for X-ray diffraction were obtained by slow evaporation of the solvent from a petroleum ether/ethyl acetate (4:1) solution of **4a**. Crystal data collection and refinement parameters of **4a** are summarized in Table S2. Intensity data were collected at 293 K on a SuperNova Dual diffractometer using mirror-monochromated Cu K $\alpha$  radiation,  $\lambda = 1.54184 \text{ \AA}$ . The data were corrected for decay, Lorentz, and polarization effects as well as absorption and beam corrections based on the multi-scan technique. Using Olex2, the structure was solved with the SHELXS structure solution program using Direct Methods and refined with the SHELXL refinement package using Least Squares minimisation. Nonhydrogen atoms were refined with anisotropic displacement parameters. The H-atoms were either located or calculated and subsequently treated with a riding model.

**Table S2** Crystallographic data and structure refinement results of **4a**

|                   |                                                  |
|-------------------|--------------------------------------------------|
| Empirical formula | C <sub>19</sub> H <sub>15</sub> N <sub>3</sub> O |
| Formula weight    | 301.34                                           |
| Temp, K           | 293(2)                                           |
| Crystal system    | monoclinic                                       |
| Space group       | P2 <sub>1</sub> /n                               |
| <i>a</i> , Å      | 8.6573(2)                                        |
| <i>b</i> , Å      | 8.6388(2)                                        |
| <i>c</i> , Å      | 19.5245(4)                                       |
| $\alpha$ (°)      | 90                                               |

|                                        |                |
|----------------------------------------|----------------|
| $\beta$ (°)                            | 96.868(2)      |
| $\gamma$ (°)                           | 90             |
| Volume, Å <sup>3</sup>                 | 1449.73(6)     |
| Z                                      | 4              |
| $d_{\text{calc}}$ , g cm <sup>-3</sup> | 1.381          |
| $\lambda$ , Å                          | 1.54184        |
| $\mu$ , mm <sup>-1</sup>               | 0.701          |
| No. of data collected                  | 6282           |
| No. of unique data                     | 2751           |
| $R_{\text{int}}$                       | 0.0200         |
| Goodness-of-fit on $F^2$               | 1.257          |
| $R_1$ , $wR_2$ ( $I > 2\sigma(I)$ )    | 0.0529, 0.1427 |
| $R_1$ , $wR_2$ (all data)              | 0.0668, 0.1474 |

## X. References

1. T. U. Thikekar and C.-M. Sun, Palladium-Catalyzed Regioselective Synthesis of 1,2-Fused-Indole Diazepines via [5+2] Annulation of *o*-Indoloanilines with Alkynes, *Adv. Synth. Catal.*, **2017**, 359, 3388-3396.
2. A. Mandal, H. Sahoo, S. Dana and M. Baidya, Ruthenium(II)-Catalyzed Hydroarylation of Maleimides Using Carboxylic Acids as a Traceless Directing Group, *Org. Lett.*, **2017**, 19, 4138-4141.
